# Supplementary material for: PI3Kδ Inhibition Potentiates Glucocorticoids in B-lymphoblastic Leukemia by Decreasing Receptor Phosphorylation and Enhancing Gene Regulation
Source: MDPI journal article supplement (doi:10.3390/cancers16010143), 2023-12-27
Supplement: s1 [file s1]

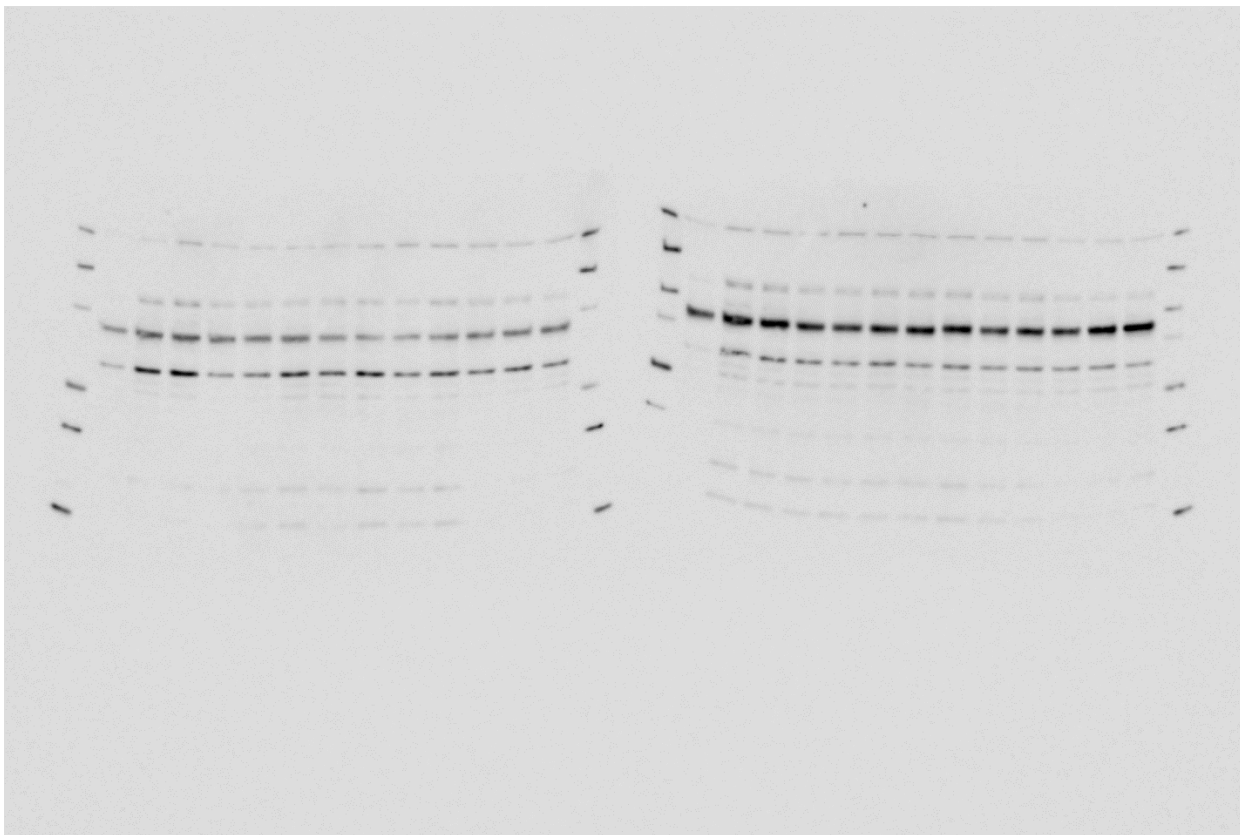

**Figure S10A. Original western blots for Figure 4D-E showing total GR for S226P probing.** Lanes from left to right, with GR at ~95 kD.

Left side blot: BioRad Precision Plus Protein WesternC Blotting Standard (#1610376); No treatment (0 hrs); Vehicle treated x2 hrs; Vehicle treated x4 hrs; Vehicle treated x6 hrs; Vehicle treated x8 hrs; Vehicle treated x16 hrs; Vehicle treated x24 hrs; 1 uM dexamethasone treated x2 hrs; 1 uM dexamethasone treated x4 hrs; 1 uM dexamethasone treated x6 hrs; 1 uM dexamethasone treated x8 hrs; 1 uM dexamethasone treated x16 hrs; 1 uM dexamethasone treated x24 hrs; BioRad Precision Plus Protein WesternC Blotting Standard (#1610376)

Right side blot: BioRad Precision Plus Protein WesternC Blotting Standard (#1610376); No treatment (0 hrs); 250 nM idelalisib treated x2 hrs; 250 nM idelalisib treated x4 hrs; 250 nM idelalisib treated x6 hrs; 250 nM idelalisib treated x8 hrs; 250 nM idelalisib treated x16 hrs; 250 nM idelalisib treated x24 hrs; 1 uM dexamethasone + 250 nM idelalisib treated x2 hrs; 1 uM dexamethasone + 250 nM idelalisib treated x4 hrs; 1 uM dexamethasone + 250 nM idelalisib treated x6 hrs; 1 uM dexamethasone + 250 nM idelalisib treated x8 hrs; 1 uM dexamethasone + 250 nM idelalisib treated x16 hrs; 1 uM dexamethasone + 250 nM idelalisib treated x24 hrs; BioRad Precision Plus Protein WesternC Blotting Standard (#1610376)

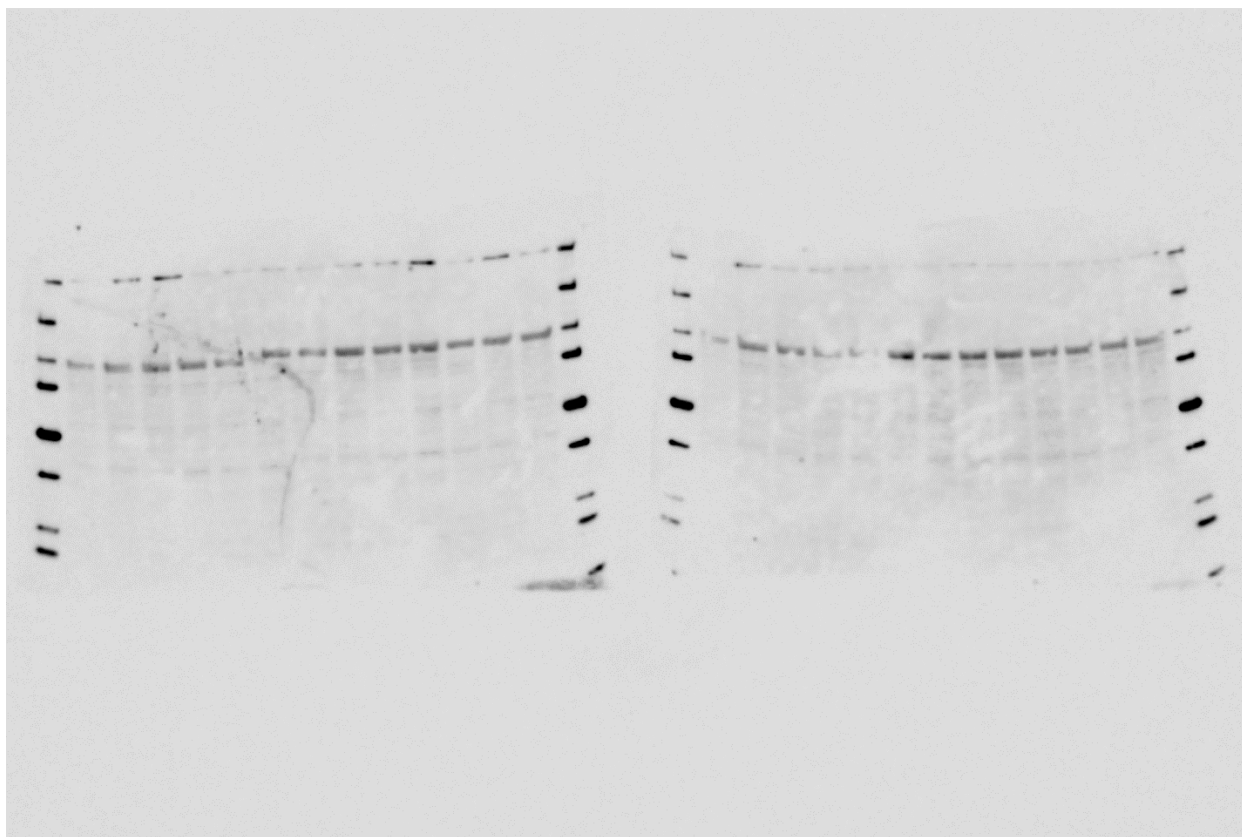

**Figure S10B. Original western blots for Figure 4D-E showing GR-S226P.** Lanes from left to right, with GR at ~95 kD.

Left side blot: BioRad Precision Plus Protein WesternC Blotting Standard (#1610376); No treatment (0 hrs); Vehicle treated x2 hrs; Vehicle treated x4 hrs; Vehicle treated x6 hrs; Vehicle treated x8 hrs; Vehicle treated x16 hrs; Vehicle treated x24 hrs; 1 uM dexamethasone treated x2 hrs; 1 uM dexamethasone treated x4 hrs; 1 uM dexamethasone treated x6 hrs; 1 uM dexamethasone treated x8 hrs; 1 uM dexamethasone treated x16 hrs; 1 uM dexamethasone treated x24 hrs; BioRad Precision Plus Protein WesternC Blotting Standard (#1610376)

Right side blot: BioRad Precision Plus Protein WesternC Blotting Standard (#1610376); No treatment (0 hrs); 250 nM idelalisib treated x2 hrs; 250 nM idelalisib treated x4 hrs; 250 nM idelalisib treated x6 hrs; 250 nM idelalisib treated x8 hrs; 250 nM idelalisib treated x16 hrs; 250 nM idelalisib treated x24 hrs; 1 uM dexamethasone + 250 nM idelalisib treated x2 hrs; 1 uM dexamethasone + 250 nM idelalisib treated x4 hrs; 1 uM dexamethasone + 250 nM idelalisib treated x6 hrs; 1 uM dexamethasone + 250 nM idelalisib treated x8 hrs; 1 uM dexamethasone + 250 nM idelalisib treated x16 hrs; 1 uM dexamethasone + 250 nM idelalisib treated x24 hrs; BioRad Precision Plus Protein WesternC Blotting Standard (#1610376)

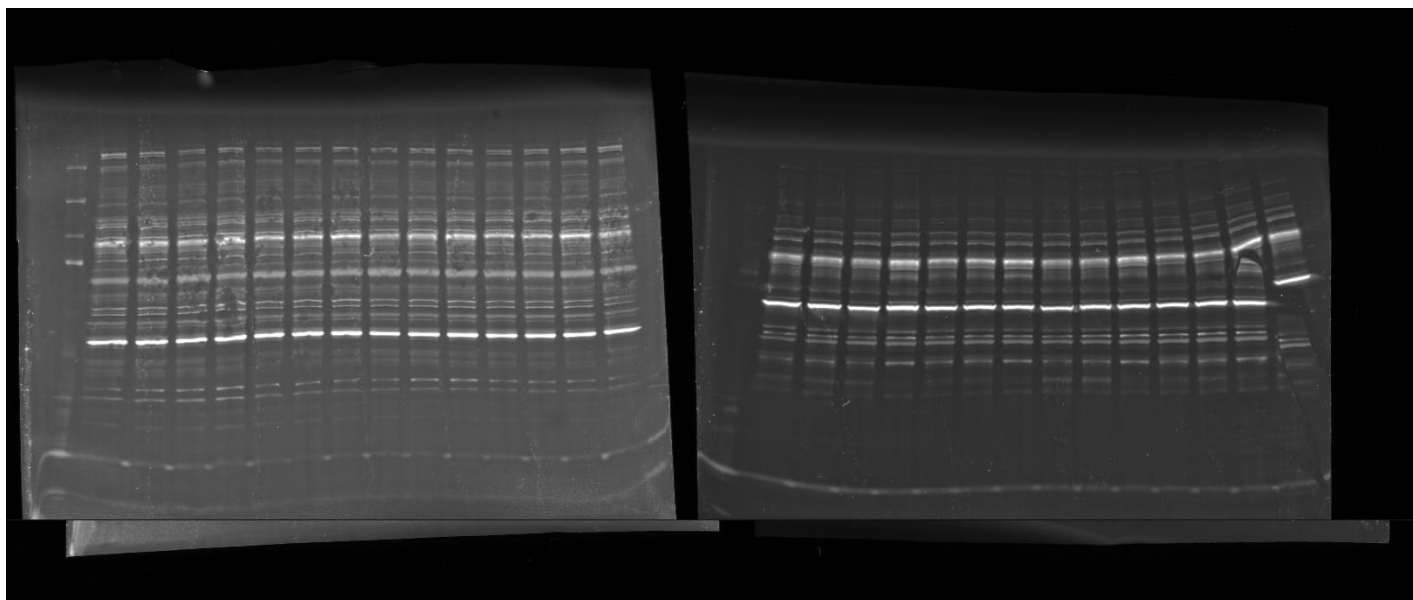

**Figure S11A. Original western blots for Figure 4D-E showing total GR for GR-S226P (left) and GR-S203P (right) probing.** Lanes from left to right on both blots, with GR at ~95 kD: Kaleidoscope Precision Plus Protein Standard (Bio-Rad #1610375); No treatment (0 hrs); Vehicle treatment x6 hrs; Vehicle treatment x8 hrs; Vehicle treatment x24 hrs; 5 nM dexamethasone treatment x6 hrs; 5 nM dexamethasone treatment x8 hrs; 5 nM dexamethasone treatment x24 hrs; 250 nM idelalisib treatment x6 hrs; 250 nM idelalisib treatment x8 hrs; 250 nM idelalisib treatment x24 hrs; 5 nM dexamethasone + 250 nM idelalisib treatment x6 hrs; 5 nM dexamethasone + 250 nM idelalisib treatment x8 hrs; 5 nM dexamethasone + 250 nM idelalisib treatment x24 hrs; No treatment (0 hrs). Left blot was later probed for GR-S226P and right blot was later probed for GR-S203P.

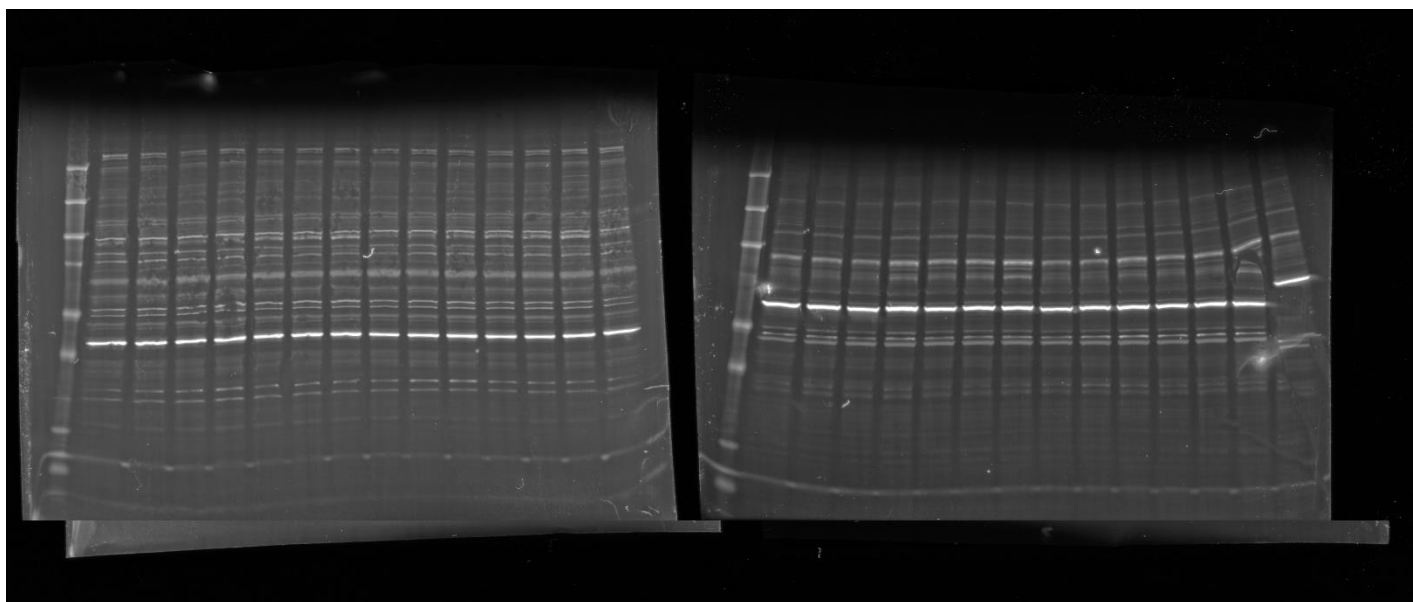

**Figure S11B. Original western blots for Figure 4D-E showing GR-S226P (left) and GR-S203P (right).** Lanes from left to right on both blots, with GR at ~95 kD: Kaleidoscope Precision Plus Protein Standard (Bio-Rad #1610375); No treatment (0 hrs); Vehicle treatment x6 hrs; Vehicle treatment x8 hrs; Vehicle treatment x24 hrs; 5 nM dexamethasone treatment x6 hrs; 5 nM dexamethasone treatment x8 hrs; 5 nM dexamethasone treatment x24 hrs; 250 nM idelalisib treatment x6 hrs; 250 nM idelalisib treatment x8 hrs; 250 nM idelalisib treatment x24 hrs; 5 nM dexamethasone + 250 nM idelalisib treatment x6 hrs; 5 nM dexamethasone + 250 nM idelalisib treatment x8 hrs; 5 nM dexamethasone + 250 nM idelalisib treatment x24 hrs; No treatment (0 hrs). Left blot was probed for GR-S226P and right blot was probed for GR-S203P.
