# Supplementary material for: PI3Kδ Inhibition Potentiates Glucocorticoids in B-lymphoblastic Leukemia by Decreasing Receptor Phosphorylation and Enhancing Gene Regulation
Source: MDPI journal article supplement (doi:10.3390/cancers16010143), 2023-12-27
Supplement: s1 [file s1]

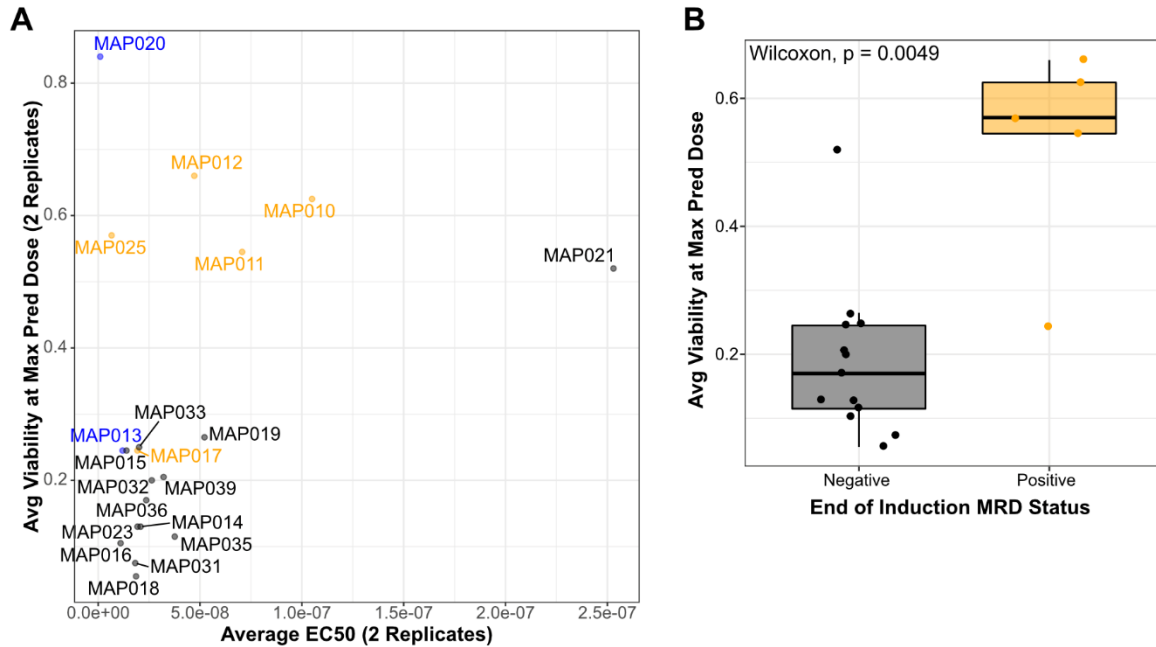

**Figure S1. *In vitro* specimen viability after prednisolone treatment correlates with patient response.**

(A) Response of primary specimens by EC50 of prednisolone (x-axis) and cell viability fraction at a maximum tested dose of prednisolone (10  $\mu$ M) (y-axis). Specimens with positive end-of-induction minimal residual disease (MRD) are shown in orange, and specimens with unknown end-of-induction MRD are in blue. The remaining specimens in black were MRD negative. (B) Boxplots comparing the average viability of primary patient specimens treated with the maximum dose of prednisolone (10  $\mu$ M) *in vitro* for specimens obtained from patients who had negative end of induction minimal residual disease (MRD) status (left, black) or positive end of induction MRD status (right, orange).

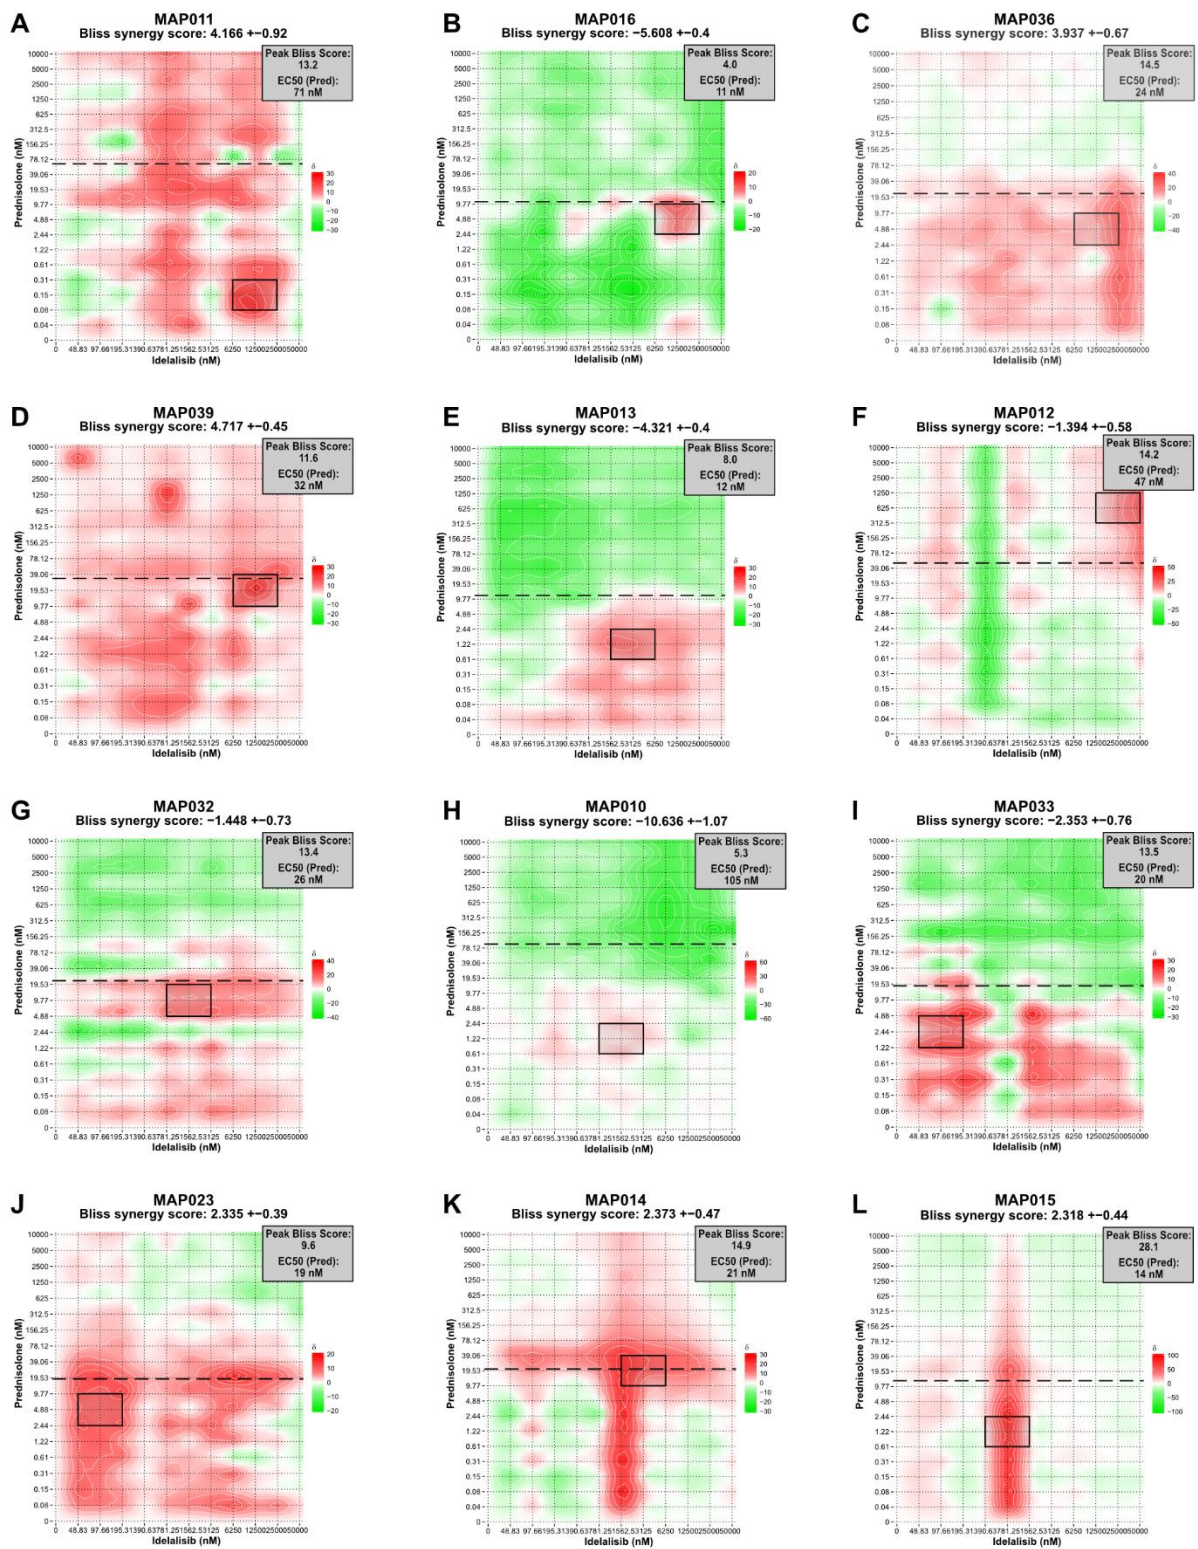



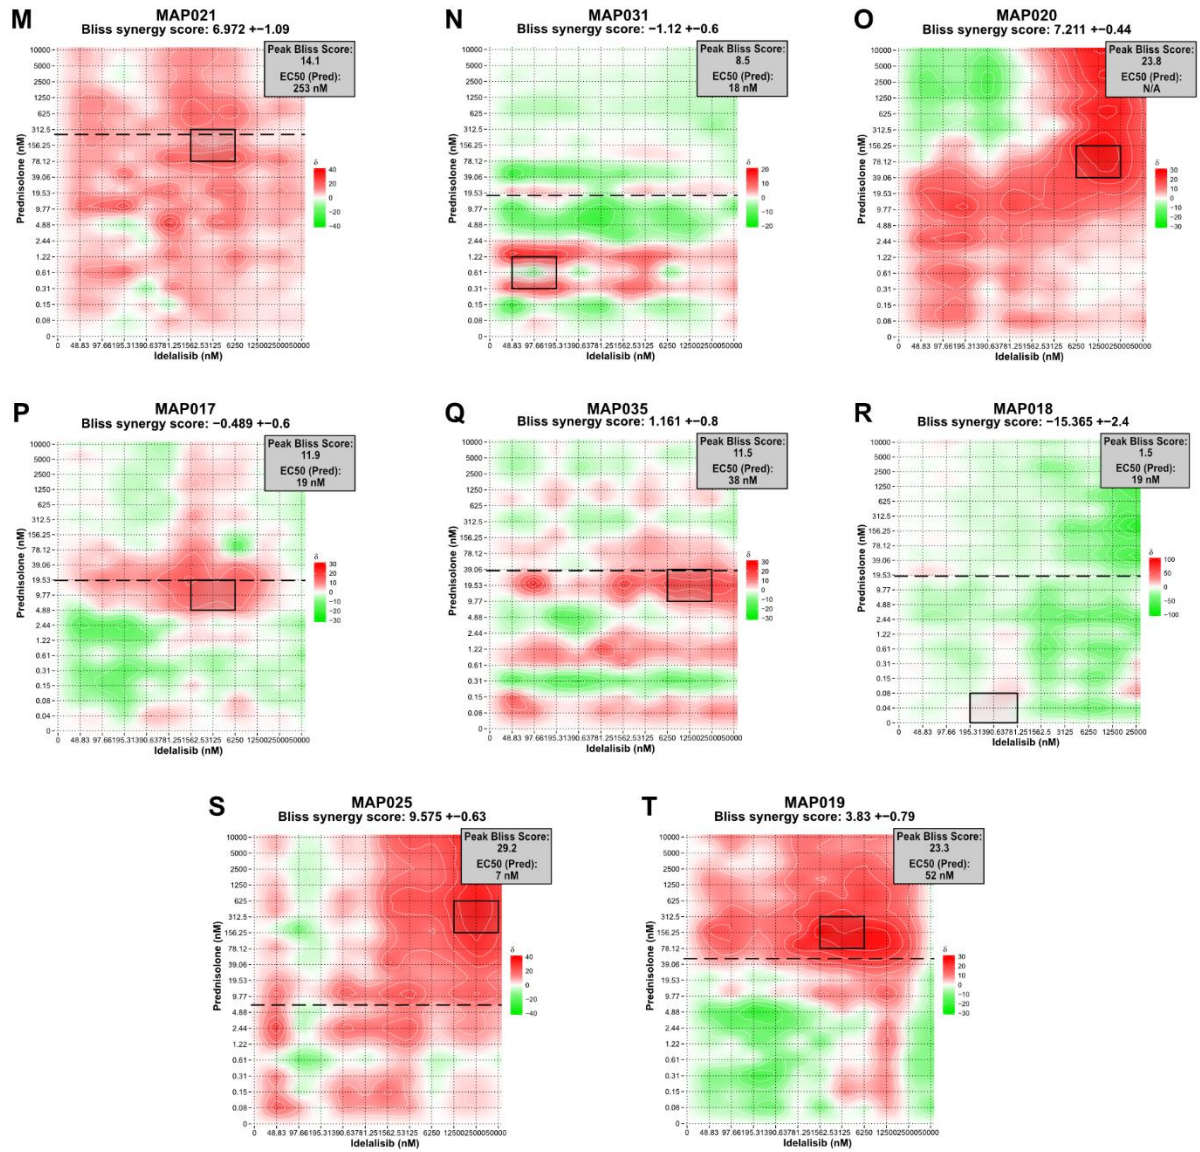

**Figure S2. Bliss synergy plots for primary specimens treated with prednisolone and idelalisib. (A-D)** NCI standard risk specimens with favorable cytogenetic features. **(E-G)** NCI standard risk specimens with neutral cytogenetic features. **(H-I)** NCI standard risk specimens with unfavorable cytogenetic features. **(J)** NCI high risk specimen with favorable cytogenetic features. **(K-N)** NCI high risk specimens with neutral cytogenetic features. **(O)** NCI high risk specimen with CRLF2 rearrangement. **(P-Q)** NCI high risk specimen with unfavorable cytogenetic features. **(R-S)** Specimens from infants with B-ALL. **(T)** Specimen from first late marrow relapse of B-ALL. The area of peak Bliss score is outlined in black on each plot with the value given in the box at the top right of each plot. EC50 for prednisolone is the average of 2 replicates per specimen and is given in the box at the top right of each plot. The approximate location of the EC50 is indicated on each plot by the long dashed black line.

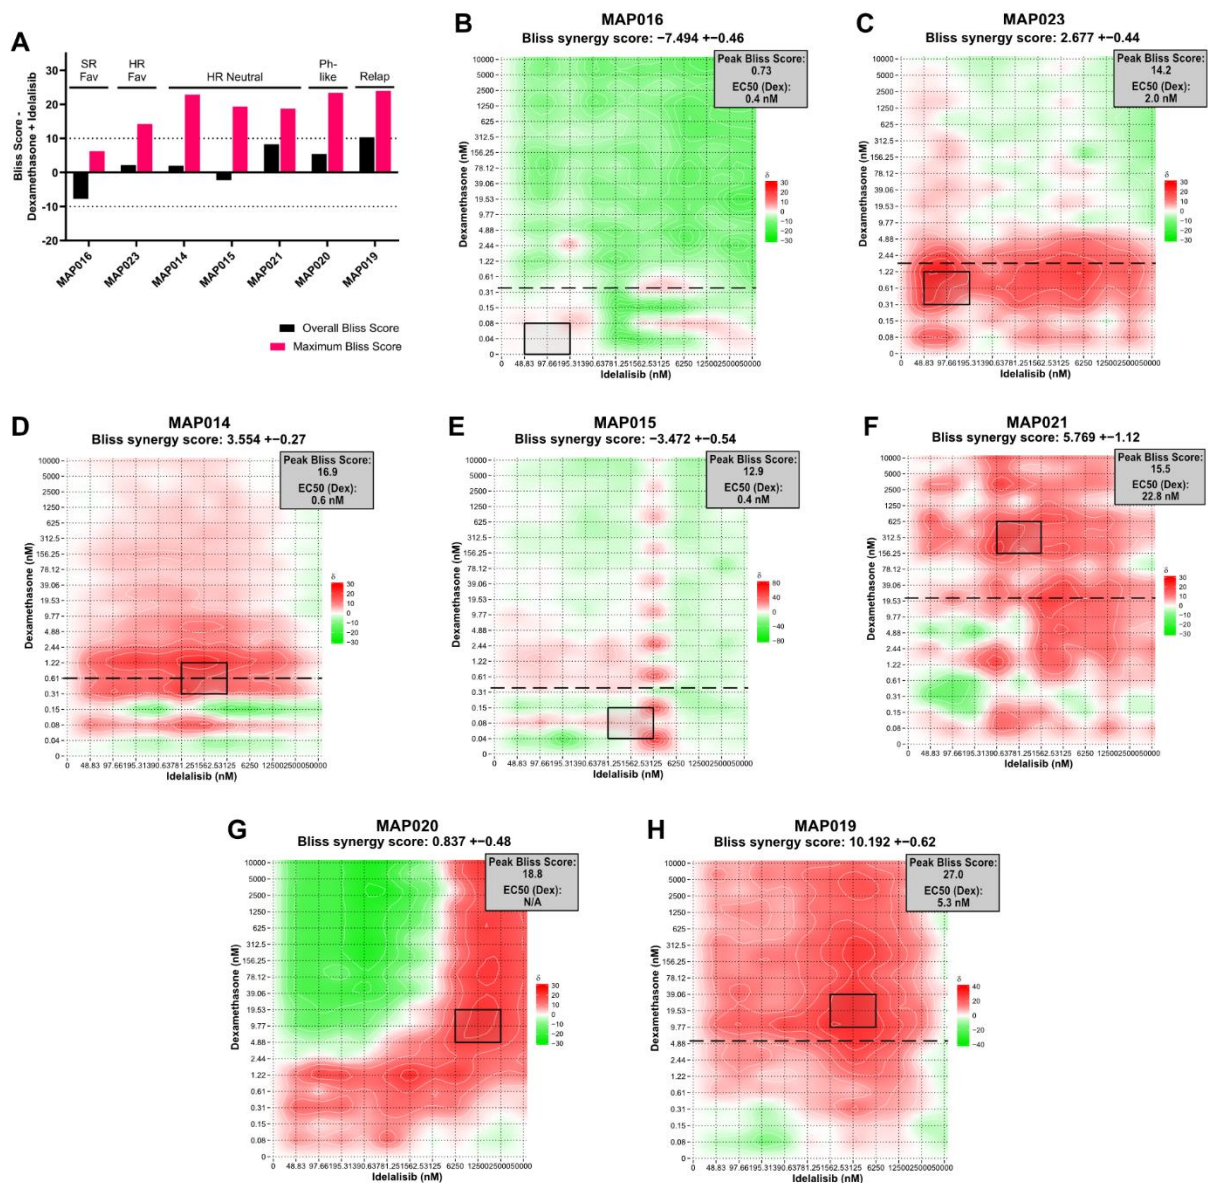

**Figure S3. Combination dexamethasone and idelalisib treatment in primary specimens produces synergy similar to prednisolone and idelalisib.** (A) Summary of overall (black) and maximum/peak (pink) Bliss scores for seven primary specimens. SR = NCI Standard Risk. HR = NCI High Risk. Fav = favorable cytogenetics. Relap = relapsed B-ALL. (B-H) Bliss synergy plots for primary specimens treated with dexamethasone and idelalisib with (B) NCI standard risk B-ALL and favorable cytogenetic features, (C) NCI high risk B-ALL with favorable cytogenetic features, (D-F) NCI high risk B-ALL with neutral cytogenetic features, (G) NCI high risk B-ALL with CRLF2 rearrangement, or (H) first late marrow relapse of B-ALL. The area of peak Bliss score is outlined in black on each plot with the value given in the box at the top right of each plot. EC50 for dexamethasone is the average of 2 replicates per specimen and is given in the box at the top right of each plot. The approximate location of the EC50 is indicated on each plot by the long dashed black line.

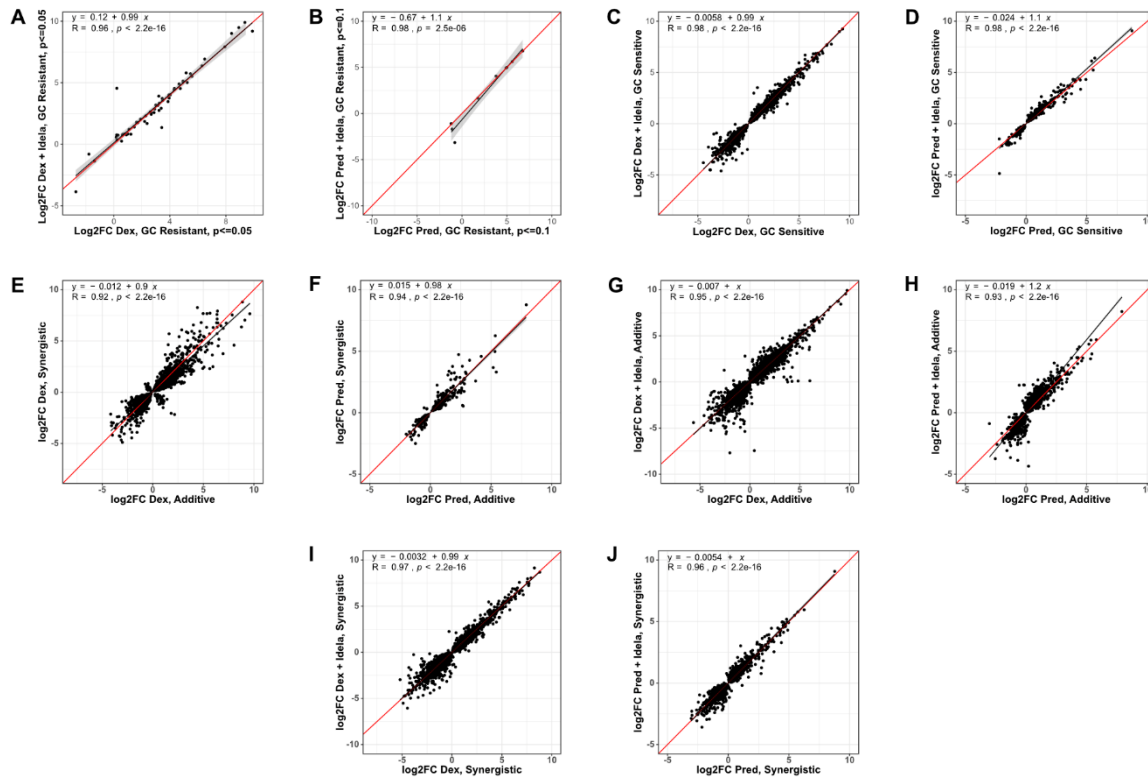

**Figure S4. Gene expression in glucocorticoid-resistant and glucocorticoid-sensitive primary patient specimens treated with glucocorticoids with and without idelalisib.** (A-B) Comparison of gene expression log2 fold change in 2 glucocorticoid-resistant specimens with (A) dex only (x-axis) versus dex+idela (y-axis) and (B) pred only (x-axis) versus pred+idela (y-axis). (C-D) Comparison of gene expression log2 fold change in 5 glucocorticoid-sensitive specimens treated with (C) dex only (x-axis) versus dex+idela (y-axis) and (D) pred only (x-axis) versus pred+idela (y-axis). (E-F) Comparison of gene expression with (E) dex only or (F) pred only in primary patient specimens with additive (x-axis) vs. synergistic (y-axis) responses to pred+idela treatment in viability assays. (G-H) Comparison of gene expression with (G) dex only (x-axis) versus dex+idela (y-axis) and (H) pred only (x-axis) versus pred+idela (y-axis) in primary patient specimens with an additive response to pred+idela treatment in viability assays. (I-J) Comparison of gene expression with (I) dex only (x-axis) versus dex+idela (y-axis) and (J) pred only (x-axis) versus pred+idela (y-axis) in primary patient specimens with a synergistic response to pred+idela treatment in viability assays. For all scatter plots, the Pearson correlation and regression equations are reported, and red line indicates no difference between the two conditions.



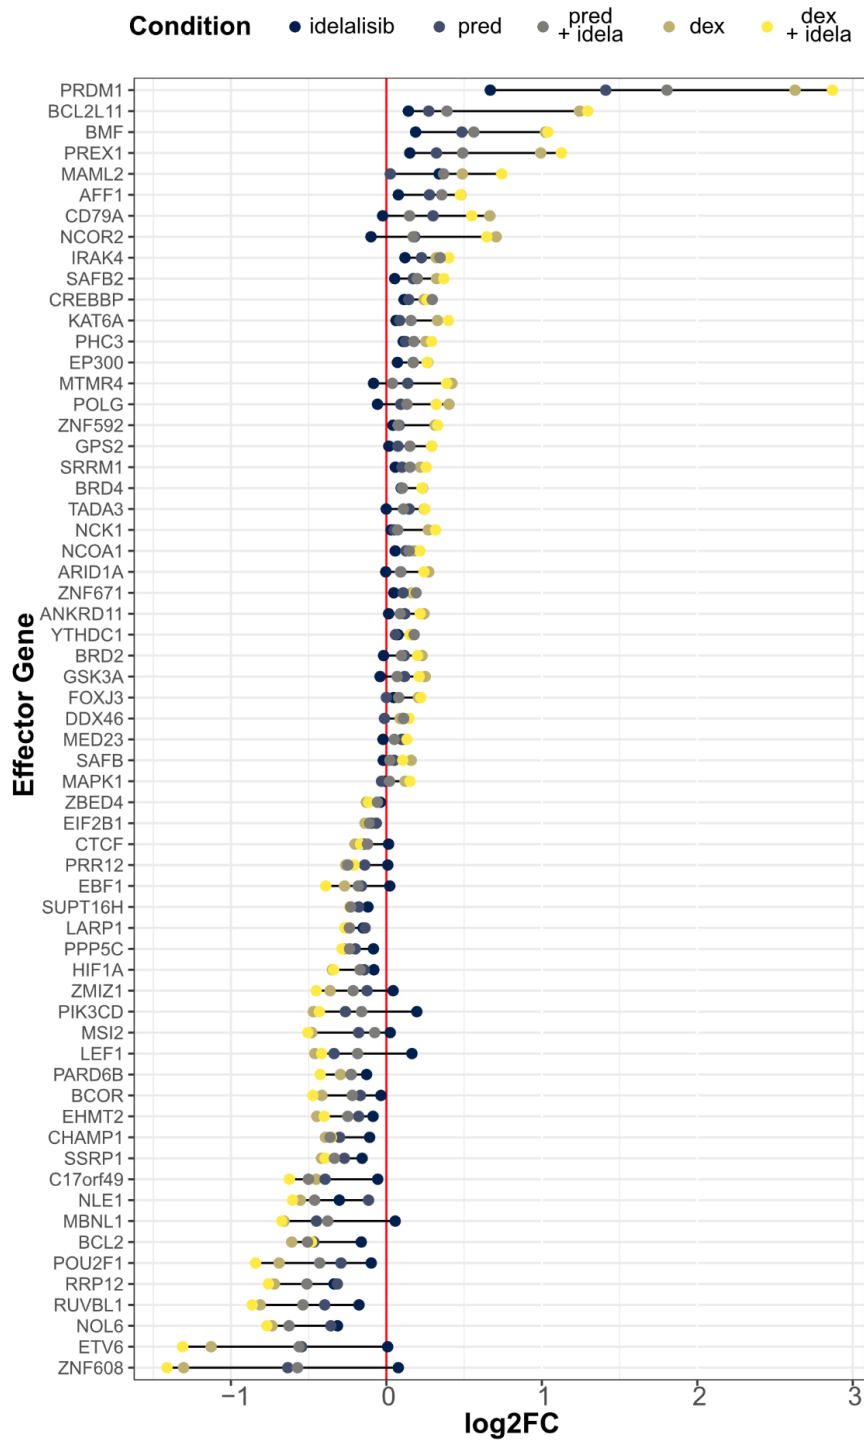

**Figure S5A. Glucocorticoid-sensitive primary specimens exhibit enhanced effector gene expression in response to idelalisib.** The log2 fold change of effector genes in response to idelalisib (idela, 250 nM), prednisolone (pred, 50 nM), idela + prednisolone (250 nM, 50 nM), dexamethasone (dex, 50 nM) and dexamethasone + idelalisib (50 nM, 250 nM) treatment.

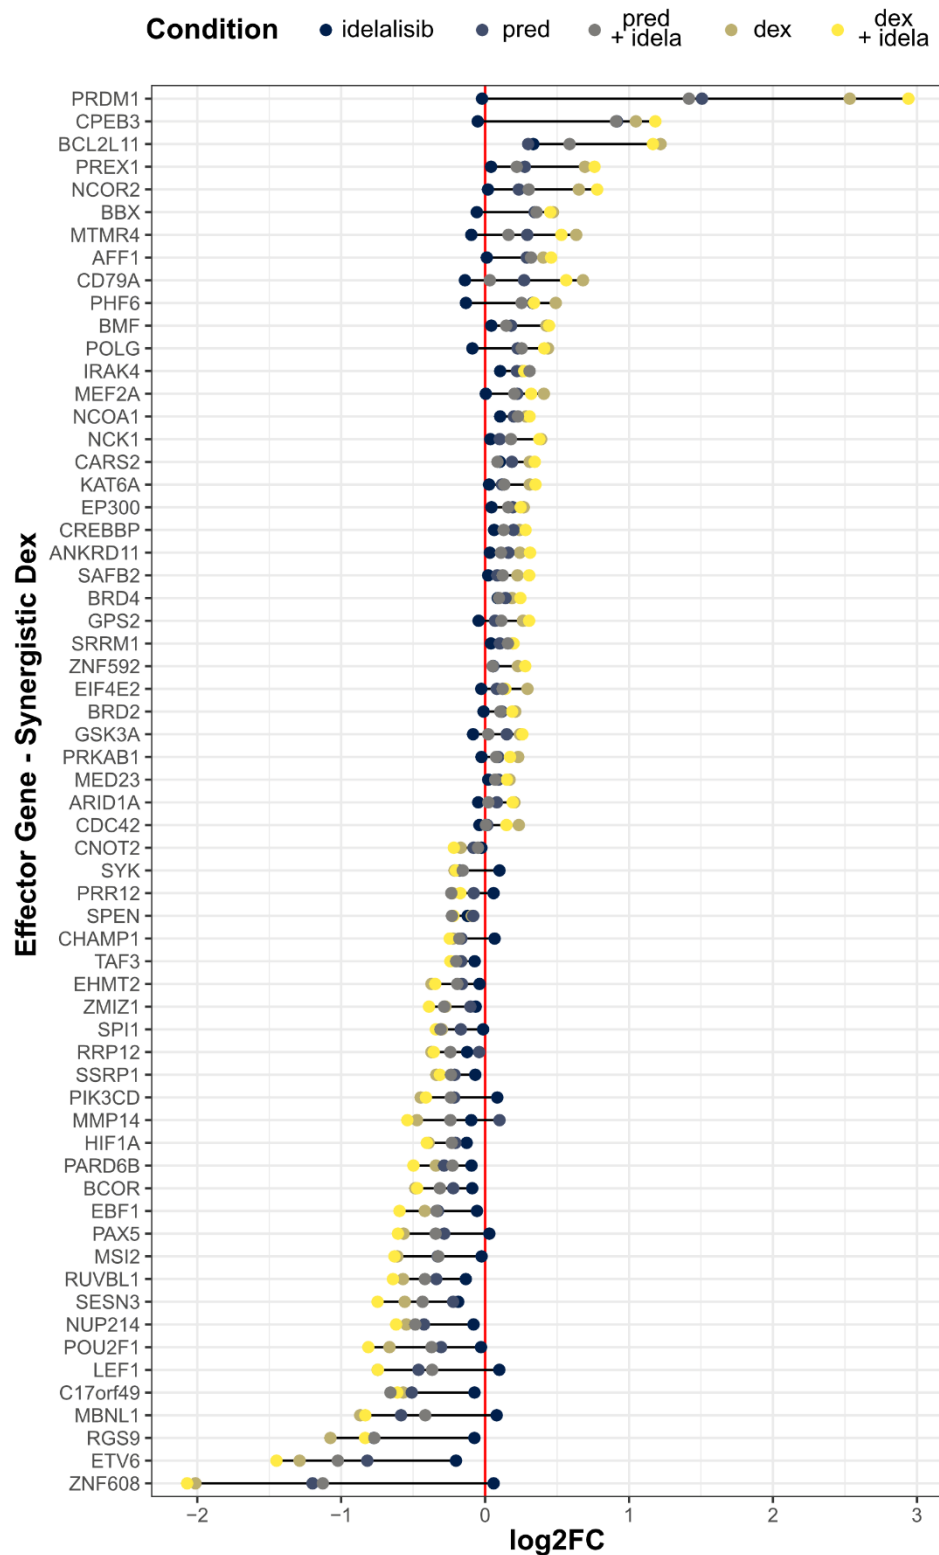

**Figure S5B. Primary specimens with synergistic responses to combination glucocorticoids and idelalisib exhibit inconsistently enhanced effector gene expression in response to dexamethasone with idelalisib.** The log2 fold change of effector genes in response to idelalisib (idela, 250 nM),

prednisolone (pred, 50 nM), idela + prednisolone (250 nM, 50 nM), dexamethasone (dex, 50 nM) and dexamethasone + idelalisib (50 nM, 250 nM) treatment.

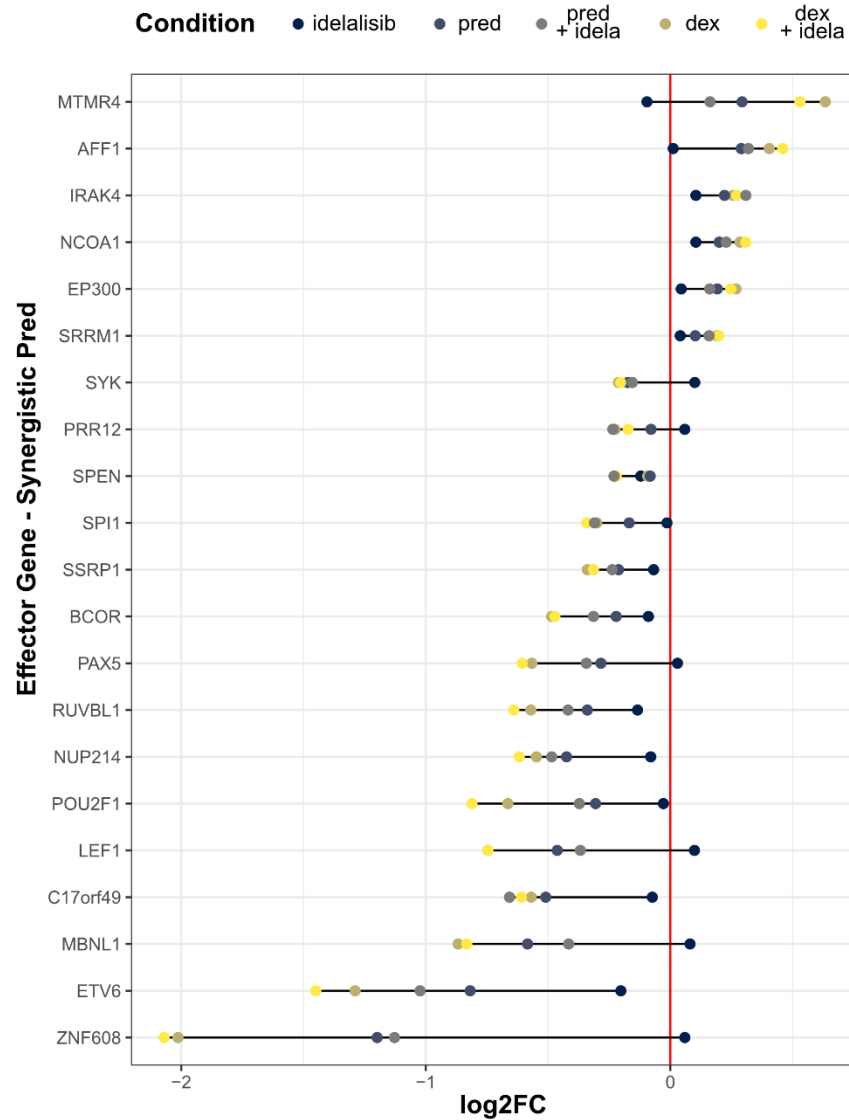

**Figure S5C. Primary specimens with synergistic responses to combination glucocorticoids and idelalisib exhibit inconsistently enhanced effector gene expression in response to prednisolone with idelalisib.** The log2 fold change of effector genes in response to idelalisib (idela, 250 nM), prednisolone (pred, 50 nM), idela + prednisolone (250 nM, 50 nM), dexamethasone (dex, 50 nM) and dexamethasone + idelalisib (50 nM, 250 nM) treatment.



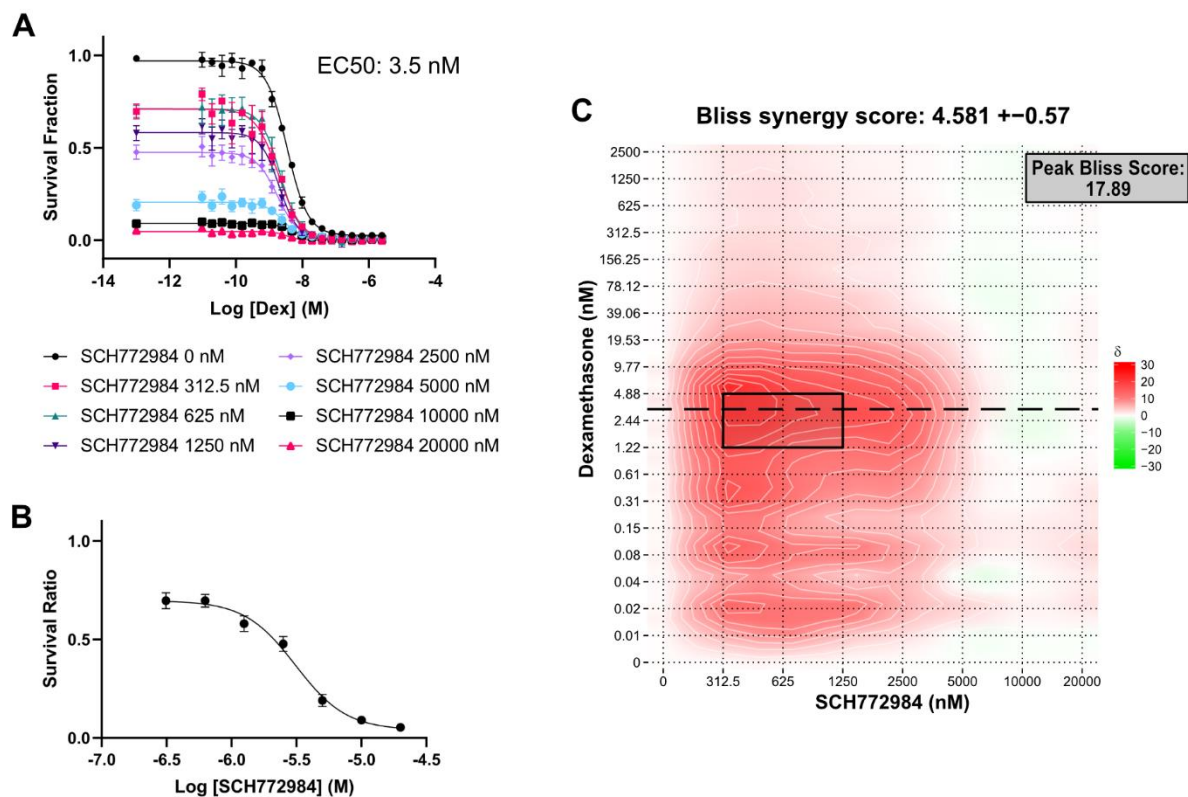

**Figure S6. Synergy evaluation of NALM6 cells treated with dexamethasone and the ERK1/2 inhibitor SCH772984.** (A) Dose-response curves for dexamethasone (Dex) at different doses of SCH772984, with 3 replicates per concentration. Dexamethasone alone (SCH772984 0 nM) is shown in the top black line. (B) Dose-response curve for SCH772984 alone, 3 replicates per concentration. (C) Synergy plot of the combination treatment. Bliss score greater than 10 indicates synergy, 10 to -10 indicates additivity, and less than -10 indicates antagonism. Peak Bliss score from the black outlined area is given in the box below the plot. Long dashed black line indicates the approximate EC50 for dexamethasone.

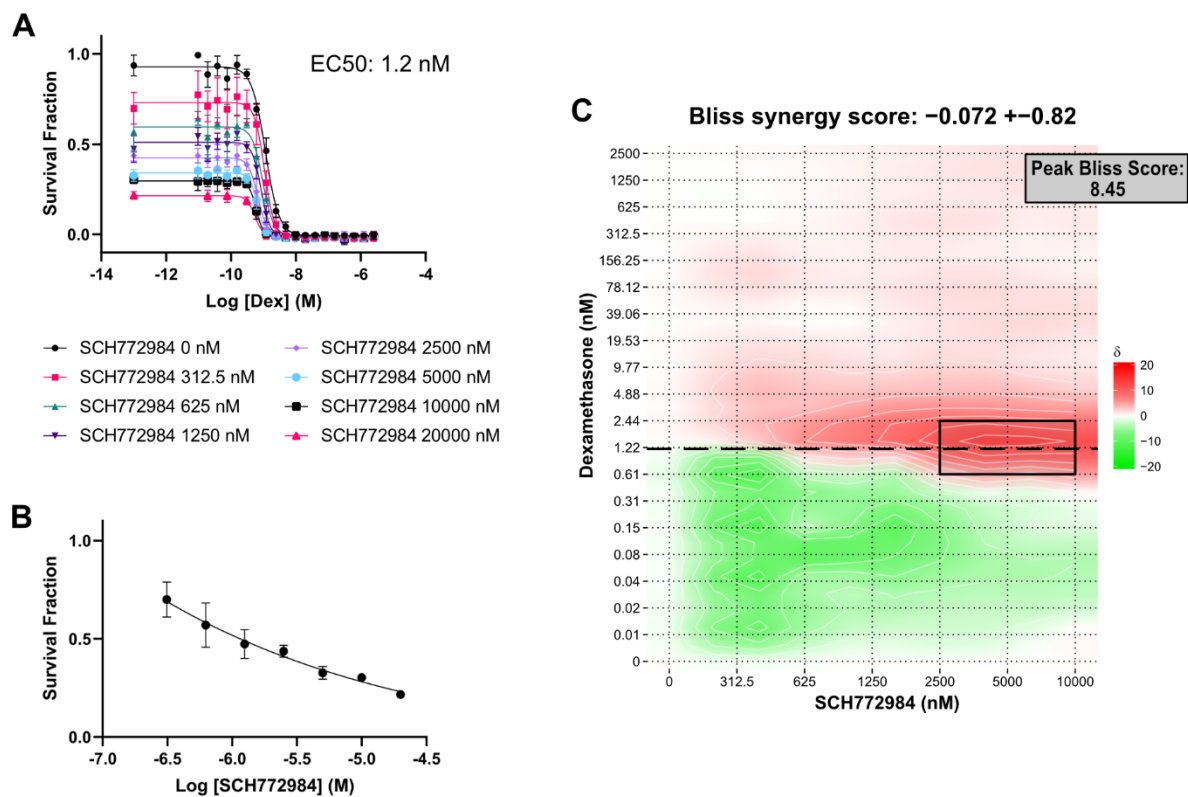

**Figure S7. Synergy evaluation of Sup-B15 cells treated with dexamethasone and the ERK1/2 inhibitor SCH772984.** (A) Dose-response curves for dexamethasone (Dex) at different doses of SCH772984, with 3 replicates per concentration. Dexamethasone alone (SCH772984 0 nM) is shown in the top black line. (B) Dose-response curve for SCH772984 alone, 3 replicates per concentration. (C) Synergy plot of the combination treatment. Bliss score greater than 10 indicates synergy, 10 to -10 indicates additivity, and less than -10 indicates antagonism. Peak Bliss score from the black outlined area is given in the box below the plot. Long dashed black line indicates the approximate EC50 for dexamethasone.

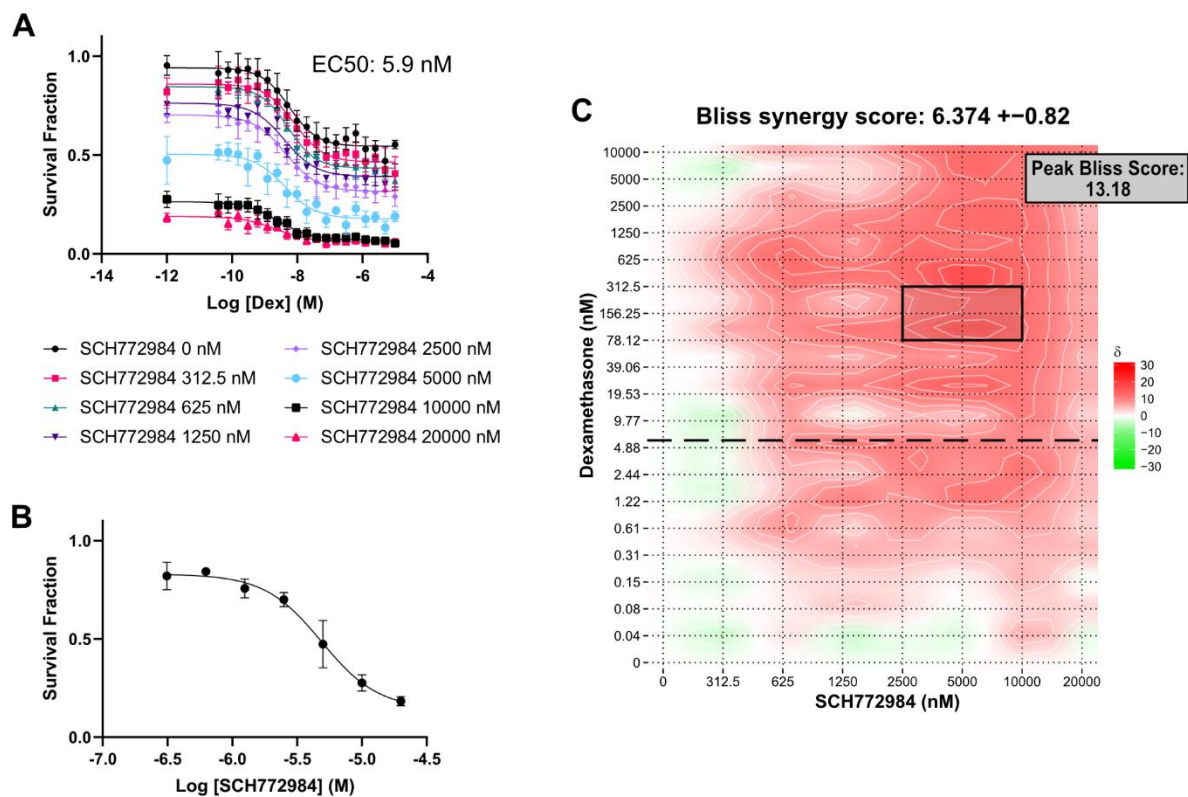

**Figure S8. Synergy evaluation of RCH-ACV cells treated with dexamethasone and the ERK1/2 inhibitor SCH772984.** (A) Dose-response curves for dexamethasone (Dex) at different doses of SCH772984, with 3 replicates per concentration. Dexamethasone alone (SCH772984 0 nM) is shown in the top black line. (B) Dose-response curve for SCH772984 alone, 3 replicates per concentration. (C) Synergy plot of the combination treatment. Bliss score greater than 10 indicates synergy, 10 to -10 indicates additivity, and less than -10 indicates antagonism. Peak Bliss score from the black outlined area is given in the box below the plot. Long dashed black line indicates the approximate EC50 for dexamethasone, which is below the peak Bliss score area in these non-glucocorticoid sensitive cells.

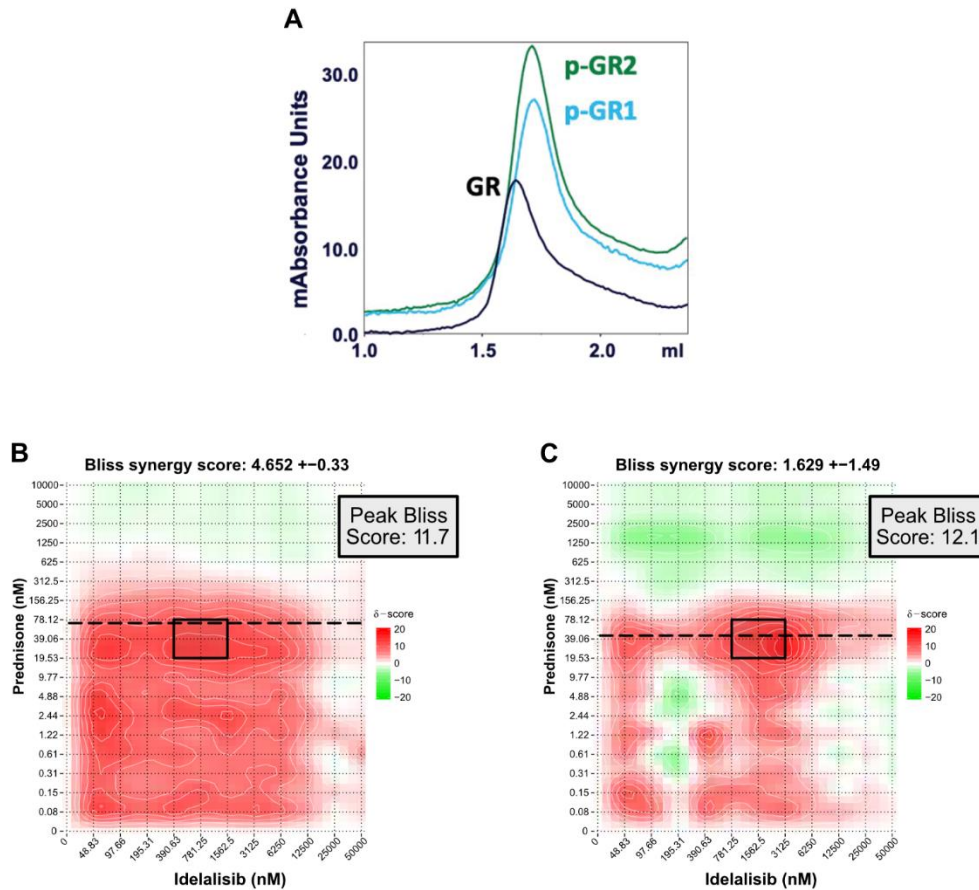

**Figure S9. Phosphorylation of GR at S226 has a negative effect on glucocorticoid sensitivity.** (A) Size exclusion chromatography indicated that unmodified GR (black) eluted at a lower volume than two independent samples of GR-AF1-DBD-1P (blue, green). (B-C) Representative Bliss synergy plots for (B) NALM6 GR S203A cells tested with prednisolone and idelalisib and (C) NALM6 GR S226A cells tested with prednisolone and idelalisib. The peak Bliss score area is outlined by the black rectangle on each synergy plot, with that score given in the box to the right. The EC<sub>50</sub> of prednisolone for each CRISPR mutant is indicated by the horizontal dashed line, demonstrating that peak synergy occurs around the prednisolone EC<sub>50</sub>. The S203A mutation appears to shift the peak synergy to a lower dose of idelalisib without changing the degree of synergy. The S226A mutation significantly decreases the overall Bliss synergy score in comparison to wild-type NALM6 cells.



## SUPPLEMENTAL METHODS

### *Cell viability assays*

Cells were grown in RPMI1640 + 10% FBS at 37°C with 5% CO<sub>2</sub>, diluted to 625,000 cells per mL, and seeded at 9500 cells (15.2 µL) per well in 384 well plates. Dexamethasone (Sigma, D4902-1g) and prednisolone were diluted in DMSO (2500 µM to 20 nM) and then diluted 1:500 in RPMI1640 + 10% FBS. Idelalisib was also diluted in DMSO (50 mM to 48.8 µM) and then diluted 1:100 in RPMI1640 + 10% FBS. Dexamethasone/prednisolone and idelalisib dilutions were added to cells for a final drug to cell volume ratio of 1:1 for dexamethasone/prednisolone (19 µL) and 1:10 for idelalisib (3.8 µL), with final<sub>[DMSO]</sub> = 0.2%. Three replicates for each combination of drug concentrations and cell line were tested. Dexamethasone/prednisolone alone and idelalisib alone were also tested in triplicate. After 72-hour incubation at 37°C, the fraction of cells surviving was measured by adding a resazurin-based reagent (PrestoBlue, ThermoFisher, cat# A13261) in a 1:10 ratio of reagent to specimen and scanned for fluorescence (excitation 560 nm, emission 590 nm) on a Biotek NEO. EC<sub>50</sub> of prednisolone alone and idelalisib alone was calculated using GraphPad Prism (4-parameter fit) for each replicate. AUC was calculated using the PharmacGx package in R<sup>1</sup>. Bliss synergy scores were calculated using SynergyFinder 2.0<sup>2</sup>, with the Bliss reference model quantifying the multiplicative effect of single drugs as if they acted independently. Bliss synergy scores greater than 10 indicate synergy, scores between -10 to 10 indicate additivity, and scores less than -10 indicate antagonism.

B-ALL cells were isolated from the primary patient specimens using Histopaque-1077 (Sigma-Aldrich) for density gradient centrifugation, and freshly isolated B-ALL cells were tested similarly to cell lines with a few modifications. Primary cells were diluted to ~5 million cells per mL in RPMI1640 + 10% FBS and seeded at ~75,000 cells (15.2 µL) per well in 384 well plates. Since glucocorticoid sensitivity was unknown at the time of treatment, prednisolone dilutions in DMSO were from 10 mM to 80 nM prior to diluting 1:500 in RPMI1640 + 10% FBS. The same idelalisib dilutions were used as with the cell lines. Two replicates for each combination of drug concentrations, prednisolone alone, and idelalisib alone were tested for each primary specimen.

NALM6, SUP-B15, and RCH-ACV cells (all obtained from DSMZ) were tested with dexamethasone and ERK1/2 inhibitor SCH772984 (SelleckChem, cat# S7101) similar to the prednisolone/idelalisib combinations. Dexamethasone was diluted 2500 µM to 10 nM in EtOH for NALM6 and SUP-B15 cells and 10000 µM to 80 nM in EtOH for RCH-ACV cells; these were then diluted 1:500 in RPMI1640 + 10% FBS. SCH772984 was diluted 20mM to 312.5 µM in DMSO and then diluted 1:500 in the previous 1:500 dexamethasone dilutions to create all combinations of dexamethasone/SCH772984 concentrations. These dilutions were added 1:1 to cells for final<sub>[DMSO]</sub> = 0.1% and final<sub>[EtOH]</sub> = 0.1%. Cells were also treated for 72 hours prior to assessing their viability.

### *Gene expression analysis of NALM6 cells with dexamethasone and idelalisib*

NALM6 cells were seeded at 7.5e5 cells/mL in 4 mL RPMI1640 + 10% FBS per well of 6 well plates. Cells were allowed to incubate overnight before treatment with vehicle, dexamethasone (5 nM or 50 nM), idelalisib (250 nM), or combination of dexamethasone (both concentrations) and

idelalisib for 3 biological replicates. RNA was extracted after 24-hour treatment using the miRNeasy Mini Kit (Qiagen cat# 217004) per the manufacturer's protocol with on column DNase digestion using Qiagen RNase-free DNase Set (cat# 79254). RNA quality was assessed using Agilent Bioanalyzer. Libraries were prepared using Epicentre ScriptSeq™ Complete Gold Kit (Human/Mouse/Rat)–Low Input (Cat# SCL24G). Sequencing was performed by the Iowa Institute of Human Genetics Genomics Division. Sequencing data was processed using R/Bioconductor and the DESeq2 package. Alpha = 0.01 was used for analysis unless otherwise specified.

### ***Gene expression analysis of primary specimens with glucocorticoids and idelalisib***

Seven primary patient specimens (MAP010, MAP014, MAP015, MAP016, MAP019, MAP020, MAP031) with at least 30 million cells remaining after evaluation of glucocorticoid sensitivity were treated to evaluate glucocorticoid related gene regulation. Freshly isolated primary B-ALL cells were diluted to 1.1 million cells per mL in RPMI1640 + 10% FBS and seeded at 2 million cells per well in 24 well plates. Cells were then treated with vehicle, dexamethasone (final concentration 25-50 nM), prednisolone (25-50 nM), idelalisib (500 nM), combination dexamethasone and idelalisib, or combination prednisolone and idelalisib. After 24-hour incubation, treated cells were resuspended, centrifuged, resuspended in 700 µL QIAzol lysis reagent (Qiagen, cat# 79306), and stored at -80°C until immediately prior to RNA extraction.

For RNA extraction, specimens were thawed at room temperature and homogenized using QIAshredder columns (Qiagen cat# 79654). RNA extraction was performed as described above. RNA was eluted using 35 µL RNase free water. RNA was cleaned using the Zymo RNA Clean & Concentrator-5 kit (cat# R1013) prior to assessing quality using Agilent Bioanalyzer. Libraries were then prepared by the Iowa Institute of Human Genetics Genomics Division using the Illumina TruSeq Stranded mRNA Library Prep kit. Sequencing was performed on Illumina NovaSeq 6000. One replicate of each treatment condition was evaluated for MAP010, MAP016, and MAP020. Two biological replicates of each treatment condition were evaluated for MAP014 (except for dexamethasone + idelalisib which had 1 replicate fail library preparation), MAP015, MAP019, and MAP031.

Sequencing data was processed using R/Bioconductor and the DESeq2 package. Primary specimens were analyzed first altogether, then glucocorticoid sensitive vs. resistant, and later by comparing those found to have an additive response to combination treatment at the concentrations used for this treatment (MAP014 and MAP031) versus those found to have a synergistic response to combination treatment at the concentrations used for this treatment (MAP015 and MAP019). Alpha = 0.01 was used for analysis unless otherwise specified.

### ***Protein expression and purification***

The human GR AF1-DBD (27-506), which contains most of the N-terminal AF1 region and the DBD excluding the hinge, was cloned into a his6-tag containing vector (pET28a). BL21 Gold (DE3) E. coli were transformed with the vector. A single colony was picked and grown at 37°C in 50 ml of standard LB broth (50 µg/mL kanamycin) to an OD600 ~1. One liter LB cultures (50 µg/mL Kan) supplemented with 10 µM ZnCl<sub>2</sub> were inoculated with 10 ml of the starter, grown at

37°C to an OD<sub>600</sub> of 0.3-0.4 before shifting the temperature to 23°C. Once the OD<sub>600</sub> reached 0.8-1, protein expression was induced by adding isopropyl-β-D-thiogalactopyranoside (IPTG, 0.5 mM) for 8 hours. Cells were pelleted by centrifugation (4,000g for 15 minutes in a fixed angle rotor), resuspending in Ni<sup>2+</sup> loading buffer (25 mM Tris, pH 7.5, 500 mM NaCl, 15 mM Imidazole), snap frozen, and stored at -80°C.

Pellets of GR AF1-DBD were thawed, adjusted in volume to 20 mL/L culture Ni<sup>2+</sup> loading buffer, and lysed by passing three times through an Emulsiflex C3. Lysate from up to 6 L of culture was then loaded onto a 5ml HisTrap column (Cytiva), washed, and eluted with a gradient from 15 mM Imidazole to 500 mM Imidazole over 40 mL. GR AF1-DBD fractions were pooled and incubated with 10U Thrombin/mg protein (T4648) in buffer adjusted to contain 2.5 mM CaCl<sub>2</sub> overnight while dialyzing into S-column loading buffer (20 mM Tris, pH 7.5, 50 mM NaCl, 1 mM DTT). In the morning, the protein solution is cleared by spinning (10,000 g for 10 minutes) and then syringe filtering (0.45 μm) before loading onto an HP Sepharose column (Cytiva) and eluting with a gradient from 50 mM to 500 mM NaCl. Fractions are run on a gel and the purest fractions are concentrated and run on a Sepharose 200 column in 20 mM HEPES, pH 7.4, 100 mM NaCl, 1mM DTT, 10% glycerol (Cytiva) to further purify and get rid of soluble aggregates. A concentration is taken by A<sub>260</sub> (ε = 44810), aliquoted, snap frozen, and stored at -80°C.

Erk2 was expressed and purified largely as described<sup>3</sup>. pETHis<sub>6</sub> ERK2+MEK2 R4F plasmid (Addgene #39212) was transformed into BL21 Gold cells and plated on ampicillin (100 mg/mL) containing LB-agar. A single colony was picked into a 50ml starter culture (100 mg/mL ampicillin) and then grown overnight. 15ml of the starter was inoculated into 1L of LB (100 mg/mL ampicillin), grown to an OD<sub>600</sub> = 0.8 at 37°C, then reduced to 30°C and induced with 0.25 mM IPTG for 14 hours. Cells were then pelleted, resuspended in Ni<sup>2+</sup> column loading buffer (20 mL/L culture, 50 mM sodium phosphate, pH 8.0, 0.3 M NaCl, 0.5 mM phenylmethylsulfonyl fluoride (PMSF), 1 μg/ml leupeptin, 1 μM pepstatin, 1 mM benzamidine), frozen in liquid nitrogen, and stored at -80°C. Resuspended pellets were thawed slowly and lysed by passing three times over an Emulsiflex C3. Lysate was cleared by ultracentrifugation for 60 minutes at 40,000 rpm (Ti45 rotor). Cleared lysate was loaded onto a 5 ml HisTrap FF column (Cytiva), washed, and eluted with a gradient to 500 mM Imidazole. Fractions from the elution peak were pooled and dialyzed into MonoQ loading buffer (20 mM Tris-HCl, pH 7.5, 50 mM NaCl, 1 mM dithiothreitol, 1 mM EGTA, 10 mM benzamidine, 0.2 μM pepstatin, 0.5 mM PMSF, and 20% glycerol). The protein solution was diluted 1:1 with loading buffer containing no glycerol (10% glycerol final) and loaded onto a 5/5 MonoQ column (Cytiva), washed, and eluted with a gradient to 500 mM NaCl. Two major peaks were observed, the second of which (elution NaCl ~250 mM) has been shown to be more active. Fractions from this peak were pooled and then run over a gel filtration column in the same buffer to get rid of high molecular weight contaminants. The concentration was calculated by A<sub>260</sub> (ε = 44810), and aliquots were snap frozen in liquid nitrogen and storage at -80°C for future use.

### ***Phosphorylation of GR-AF1-DBD and purification***

GR-AF1-DBD was phosphorylated by Erk2 in 20 mM HEPES, pH 7.4, 10 mM MgCl<sub>2</sub>, 1 mM DTT, 200  $\mu$ M ATP for 30 minutes at 30°C. To favor more highly phosphorylated products, we would phosphorylate 20  $\mu$ M GR-AF1-DBD with 0.2  $\mu$ M Erk2 (100:1). To favor less phosphorylated products, the ratio would be 10,000:1 (20  $\mu$ M GR-AF1-DBD:0.002  $\mu$ M Erk2). Reactions were then diluted 10:1 in MonoQ loading buffer (20 mM Tris-HCl, pH 8.0, 25 mM NaCl, 10% glycerol, 1 mM DTT), loaded onto a 5/5 MonoQ column, and then eluted with a gradient to 250 mM NaCl. Singly phosphorylated GR-AF1-DBD eluted ~130 mM NaCl (12.2 mS/cm), with highly phosphorylated species eluting ~155 mM NaCl (~14.2 mS/cm). Phosphorylated species were then concentrated (Millipore Amicon Ultra, 10 K MWCO), snap frozen, and stored at -80°C.

### ***Mass Spectrometry***

*In Solution Trypsin Digestion:* Five micrograms of each protein sample (GR-AF1-DBD unmodified, phosphorylated, and singly phosphorylated and purified) were reduced at 56°C for 1 hr. in 50  $\mu$ l buffer (20 mM Tris-HCl, 150 mM KCl, 5 mM MgCl<sub>2</sub>, 10 mM DTT, and 1 mM EDTA) and alkylated with 56 mM chloroacetamide (CAA) at RT for 30 min (covered). Sequencing grade Trypsin Gold (Promega) in 50mM in NH<sub>4</sub>HCO<sub>3</sub> was then added to a final concentration of 10 ng/ $\mu$ L and digested overnight at 37°C. Digested samples were acidified to pH 2-3 with 50% trifluoroacetic acid (TFA) and centrifuged at 20,000 x g for 15min to pellet insoluble material. The supernatant peptides were desalted with C18 Stage Tips (Pierce, #87781)<sup>4,5</sup> and eluted in 200 $\mu$ l 70% acetonitrile and 0.1% formic acid, were concentrated by lyophilization and reconstituted in 15 $\mu$ l of Mobile Phase A (MPA, 0.1% formic acid with 3% acetonitrile) for LC-MS/MS analysis.

*LC-MS/MS:* 6  $\mu$ L of peptide digests were auto-loaded by an EZ-nano 1200 UPLC (ThermoFisher) onto a nanocapillary flow path with a 75  $\mu$ m id x 2 cm trap (ThermoFisher, #164535) coupled to a 75 $\mu$ m x 50 cm analytical column (ThermoFisher, #164570) via a S.S. micro-tee (Valco) hosting a split line to waste. Both trap and column are packed with Acclaim PepMap 3  $\mu$ m diameter C-18 coated particles with 100 Å pores. While channeled to waste, the trap was loaded at 2  $\mu$ L/min and washed with 8 trap volumes of MPA and eluted with a linear gradient to MPB (90% CAN 0.1% formic acid) as follows: 300nL/min for 53min to 35% MPB, 10 min to 60% MPB, 8 min to 98%. Following a 7 min purge, MPA was reset to 97% for column reconditioning. A cyclical routine automated on a Q Exactive HF Orbitrap LC-MS/MS System (ThermoFisher) acquiring one MS1 survey scan (380-1800 Th, 60K resolution, AGC 3E06, IT 100ms) followed by 1.2 Th windowed isolations on up to 16 precursor ions. After HCD activation at 28 NCE, fragment spectra are acquired in centroid mode (30K res, 1E5 AGC, 80ms IT) and each precursor was excluded from the cycle for 30 sec.

*Data Analysis:* Data sets were analyzed using the Proteome Discoverer Search engine with a human protein database downloaded from Uniprot (Nov 9, 2018). Sequences were concatenated with a reversed version as a decoy and searched using a 10 ppm mass error for MS1 and MS2 at 2% False Discovery Rate (FDR). Search settings assumed uniform carbamidomethyl alkylation of Cys residues (+57) and variable modifications including phosphorylation of Ser, Thr, Tyr; oxidation of Met; and rare carbamidomethylation of N-terminal peptide sites. The searches were then combined and rescored using Scaffold Q+S (ProteomeSoftware) implementing Percolator with a 1% FDR.



### ***Electrophoretic Mobility Shift Assays (EMSA)***

The dissociation constants for unmodified and phosphorylated GR fragments were measured by electrophoretic mobility shift assay (EMSA). A Cy5-labeled oligo (Integrated DNA Technologies) containing a high-affinity GR binding sequence (5'- GTAC GGAACA TCG TGTACT GTAC -3') and its complement were resuspended in water (100  $\mu$ M final) and mixed 10:1 with 10x annealing buffer (200 nM HEPES, pH 7.4, 1 M NaCl, 50 mM MgCl<sub>2</sub>). The oligos were then heated (95°C, 5 minutes) and slow annealed (to 23°C over 3 hours) for a final duplex concentration of 10  $\mu$ M. The dsDNA was then diluted to 10 nM in binding buffer (20 mM Tris-HCl, pH 8.0, 150 mM KCl, 10% Glycerol, 5 mM MgCl<sub>2</sub>, 1 mM DTT, 1 mM EDTA, 200 ng/ $\mu$ L BSA, 40 ng/ $\mu$ L Salmon Sperm) and dispensed in 10  $\mu$ l aliquots into a row of a 96-well plate. In a separate row, GR protein, diluted from stock with binding buffer to 10  $\mu$ M, was added to the first well of a new row. GR protein was then serially diluted at a 1:2 ratio along the row, with no protein in the last well. 10  $\mu$ l of protein were then added to the DNA row (1:1 ratio) and incubated for 1 hour on ice. The EMSA was run on a 4-20% native PAGE (19:1 Acrylamide/bis-Acrylamide) in 1X TG buffer (25 mM Tris-Cl, 250 mM glycine), visualized (GE LAS4010), and quantified (ImageJ). Binding curves were then fit to fraction bound with hill coefficient (Fraction Bound =  $(B_{\max} * [GR]^h) / (K_d^h + [GR]^h)$ ). Each EMSA was performed  $\geq 3$  repeats, with phosphorylated species compared to unmodified species by t-test.

### ***Phospho-GR western blotting***

NALM6 cells were split into four T75 flasks at a density of 0.6 million cells per mL 18-24 hours prior to treatment. Immediately prior to treatment, dexamethasone and idelalisib dilutions were prepared with final concentrations of dexamethasone 5 nM, dexamethasone 1  $\mu$ M, and idelalisib 250 nM (final<sub>[DMSO]</sub> = 0.1%). One flask was treated with DMSO (vehicle) only, one with dexamethasone only, one with idelalisib only, and one with dexamethasone plus idelalisib. Low dexamethasone (5 nM) and high dexamethasone (1  $\mu$ M) blots were performed separately. Samples (4 mL) were removed from each treated flask 24 hours after treatment.

At each treatment timepoint, cells were centrifuged and medium removed from the cell pellet. Cells were lysed in 200  $\mu$ l lysis buffer supplemented with protease and phosphatase inhibitors (50 mM HEPES pH 7.5, 150 mM NaCl, 1 mM EDTA, 1 mM EGTA, 1 mM NaF, 1% Triton X-100, 10% glycerol, 20 mM  $\beta$ -glycerophosphate, 8 mM sodium pyrophosphate, 1 mM PMSF, 1:500 Calbiochem protease inhibitor cocktail III), vortexed, and incubated on ice for 10 minutes. Lysates were then transferred to 1.5 mL tubes, vortexed again, and centrifuged at 12000 rpm for 15 minutes at 4°C. Supernatants were transferred to new 1.5 mL microcentrifuge tubes. Total protein was quantified based on the Bradford method (Bio-Rad cat# 5000006). SDS sample buffer was added, and each sample was boiled for 3 minutes. Samples were either used immediately or stored at -20°C for future use.

For western blot analysis, 5  $\mu$ g (for 1  $\mu$ M dexamethasone blots) or 10  $\mu$ g (for 5 nM dexamethasone blots) of each sample was loaded in a 15-well Novex Tris-Glycine 4-20% gel (ThermoFisher, cat# XP04205BOX) and electrophoresed at 200V for 45 min in 1X Tris/Glycine/SDS buffer. Gels were transferred to low fluorescence PVDF membrane (Millipore

Immobilon, cat# IPFL00010), using fresh, chilled 1X Tris/glycine buffer for wet transfer at 0.25A for 90 minutes. Each membrane was rinsed with 1X TBS-Tween (0.1%).

Blots with 1  $\mu$ M dexamethasone and blocked with 5% milk in TBS for 1 hour at room temperature. These blots were probed for actin using 1:50000 StrepTactin-HRP (BioRad, #1610381) and imaged on a GE ImageQuant LAS 4000. Blots with 5 nM dexamethasone were stained with Revert total protein (LI-COR, cat# 926-11021) and imaged on an Odyssey Fc. These membranes were then stripped with Revert reversal solution (0.1 M NaOH, 30% methanol) before blocking with Li-COR blocking solution (cat# 927-50000).

Both sets of blots were incubated with primary antibody (1:10000 GR-S203P rabbit polyclonal antibody or 1:1000 GR-S226P rabbit polyclonal antibody, both provided by the Garabedian lab, or 1:500 GR IA-1 rabbit polyclonal antibody, purified at 1  $\mu$ g/ $\mu$ l) overnight at 4°C. Incubation with secondary antibody (1:10000 donkey-anti-rabbit-HRP, GE Healthcare, for 1  $\mu$ M dexamethasone blots and 1:10000 anti-rabbit-680, ThermoFisher, cat#35568 for 5 nM dexamethasone blots) was performed for 1 hour at room temperature. Blots were imaged on GE ImageQuant LAS 4000 (1  $\mu$ M dexamethasone) or Odyssey Fc (5 nM dexamethasone). Quantification of actin/total protein, total GR, and phospho-GR was performed using Image Studio Lite v5.2.

### ***Phospho-GR mutants by CRISPR***

All oligos for CRISPR were obtained from Integrated DNA Technologies with sequences below:

gRNA:

S203A\_1: GAGTTTTCTTCTGGGTCCCC

S203A\_2: CTCATTCGTCTCTTTACCTG

S226A\_1: AAAGTGTGCTTTCTCCTC

S226A\_2: GAATCGTCTTCTCCCGCCAG

HDR templates:

S203A\_1\_donor+:

GGTCTGATCTCCAAGGACTCTCATTCGTCTCTTTACCTGGAGCCCCAGAAGAAAAC  
TCCAAATCCTGCAAAATGTCAAAGGTG

S203A\_1\_donor-:

CACCTTTGACATTTTGCAGGATTTGGAGTTTTCTTCTGGGGCTCCAGGTAAAGAGAC  
GAATGAGAGTCCTTGGAGATCAGACC

S203A\_2\_donor+:

AACAGGTCTGATCTCCAAGGACTCTCATTCGTCTCTTTACCTGGAGCCCCAGAAGAA  
AACTCCAAATCCTGCAAAATGTCAAAGGTG

S203A\_2\_donor-:

CACCTTTGACATTTTGCAGGATTTGGAGTTTCTTCTGGGGCTCCAGGTAAAGAGAC  
GAATGAGAGTCCTTGGAGATCAGACCTGTT

S226A\_1\_donor+:

TTTCCTTCCAAAAGGAATGAATCGTCTTCTCCCGCCAGAGGGGCAAGCAAACAGTTT  
TCATCTATCAACAGGTCTGATCTCCAA

S226A\_2\_donor+:

TCGAGTTTCCTTCCAAAAGGAATGAATCGTCTTCTCCCGCCAGAGGGGCAAGCAAAC  
AGTTTTCATCTATCAACAGGTCTGATCTCCAA

PCR primers:

S203A\_F1a= 5' AGAGAACCCCAAGAGTTCAG 3'

S203A\_R1b= 5' GATCCTTGGCACCTATTCCA 3'

S226A\_F1a= 5' ACTCTGATGTATCTTCAGAACAGC 3'

S226A\_R1b= 5' TAGCCATTAGAAAAAACTGTTCGAC 3'

Cas9 (final concentration 25  $\mu$ M) was combined with gRNA (final concentration 30  $\mu$ M each) and mixed before incubating for 10-20 minutes at room temperature. Nucleofector and supplement were combined in 20  $\mu$ l cuvettes at room temperature. NALM6 cells were resuspended in the solution at 0.2e6 cells per 20  $\mu$ l. Cells, HDR donor oligo (final concentration 4  $\mu$ M each), and electroporation enhancer (final concentration 4  $\mu$ M) were added to the Cas9 mixture and mixed gently. Cells were electroporated with the DS-142 program. Electroporated cells were resuspended in 75  $\mu$ l of warmed media (RPMI1640+10% FBS+1% pen/strep) for total volume of 100  $\mu$ l and transferred into one well of a 96 well plate containing 100  $\mu$ l warmed media with HDR V2 enhancer (final concentration 1  $\mu$ M). Final cell density was 1e6 cells per mL. Cells were incubated at 37°C for 12-24 hours before media was changed to remove HDR V2 enhancer.

After 48-72 hours, editing efficiency was checked with T7EI digest (Integrated DNA Technologies, cat#1075931). PCR reactions were prepared using 5X Phusion HF Buffer (New England Biolabs, cat#B0518S), dNTPs (ThermoFisher, cat#R1122, diluted to final concentration 200  $\mu$ M), PCR primers (final concentration 0.5  $\mu$ M each), and Phusion polymerase (1U/50 $\mu$ l). PCR products were used in the T7EI digestion according to the manufacturer's protocol. After the reaction, products were run on a 10% (29:1 acrylamide/bis-acrylamide) 1X Tris/Glycine PAGE gel for 60 min at 180V. Gel was stained with ethidium bromide and visualized on GE LAS4000 imager with UV box. Edited cells were single cell sorted on Becton Dickinson Aria II into 96 well plates. Clones were allowed to grow prior to extracting genomic DNA. Genomic DNA was then PCR amplified for the edited region using the same protocol as prior to T7EI digest. PCR products were purified with Qiagen MinElute PCR purification kit (cat#28004) following the manufacturer's protocol. Eluted DNA was Sanger sequenced, with control, experimental, and reference PCR products sequenced in parallel for TIDER analysis.

## References

1. Smirnov P, Safikhani Z, El-Hachem N, et al. PharmacoGx: an R package for analysis of large pharmacogenomic datasets. *Bioinformatics*. 2015;32(8):1244-1246.
2. Ianevski A, Giri AK, Aittokallio T. SynergyFinder 2.0: visual analytics of multi-drug combination synergies. *Nucleic Acids Res*. 2020;48(W1):W488-W493.
3. Khokhlatchev A, Xu S, English J, Wu P, Schaefer E, Cobb MH. Reconstitution of mitogen-activated protein kinase phosphorylation cascades in bacteria. Efficient synthesis of active protein kinases. *J Biol Chem*. 1997;272(17):11057-11062.
4. Ishihama Y, Rappsilber J, Mann M. Modular stop and go extraction tips with stacked disks for parallel and multidimensional Peptide fractionation in proteomics. *J Proteome Res*. 2006;5(4):988-994.
5. Yu CL, Summers RM, Li Y, Mohanty SK, Subramanian M, Pope RM. Rapid Identification and Quantitative Validation of a Caffeine-Degrading Pathway in *Pseudomonas* sp. CES. *J Proteome Res*. 2015;14(1):95-106.



| Sample ID | Source | Clinical % Blasts | NCI Risk Group | Karyotype                                                                                                                                   | Fusion Genes Identified (if any) | Cytogenetics Grouping (non-infants/relapse) |
|-----------|--------|-------------------|----------------|---------------------------------------------------------------------------------------------------------------------------------------------|----------------------------------|---------------------------------------------|
| MAP010    | BM     | 87                | SR             | 29,XY,+4,+8,+10,+18,+21[20]                                                                                                                 |                                  | Unfavorable                                 |
| MAP011    | BM     | 65                | SR             | 56,XY,+X,+Y,+4,+6,+10,+14,+17,+18,der(19)t(1;19)(q23;p13.3),+21,+21[12]                                                                     | TCF3::PBX1                       | Favorable                                   |
| MAP012    | BM     | 95                | SR             | 46,XY,t(6;8)(q25;q11.2)[8]                                                                                                                  |                                  | Neutral                                     |
| MAP013    | BM     | 82                | SR             | 47,XY,dic(9;20)(p13;q11.2),+10,+21[4]/48,idem,+21[5]/48,idem,+X[3]/49,idem,+X,+21[2]                                                        |                                  | Neutral                                     |
| MAP014    | PB     | 82                | HR             | 46,XX,i(9)(q10),t(12;13)(p13;q12)[23]                                                                                                       | ETV6::FLT3                       | Neutral                                     |
| MAP015    | PB     | 94                | HR             | 46,XY,del(9)(p13)x2,der(10)t(9;10)(p22;p15),der(12)t(9;12)(p22;q24.3),dup(16)(q13q11.2)[19]                                                 |                                  | Neutral                                     |
| MAP016    | BM     | 89                | SR             | 46,XY[20]                                                                                                                                   | ETV6::RUNX1                      | Favorable                                   |
| MAP017    | BM     | 80                | HR             | 46,XX,der(2)t(2;9)(p11.2;q13),der(14)t(2;14)(p11.2;q32),dup(21)(q22)iAMP21[11]                                                              |                                  | Unfavorable                                 |
| MAP018    | BM     | 66                | N/A (infant)   | 47,XX,add(2)(q33),der(3)t(3;5)(p26;q11.2),+6,del(10)(q24)[15]                                                                               | BCR::ABL1                        | N/A                                         |
| MAP019    | BM     | 85                | N/A (relapse)  | 49~50,Y,dup(X)(p11.2p22.1),+dup(X)(p11.2p22.1),t(1;7;5)(q21;p11.2;q11.2),del(6)(q23q27),+8,+9,+10,i(21)(q10),+mar[9]                        |                                  | N/A                                         |
| MAP020    | BM     | 98                | HR             | 46,XY,i(7)(q10)[14]                                                                                                                         | P2RY8::CRLF2                     | Ph-like                                     |
| MAP021    | BM     | 91                | HR             | 46,XY,der(19)t(1;19)(q23;p13.3)[10]                                                                                                         | TCF3::PBX1                       | Neutral                                     |
| MAP023    | BM     | 99                | HR             | 46,XX,add(12)(p11.2)[4]                                                                                                                     | ETV6::RUNX1                      | Favorable                                   |
| MAP025    | BM     | 97                | N/A (infant)   | 48,XX,+X,t(4;11)(q21;q23),+21[17]                                                                                                           | KMT2A::AFF1                      | N/A                                         |
| MAP031    | BM     | 89                | HR             | 46,XY,t(7;15)(q22;q13)[18]                                                                                                                  |                                  | Neutral                                     |
| MAP032    | BM     | 92                | SR             | 54,XY,+X,+4,+6,+14,+17,+18,+21,+21[13]                                                                                                      |                                  | Neutral                                     |
| MAP033    | BM     | 97                | SR             | 46,XY,dup(21)(q22)iAMP21[4]/46,XY,add(9)(p13),dup(21)(q22)iAMP21[8]                                                                         |                                  | Unfavorable                                 |
| MAP035    | PB     | 90                | HR             | 46,XX,t(4;11)(q21;q23)[10]/47,XX,+X,t(4;11)(q21;q23)[6]/47,XX,+X,t(4;11)(q21;q23),del(17)(p11.2)[5]/47,XX,+X,t(4;11)(q21;q23),i(17)(q10)[5] | KMT2A::AFF1                      | Unfavorable                                 |
| MAP036    | BM     | 93                | SR             | 47,XX,+10[4]                                                                                                                                | ETV6::RUNX1                      | Favorable                                   |
| MAP039    | BM     | 96                | SR             | 46,XY,t(1;3)(p34;q29)[24]                                                                                                                   | ETV6::RUNX1                      | Favorable                                   |

**Table S1. Characteristics of primary patient specimens.** BM = bone marrow aspirate. PB = peripheral blood. Clinical % blasts indicates the percentage of blasts in the bone marrow or peripheral blood specimen determined clinically at the time of specimen collection. SR = standard risk. HR = high risk. Ph-like = Philadelphia chromosome-like ALL.

| Gene    | Log2 Fold Change with 50nM Dex | Screen Phenotype |
|---------|--------------------------------|------------------|
| NR3C1   | 1.129947279                    | 0.998019174      |
| NCOR2   | 1.0103191                      | 0.400499412      |
| TCF3    | 0.212719084                    | 0.531101476      |
| TRIP12  | 0.350989806                    | 0.315524534      |
| KAT6A   | 0.264583814                    | 0.455455254      |
| NCOR1   | 0.444274357                    | 0.531481962      |
| GPS2    | 0.423298552                    | 0.334240629      |
| NCOA1   | 0.632939634                    | 0.3178194        |
| DDX17   | 0.413690919                    | 0.074999559      |
| ZNF592  | 0.813638405                    | 0.394779842      |
| BCL2L11 | 1.114891533                    | 0.265009516      |
| ARID1A  | 0.371997379                    | 0.338414391      |
| NKTR    | 0.27800393                     | 0.32458471       |
| SETD1B  | 0.772636417                    | 0.142520354      |
| UBE2V1  | 0.326098713                    | 0.087849676      |
| HELZ    | 0.469395109                    | 0.33976174       |
| KIF1C   | 0.484704339                    | 0.010654748      |
| SNN     | 0.645638026                    | 0.182118532      |
| RAB5C   | 0.361174876                    | 0.21392928       |
| MED13L  | 0.608900741                    | 0.285803227      |
| ERLIN2  | 0.42217714                     | 0.116513464      |
| BMF     | 4.18793177                     | 0.410481624      |
| AFF1    | 0.941777597                    | 0.089355658      |
| PPP6R3  | 0.496508431                    | 0.298601121      |
| BIRC6   | 0.3529629                      | 0.011858095      |
| PCGF3   | 0.481364293                    | 0.26222794       |
| LAPTM5  | 0.908834258                    | 0.225892787      |
| TADA3   | 0.730576961                    | 0.353623977      |
| MED24   | 0.571802056                    | 0.509794036      |
| GNA13   | 0.271357985                    | 0.191153257      |
| USP19   | 0.452384901                    | 0.176758223      |
| DDX6    | 0.221815231                    | 0.353756627      |
| ZMYM4   | 0.325900338                    | 0.178021651      |
| ITPKB   | 0.430737367                    | 0.156258067      |
| SDE2    | 0.299691746                    | 0.289492286      |
| CD72    | 1.917252565                    | 0.191689426      |
| YTHDC1  | 0.31670777                     | 0.114965401      |
| GOLGA8A | 0.483173555                    | 0.267896256      |

|         |             |             |
|---------|-------------|-------------|
| MT2A    | 0.518741673 | 0.277936592 |
| UTRN    | 0.414901764 | 0.114246787 |
| CD74    | 0.897726599 | 0.319921401 |
| ARID4A  | 0.557281039 | 0.079339525 |
| MDM4    | 0.400079606 | 0.137919589 |
| DISP1   | 0.773541095 | 0.273947063 |
| GLUL    | 1.127190419 | 0.283281814 |
| TNNI2   | 5.357278771 | 0.360487963 |
| PIAS1   | 0.51801577  | 0.082559794 |
| NKAIN4  | 0.857235345 | 0.256362001 |
| PLEKHA2 | 0.267818889 | 0.289528096 |
| SPATA9  | 3.126715033 | 0.217078653 |
| MPPE1   | 0.692653649 | 0.197709268 |
| BECN1   | 0.238043795 | 0.217708769 |
| WDR26   | 0.351572713 | 0.089585714 |
| DMXL1   | 0.481571681 | 0.277516238 |
| NAV1    | 0.273705643 | 0.227496439 |
| CYP3A5  | 0.701376725 | 0.34684587  |
| YIPF3   | 0.805642605 | 0.069816296 |
| RASSF4  | 5.136331026 | 0.149637146 |
| ATP11A  | 0.406236676 | 0.257377136 |
| CPS1    | 0.425654452 | 0.071545292 |
| MAGED4  | 3.026490011 | 0.174426836 |
| PAG1    | 0.846559528 | 0.246944725 |
| TTLL3   | 0.538275787 | 0.235482694 |
| PRDM1   | 3.331907026 | 0.282467001 |
| TCN2    | 2.281704137 | 0.125541603 |
| DDHD1   | 0.387916231 | 0.065333776 |
| TTC14   | 0.455355461 | 0.159652684 |
| DOK4    | 1.746715046 | 0.211037827 |
| VPS45   | 0.396547183 | 0.09589402  |
| DNASE1  | 0.48640795  | 0.330198434 |
| LRRC39  | 0.727109605 | 0.102499616 |
| HIGD1B  | 6.437713053 | 0.048719912 |
| SLFN5   | 1.998482062 | 0.046640726 |
| AKIRIN2 | 0.547317461 | 0.099056326 |
| YBX3    | 1.418937979 | 0.133789957 |
| SAFB2   | 0.348149422 | 0.44797162  |
| MFSD11  | 0.655926064 | 0.234709071 |

|          |             |             |
|----------|-------------|-------------|
| PHF8     | 1.04238251  | 0.319835758 |
| ASB3     | 0.231103662 | 0.203886243 |
| PAXIP1   | 0.844566872 | 0.132193044 |
| KLC4     | 0.547006107 | 0.329912981 |
| RNF31    | 0.405856872 | 0.086177552 |
| CHKB     | 0.859020692 | 0.334847227 |
| PRDM11   | 1.610806427 | 0.246001806 |
| DIP2C    | 1.522337071 | 0.322916977 |
| TMEM106A | 0.794987474 | 0.278557211 |
| TMEM214  | 0.496873543 | 0.231038321 |
| TGOLN2   | 0.220634229 | 0.057713929 |

**Table S2A: Positive Effector Genes.** This table shows the intersection of the set of genes upregulated ( $\text{adjp} \leq 0.05$ ) in NALM6 cells treated with higher dose dexamethasone (50 nM Dex) with the set of genes with a positive phenotype (meaning contributing to dexamethasone-induced cell death) from our genome-wide shRNA screen. Upregulation of each gene is modeled to contribute to dexamethasone-induced cell death. Genes are ranked by significance of the phenotype (not shown).

| Gene   | Log2 Fold Change with 50nM Dex | Screen Phenotype |
|--------|--------------------------------|------------------|
| MBNL1  | -0.38873347                    | -0.399080764     |
| NUP153 | -0.405485208                   | -0.439408595     |
| CTCF   | -0.223221101                   | -0.524249171     |
| TCERG1 | -0.240320954                   | -0.37893135      |
| AHCTF1 | -0.487793069                   | -0.341400418     |
| CS     | -0.2506042                     | -0.305489563     |
| ZBTB33 | -0.240803232                   | -0.343004389     |
| DAZAP1 | -0.261479268                   | -0.356056635     |
| PAX5   | -0.627942746                   | -0.374076749     |
| U2AF2  | -0.548074341                   | -0.323044549     |
| BCL2   | -1.534811903                   | -0.435740423     |
| THAP11 | -0.345644396                   | -0.269877259     |
| EIF3J  | -0.384247945                   | -0.364122208     |
| PIK3CD | -0.628700797                   | -0.318161018     |
| MEF2C  | -0.401521777                   | -0.293278915     |
| NCAPH  | -0.218318498                   | -0.188847578     |
| CCND3  | -0.596595347                   | -0.362963361     |
| EIF3I  | -0.541658314                   | -0.102781228     |



|         |              |              |
|---------|--------------|--------------|
| KPNB1   | -0.435286351 | -0.086582065 |
| LEF1    | -1.372405174 | -0.054216607 |
| SLC25A5 | -0.245704403 | -0.27667     |
| ODC1    | -0.850244198 | -0.316348471 |
| PSMB5   | -0.488030291 | -0.040513361 |
| TOMM34  | -0.459833707 | -0.19016298  |
| CREG1   | -0.571697457 | -0.320354864 |
| CYP27B1 | -1.828541699 | -0.3092194   |
| XAF1    | -0.819516192 | -0.218857998 |
| LSM6    | -0.362324682 | -0.38803014  |
| CFDP1   | -0.323089647 | -0.282424653 |
| DEK     | -0.367694861 | -0.092970654 |
| UBA1    | -0.244270723 | -0.295517172 |
| PSMD13  | -0.272755068 | -0.301532593 |
| IARS2   | -0.408579983 | -0.308634027 |
| NAF1    | -0.511875069 | -0.36694396  |
| IKZF2   | -0.818885042 | -0.140759446 |
| ASNS    | -0.856984439 | -0.276440346 |
| NANP    | -0.316155453 | -0.109209177 |
| SNRPF   | -0.571737774 | -0.175515023 |
| U2AF1   | -0.266898837 | -0.284413745 |
| NAA25   | -0.539785666 | -0.290499593 |
| PSME3   | -0.36396081  | -0.28910883  |
| PSMA2   | -0.412881734 | -0.366351523 |
| ETF1    | -0.439875811 | -0.26536202  |
| TSR1    | -0.524879852 | -0.243294346 |
| EIF5A   | -0.719875685 | -0.33999652  |
| ZFP36L1 | -0.677647948 | -0.266019918 |
| SMC2    | -0.333281408 | -0.400463058 |
| LRPPRC  | -0.383267905 | -0.342400654 |
| PSMD1   | -0.284612403 | -0.298361164 |
| PSMA7   | -0.462816575 | -0.31175686  |
| TFAM    | -0.533270294 | -0.401943021 |
| WDR43   | -0.367911541 | -0.360655645 |
| BYSL    | -0.973889829 | -0.350896884 |
| POLR1B  | -0.678306709 | -0.285790958 |
| CEBPZ   | -0.259967912 | -0.084534457 |
| CARM1   | -0.673801562 | -0.252156164 |
| HNRNPF  | -0.399803212 | -0.328283678 |

|          |              |              |
|----------|--------------|--------------|
| SET      | -0.449350454 | -0.300927743 |
| DDX18    | -0.494961678 | -0.22918775  |
| TMEM11   | -0.375698363 | -0.349879557 |
| ERCC6L   | -0.530244306 | -0.072627543 |
| PNO1     | -0.641936265 | -0.295685961 |
| POLD3    | -0.286757618 | -0.237216633 |
| MRPL13   | -0.520519625 | -0.042322619 |
| DPY30    | -0.500385699 | -0.292875924 |
| PRIM1    | -0.565544086 | -0.30498711  |
| HDAC2    | -0.327067292 | -0.326280038 |
| DDX50    | -0.301940801 | -0.12188307  |
| ACADM    | -0.35270397  | -0.275305436 |
| ZFR      | -0.299197759 | -0.132933201 |
| SFXN1    | -0.481939426 | -0.187508845 |
| GTF3A    | -0.25343591  | -0.283577371 |
| TP53RK   | -0.243226062 | -0.244165188 |
| ACSL4    | -0.339685249 | -0.096621128 |
| BRCA2    | -0.432215062 | -0.347950242 |
| ESD      | -0.371077113 | -0.250512906 |
| C1QBP    | -0.608815913 | -0.128796941 |
| XRCC2    | -0.732430207 | -0.239096266 |
| KDM1A    | -0.379880399 | -0.281137519 |
| TEAD4    | -0.958246261 | -0.227342731 |
| RPS27L   | -0.44197907  | -0.2800026   |
| TUFM     | -0.275400663 | -0.403280033 |
| BHLHE40  | -0.969779825 | -0.308311663 |
| CBFB     | -0.286946045 | -0.105476109 |
| HIF1A    | -0.275205247 | -0.154125302 |
| AKAP1    | -0.467881829 | -0.328694129 |
| MSH2     | -0.414150603 | -0.056791155 |
| DDX39A   | -0.334569189 | -0.104735623 |
| NUP107   | -0.200895813 | -0.311933203 |
| PWP1     | -0.322065118 | -0.06561147  |
| ANP32A   | -0.300411397 | -0.000925732 |
| CCNA2    | -0.401240221 | -0.258833711 |
| SNAPC1   | -0.611020929 | -0.073791913 |
| AIP      | -0.365159536 | -0.248705445 |
| LGALS3BP | -1.031720771 | -0.102449586 |
| AMMECR1  | -1.252138893 | -0.269326102 |

|          |              |              |
|----------|--------------|--------------|
| NCAPG    | -0.293099604 | -0.383112125 |
| PUF60    | -0.542155456 | -0.053419241 |
| MAPKAPK5 | -0.409034543 | -0.093171906 |
| CBR1     | -0.926342149 | -0.099168652 |
| SRSF2    | -0.245976816 | -0.20285831  |
| RUVBL1   | -0.489236797 | -0.094602185 |
| PA2G4    | -0.63507859  | -0.231584862 |
| FANCB    | -0.649610925 | -0.173557611 |
| RCC1     | -0.714798295 | -0.369181294 |
| SFXN3    | -0.426765857 | -0.344642711 |
| HAUS1    | -0.216276033 | -0.263290897 |
| CGREF1   | -0.648438926 | -0.08779445  |
| TMEM126A | -0.537203696 | -0.224218224 |
| PSMA3    | -0.741745347 | -0.226243312 |
| DIS3L    | -0.382866164 | -0.081470744 |
| PARPBP   | -0.434224179 | -0.33520505  |
| SNRPE    | -0.528817915 | -0.031686721 |
| CBX4     | -0.706002663 | -0.354953337 |
| PRR3     | -0.579798052 | -0.165591202 |
| MYO19    | -0.340452902 | -0.060605128 |
| HDDC2    | -0.339180143 | -0.098717465 |
| MRPS27   | -0.342411091 | -0.144749788 |
| PPP2R1B  | -0.415345087 | -0.226312483 |
| WDR61    | -0.386915296 | -0.084596546 |
| SRSF7    | -0.524938444 | -0.344866239 |
| BLNK     | -0.374984773 | -0.072907524 |
| MDM2     | -0.622620157 | -0.306767959 |
| MILR1    | -0.586388886 | -0.24488968  |
| CD9      | -0.386514185 | -0.298034931 |
| TDG      | -0.283585408 | -0.305784243 |
| PIK3C2B  | -0.748072484 | -0.373648286 |
| HNRNPU   | -0.450377669 | -0.09718176  |
| BRCA1    | -0.303466226 | -0.259040509 |
| NOP10    | -0.405639265 | -0.259386648 |
| MATR3    | -0.30352306  | -0.048991735 |
| CD19     | -0.394774021 | -0.079173995 |
| PRDX3    | -0.470683733 | -0.053819522 |
| PSMA5    | -0.482298669 | -0.05672641  |
| CSTF2    | -0.453408418 | -0.083154227 |

|                |              |              |
|----------------|--------------|--------------|
| <b>LIN7C</b>   | -0.264296931 | -0.214370835 |
| <b>BOP1</b>    | -0.517115171 | -0.297535637 |
| <b>POLR1A</b>  | -0.284075524 | -0.155418588 |
| <b>ZNF43</b>   | -0.366877005 | -0.369779214 |
| <b>PCNP</b>    | -0.298111407 | -0.248840637 |
| <b>MYBBP1A</b> | -0.63510918  | -0.329606394 |
| <b>CYC1</b>    | -0.467386008 | -0.142080423 |
| <b>IRF2</b>    | -0.479184043 | -0.352041062 |
| <b>SNRPD3</b>  | -0.472651757 | -0.323950497 |
| <b>LRFN1</b>   | -1.207668718 | -0.364654442 |
| <b>TRIB3</b>   | -1.582777284 | -0.133805856 |
| <b>MME</b>     | -0.835898779 | -0.412681241 |
| <b>ECHS1</b>   | -0.527356745 | -0.19675946  |

**Table S2B: Negative Effector Genes.** This table shows the intersection of the set of genes upregulated ( $\text{adjp} \leq 0.05$ ) in NALM6 cells treated with higher dose dexamethasone (50 nM Dex) with the set of genes with a positive phenotype (meaning contributing to dexamethasone-induced cell death) from our genome-wide shRNA screen. Downregulation of each gene is modeled to contribute to dexamethasone-induced cell death. Genes are ranked by significance of the phenotype (not shown).

| Additive Effectors - Dexamethasone | Synergistic Effectors - Dexamethasone | Overlapping Effectors - Dexamethasone | Additive Effectors - Prednisolone | Synergistic Effectors - Prednisolone | Overlapping Effectors - Prednisolone |
|------------------------------------|---------------------------------------|---------------------------------------|-----------------------------------|--------------------------------------|--------------------------------------|
| ACADM                              | AFF1                                  | AFF1                                  | ACADM                             | AFF1                                 | AFF1                                 |
| ADNP                               | ANKRD11                               | ARID1A                                | AFF1                              | BCOR                                 | EP300                                |
| AFF1                               | ARID1A                                | BCL2L11                               | ARID1A                            | C17orf49                             | IRAK4                                |
| ARID1A                             | BBX                                   | BCOR                                  | BCL2                              | EP300                                | MBNL1                                |
| BCL2                               | BCL2L11                               | BMF                                   | BMF                               | ETV6                                 | PAX5                                 |
| BCL2L11                            | BCOR                                  | BRD2                                  | BOP1                              | IRAK4                                | POU2F1                               |
| BCOR                               | BMF                                   | BRD4                                  | CARM1                             | LEF1                                 | PRR12                                |
| BIRC5                              | BRD2                                  | C17orf49                              | CHAMP1                            | MBNL1                                | RUVBL1                               |
| BMF                                | BRD4                                  | CD79A                                 | CREBBP                            | MTMR4                                | SPEN                                 |
| BOP1                               | C17orf49                              | CHAMP1                                | DLGAP5                            | NCOA1                                | SRRM1                                |
| BRD2                               | CARS2                                 | EHMT2                                 | DOLPP1                            | NUP214                               | SSRP1                                |
| BRD4                               | CD79A                                 | EP300                                 | EHMT2                             | PAX5                                 |                                      |
| C17orf49                           | CDC42                                 | ETV6                                  | EIF3I                             | POU2F1                               |                                      |
| CARM1                              | CHAMP1                                | GPS2                                  | EP300                             | PRR12                                |                                      |
| CD79A                              | CNOT2                                 | GSK3A                                 | IRAK4                             | RUVBL1                               |                                      |
| CELF1                              | CPEB3                                 | HIF1A                                 | LARP1                             | SPEN                                 |                                      |
| CHAMP1                             | CREBBP                                | IRAK4                                 | MBNL1                             | SPI1                                 |                                      |
| CTCF                               | EBF1                                  | KAT6A                                 | NLE1                              | SRRM1                                |                                      |
| DLGAP5                             | EHMT2                                 | MBNL1                                 | NOL6                              | SSRP1                                |                                      |
| DOLPP1                             | EIF4E2                                | MEF2A                                 | NR3C1                             | SYK                                  |                                      |
| EHMT2                              | EP300                                 | MMP14                                 | PAX5                              | ZNF608                               |                                      |
| EIF2B1                             | ETV6                                  | MSI2                                  | PDCD5                             |                                      |                                      |
| EIF3I                              | GPS2                                  | NCK1                                  | PIK3CD                            |                                      |                                      |
| EIF3L                              | GSK3A                                 | NCOR2                                 | PLAGL2                            |                                      |                                      |
| EP300                              | HIF1A                                 | PAX5                                  | POU2F1                            |                                      |                                      |
| ETV6                               | IRAK4                                 | PIK3CD                                | PPP5C                             |                                      |                                      |
| GPS2                               | KAT6A                                 | POLG                                  | PRDM1                             |                                      |                                      |
| GSK3A                              | LEF1                                  | POU2F1                                | PREX1                             |                                      |                                      |
| HIF1A                              | MBNL1                                 | PRDM1                                 | PRR12                             |                                      |                                      |
| IRAK4                              | MED23                                 | PREX1                                 | PTBP1                             |                                      |                                      |
| ITPKB                              | MEF2A                                 | PRR12                                 | RRP12                             |                                      |                                      |
| KAT6A                              | MMP14                                 | RRP12                                 | RUVBL1                            |                                      |                                      |
| LARP1                              | MSI2                                  | RUVBL1                                | SAFB2                             |                                      |                                      |
| MAML2                              | MTMR4                                 | SAFB2                                 | SPEN                              |                                      |                                      |
| MAPK1                              | NCK1                                  | SPEN                                  | SRRM1                             |                                      |                                      |
| MBNL1                              | NCOA1                                 | SRRM1                                 | SSRP1                             |                                      |                                      |
| MED11                              | NCOR2                                 | SSRP1                                 | SUPT16H                           |                                      |                                      |
| MED13                              | NUP214                                | ZMIZ1                                 | YTHDC1                            |                                      |                                      |
| MEF2A                              | PARD6B                                | ZNF592                                | ZNF320                            |                                      |                                      |
| MMP14                              | PAX5                                  |                                       | ZNF638                            |                                      |                                      |

|          |        |  |        |  |  |
|----------|--------|--|--------|--|--|
| MSI2     | PHF6   |  | ZNF671 |  |  |
| NCK1     | PIK3CD |  |        |  |  |
| NCOA2    | POLG   |  |        |  |  |
| NCOR2    | POU2F1 |  |        |  |  |
| NELFCD   | PRDM1  |  |        |  |  |
| NLE1     | PREX1  |  |        |  |  |
| NOL6     | PRKAB1 |  |        |  |  |
| NR3C1    | PRR12  |  |        |  |  |
| PAX5     | RGS9   |  |        |  |  |
| PDCD5    | RRP12  |  |        |  |  |
| PHC3     | RUVBL1 |  |        |  |  |
| PIK3CD   | SAFB2  |  |        |  |  |
| PLAGL2   | SESN3  |  |        |  |  |
| POLG     | SPEN   |  |        |  |  |
| POU2F1   | SPI1   |  |        |  |  |
| PPP1R12A | SRRM1  |  |        |  |  |
| PPP5C    | SSRP1  |  |        |  |  |
| PRC1     | SYK    |  |        |  |  |
| PRDM1    | TAF3   |  |        |  |  |
| PREX1    | ZMIZ1  |  |        |  |  |
| PRR12    | ZNF592 |  |        |  |  |
| PTBP1    | ZNF608 |  |        |  |  |
| RASSF4   |        |  |        |  |  |
| RAVER1   |        |  |        |  |  |
| RBMX2    |        |  |        |  |  |
| RRP12    |        |  |        |  |  |
| RUVBL1   |        |  |        |  |  |
| SAFB     |        |  |        |  |  |
| SAFB2    |        |  |        |  |  |
| SETD1A   |        |  |        |  |  |
| SPEN     |        |  |        |  |  |
| SRRM1    |        |  |        |  |  |
| SSRP1    |        |  |        |  |  |
| SUPT16H  |        |  |        |  |  |
| TADA3    |        |  |        |  |  |
| THOC2    |        |  |        |  |  |
| WIZ      |        |  |        |  |  |
| YTHDC1   |        |  |        |  |  |
| ZBED4    |        |  |        |  |  |
| ZMIZ1    |        |  |        |  |  |
| ZMYM4    |        |  |        |  |  |
| ZMYND8   |        |  |        |  |  |
| ZNF320   |        |  |        |  |  |



|        |  |  |  |  |  |
|--------|--|--|--|--|--|
| ZNF592 |  |  |  |  |  |
| ZNF638 |  |  |  |  |  |
| ZNF671 |  |  |  |  |  |

**Table S3: Effector Genes in Primary Patient Specimens.** Genes significantly regulated (adjp  $\leq 0.01$ ) in primary patient specimens treated with dexamethasone or prednisolone were intersected with genes which had a significant phenotype (p value  $< 0.05$ ) in our genome-wide shRNA screens. These effector genes were identified for both dexamethasone and prednisolone in primary specimens defined as having an additive response to prednisolone with idelalisib in cell viability assays (Additive Effectors) and in specimens with a synergistic response in viability assays (Synergistic Effectors). Overlapping effectors were determined by intersecting the additive effectors and synergistic effectors for dexamethasone or prednisolone.
