# Supplementary material for: PI3Kδ Inhibition Potentiates Glucocorticoids in B-lymphoblastic Leukemia by Decreasing Receptor Phosphorylation and Enhancing Gene Regulation
Source: MDPI journal article supplement (doi:10.3390/cancers16010143), 2023-12-27
Supplement: s1 [file s1]

# Dex+Idela RNAseq

Miles Pufall

1/6/2023

## Background

This is an R Markdown document. Markdown is a simple formatting syntax for authoring HTML, PDF, and MS Word documents. For more details on using R Markdown see <http://rmarkdown.rstudio.com> (<http://rmarkdown.rstudio.com>).

When you click the **Knit** button a document will be generated that includes both content as well as the output of any embedded R code chunks within the document. You can embed an R code chunk like this:

## Read in Screen Results

```
full_rhos <- readxl::read_excel("~/Library/CloudStorage/Dropbox/miles/screen/full_rhos_180815.xlsx")
sig_rhos <- dplyr::filter(full_rhos, Rho.P.value < 0.05)
full_gammas <- read_csv("~/Library/CloudStorage/Dropbox/miles/screen/full_gammas_180815.csv")
sig_gammas <- dplyr::filter(full_gammas, Gamma.P.value < 0.01)

cagek_rhos <- readxl::read_excel("~/Library/CloudStorage/Dropbox/miles/screen/CAGEK_rhos_1508.xlsx")
c_sig_rhos <- dplyr::filter(cagek_rhos, `Rho P value` < 0.05)
cagek_gammas <- readxl::read_excel("~/Library/CloudStorage/Dropbox/miles/screen/CAGEK_rhos_1508.xlsx", sheet = 2)
c_sig_gammas <- dplyr::filter(cagek_gammas, `Gamma P value` < 0.01)
```

## Import RNA-seq data

### Identify count tables

```
cond <- read_csv("cond_idel.csv") %>%
  mutate(sample = replace(sample, sample=="Hb3_quant", "hb3_quant")) %>%
  mutate(dex = as.factor(dex)) %>%
  mutate(idela = as.factor(idela)) %>%
  rename(names = sample)
```

```
## Rows: 18 Columns: 4
## — Column specification —————
## Delimiter: ","
## chr (2): sample, condition
## dbl (2): dex, idela
##
## i Use `spec()` to retrieve the full column specification for this data.
## i Specify the column types or set `show_col_types = FALSE` to quiet this message.
```

```
cond$files <- file.path("salm", "quants", cond$names, "quant.sf")
cond <- as_tibble(cond)

file.exists(cond$files)
```

```
## [1] TRUE TRUE
## [16] TRUE TRUE TRUE
```

```
se <- tximeta(cond)
```

```
## importing quantifications
## reading in files with read_tsv
## 1 2 3 4 5 6 7 8 9 10 11 12 13 14 15 16 17 18
## found matching transcriptome:
## [ GENCODE - Homo sapiens - release 42 ]
## loading existing TxDb created: 2022-12-30 00:09:26
## loading existing transcript ranges created: 2022-12-30 00:09:27
## fetching genome info for GENCODE
```

```
dim(se)
```

```
## [1] 251550      18
```

## Import into DESeq

```
gse <- summarizeToGene(se)
```

```
## loading existing TxDb created: 2022-12-30 00:09:26
```

```
## obtaining transcript-to-gene mapping from database
```

```
## loading existing gene ranges created: 2022-12-30 00:10:30
```

```
## summarizing abundance
```

```
## summarizing counts
```

```
## summarizing length
```

```
dim(gse)
```

```
## [1] 62262      18
```

```
round( colSums(assay(gse)) / 1e6, 1 )
```

```
## veh1_quant veh2_quant veh3_quant lb1_quant lb2_quant lb3_quant hb1_quant
##      18.1      23.0      21.4      24.1      20.0      30.9      19.8
## hb2_quant hb3_quant ide1_quant ide2_quant ide3_quant lo1_quant lo2_quant
##      17.5      28.0      21.8      27.6      23.9      21.4      24.0
## lo3_quant hi1_quant hi2_quant hi3_quant
##      26.3      18.6      19.7      29.9
```

```
#Export count table
count_table <- round(assays(gse)$counts, 0) %>%
  as_tibble(rownames = "ensembl")
write_csv(count_table, "nalm6_idela_gene_count_table.csv")

dds <- DESeqDataSet(gse, ~dex + idela + dex:idela)
```

```
## using counts and average transcript lengths from tximeta
```

```
dds$group <- factor(paste0(dds$dex, dds$idela))
design(dds) <- ~ group
```

## Pre filter

```
dds <- dds[ rowSums(counts(dds)) > 36, ]
nrow(dds)
```

```
## [1] 21242
```

## Exploratory Data Analysis

### Sample comparison heatmap

```
vsd <- vst(dds, blind = FALSE) #fast
```

```
## using 'avgTxLength' from assays(dds), correcting for library size
```

```
dds <- estimateSizeFactors(dds)
```

```
## using 'avgTxLength' from assays(dds), correcting for library size
```

```

sampleDists <- dist(t(assay(vsd)))

sampleDistMatrix <- as.matrix( sampleDists )
rownames(sampleDistMatrix) <- vsd$names
colnames(sampleDistMatrix) <- NULL
colors <- colorRampPalette( rev(brewer.pal(9, "Blues")) )(255)
pheatmap(sampleDistMatrix,
          clustering_distance_rows = sampleDists,
          clustering_distance_cols = sampleDists)

```

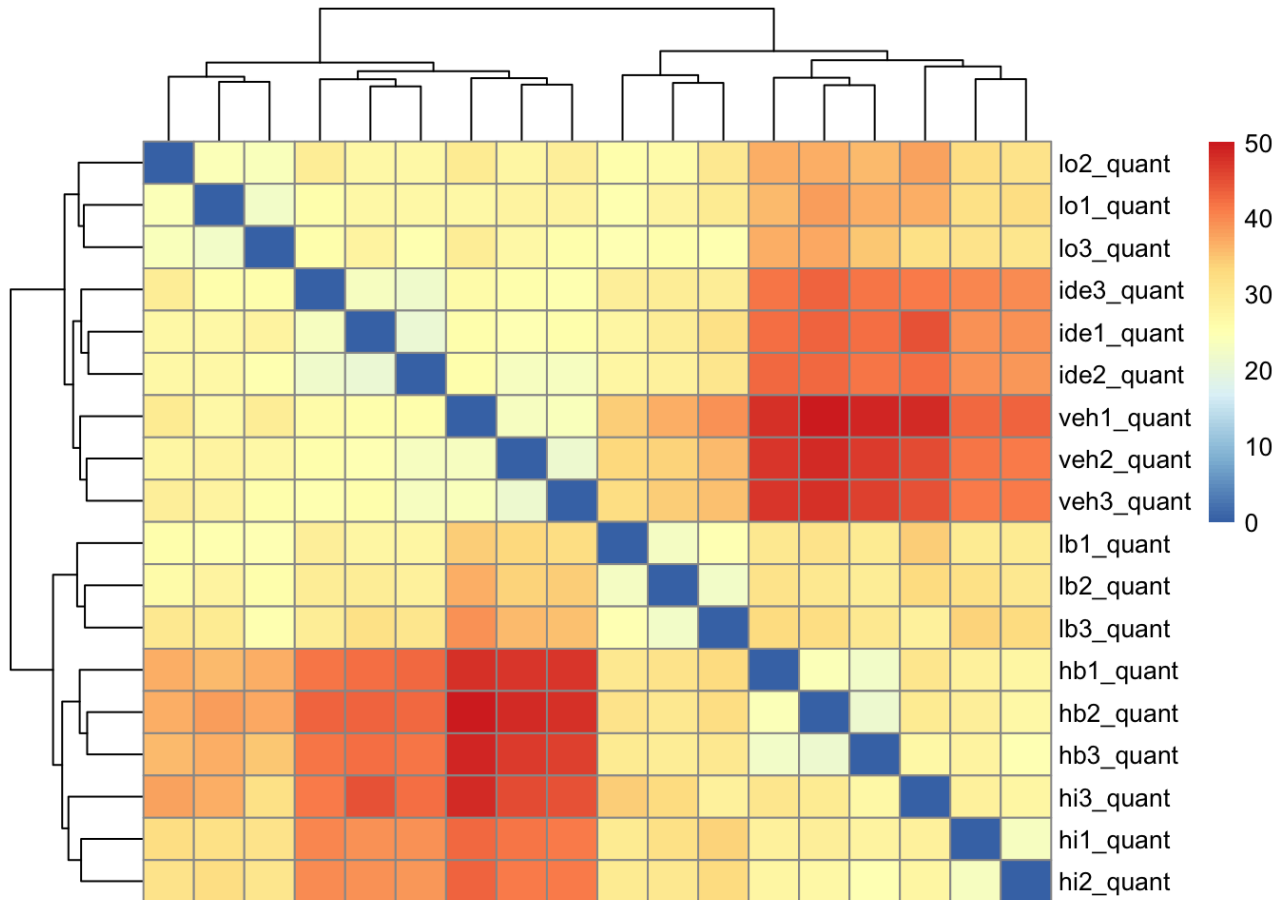

## Poisson-based heatmap

```

poisd <- PoissonDistance(t(counts(dds)))

samplePoisDistMatrix <- as.matrix( poisd$dd )
rownames(samplePoisDistMatrix) <- dds$names
colnames(samplePoisDistMatrix) <- NULL
pheatmap(samplePoisDistMatrix,
          clustering_distance_rows = poisd$ddd,
          clustering_distance_cols = poisd$ddd)

```

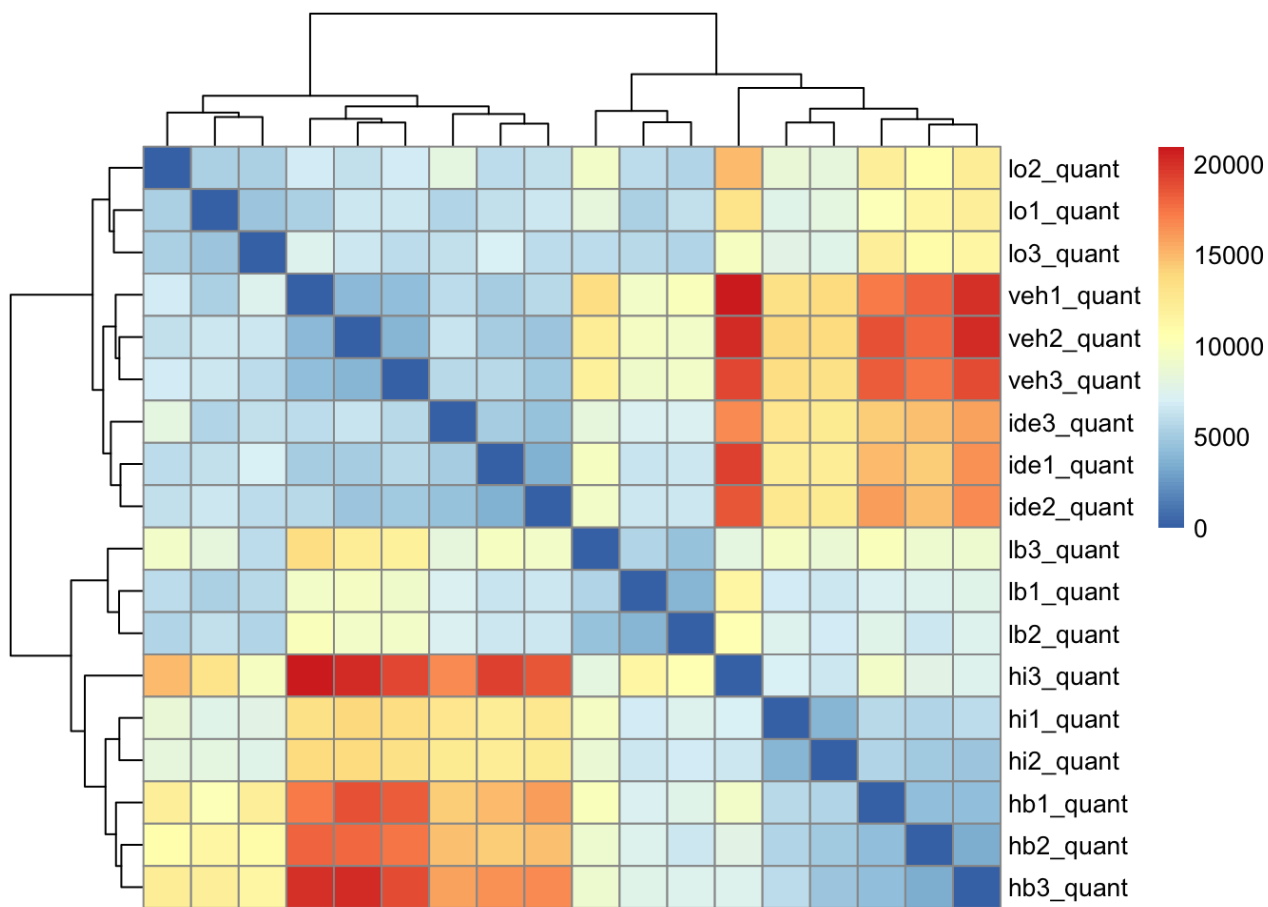

## PCA Plot

```
plotPCA(vsd, intgroup = c("dex", "idela")) +
  theme_bw() +
  theme(axis.title = element_text(face = "bold"))
```

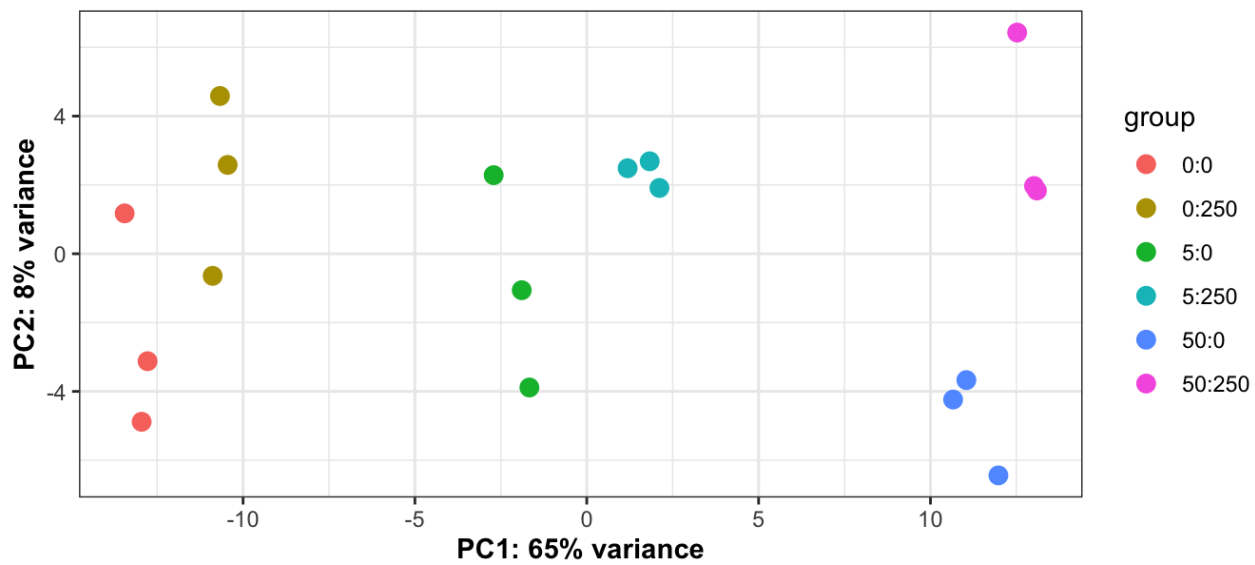

```
ggsave("nalm6_pca.pdf")
```

```
## Saving 7 x 5 in image
```

## MDS Plots

```
mds <- as.data.frame(colData(vsd)) %>%
  cbind(cmdscale(sampleDistMatrix))
ggplot(mds, aes(x = `1`, y = `2`, color = dex, shape = idela)) +
  geom_point(size = 3) +
  coord_fixed() +
  theme_bw()
```

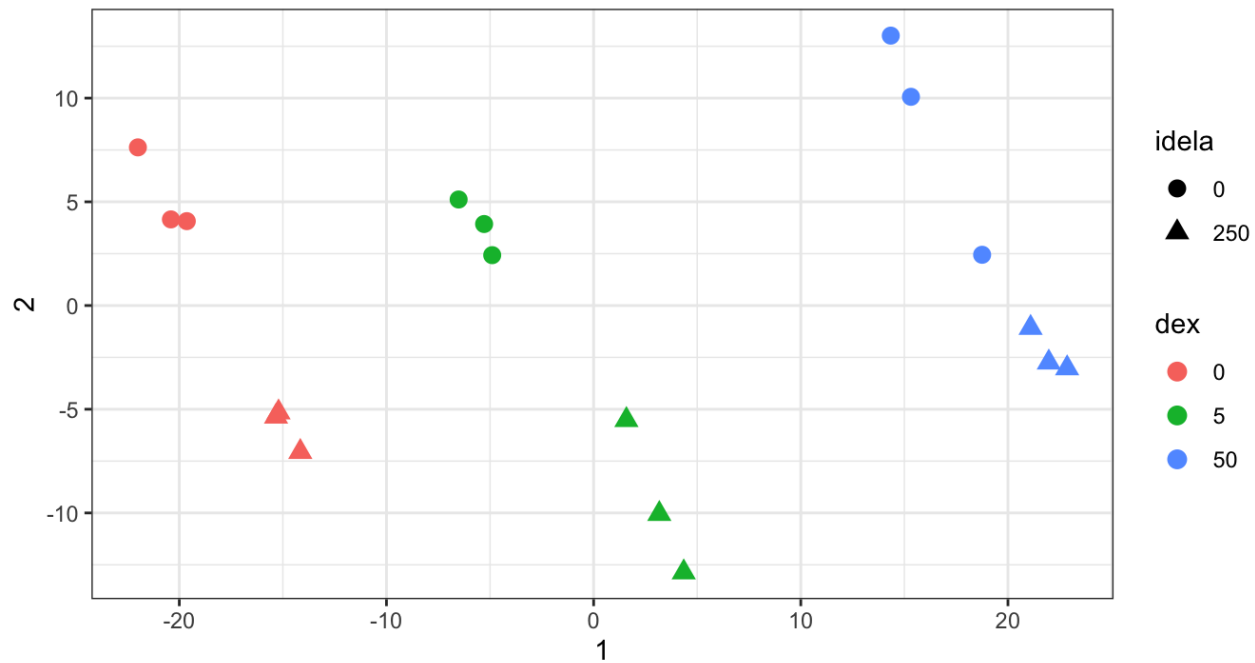

```
ggsave("mds_dex_idela.pdf", width = 4, height = 4)

mdsPois <- as.data.frame(colData(dds)) %>%
  cbind(cmdscale(samplePoisDistMatrix))
ggplot(mdsPois, aes(x = `1`, y = `2`, color = dex, shape = idela)) +
  geom_point(size = 3) +
  coord_fixed() +
  theme_bw()
```

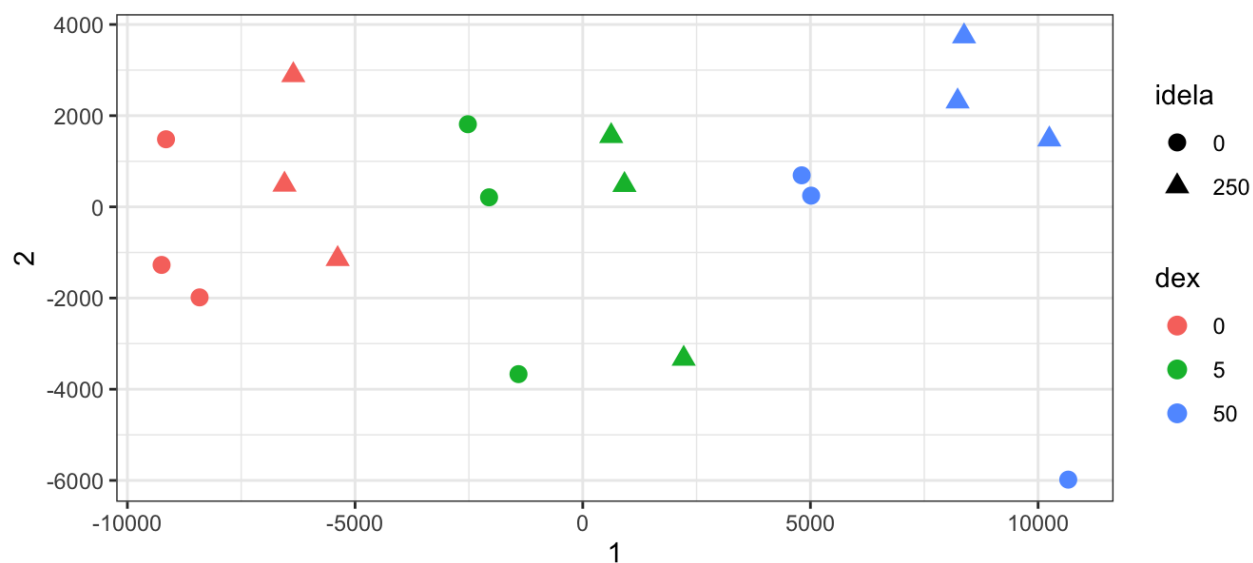

## Calculate differential expression

```
dds <- DESeq(dds)
```

```
## using pre-existing normalization factors
```

```
## estimating dispersions
```

```
## gene-wise dispersion estimates
```

```
## mean-dispersion relationship
```

```
## final dispersion estimates
```

```
## fitting model and testing
```

```
resultsNames(dds)
```

```
## [1] "Intercept"          "group_0250_vs_00"  "group_50_vs_00"
## [4] "group_500_vs_00"    "group_50250_vs_00" "group_5250_vs_00"
```



```
results <- results(dds)
```

## Make results tables for treatments versus control

```
res.hidex <- results(dds, name = "group_500_vs_00")
head(res.hidex[ order(res.hidex$padj, decreasing = FALSE), ])
```

```
## log2 fold change (MLE): group 500 vs 00
## Wald test p-value: group 500 vs 00
## Dataframe with 6 rows and 6 columns
##
```

|                       | baseMean  | log2FoldChange | lfcSE     | stat      | pvalue       |
|-----------------------|-----------|----------------|-----------|-----------|--------------|
|                       | <numeric> | <numeric>      | <numeric> | <numeric> | <numeric>    |
| ## ENSG00000143119.14 | 5893.710  | 2.30880        | 0.0567756 | 40.6654   | 0.00000e+00  |
| ## ENSG00000096060.15 | 7856.732  | 1.97255        | 0.0550563 | 35.8279   | 4.06130e-281 |
| ## ENSG00000265972.6  | 4263.711  | 3.07612        | 0.0911625 | 33.7433   | 1.34239e-249 |
| ## ENSG00000248302.3  | 921.545   | 4.34853        | 0.1312012 | 33.1440   | 6.91000e-241 |
| ## ENSG00000159200.18 | 3711.420  | 2.39813        | 0.0734715 | 32.6403   | 1.09914e-233 |
| ## ENSG00000256235.3  | 1054.201  | 3.29998        | 0.1032100 | 31.9734   | 2.55308e-224 |

```
##
```

|                       | padj         |
|-----------------------|--------------|
|                       | <numeric>    |
| ## ENSG00000143119.14 | 0.00000e+00  |
| ## ENSG00000096060.15 | 4.22700e-277 |
| ## ENSG00000265972.6  | 9.31442e-246 |
| ## ENSG00000248302.3  | 3.59597e-237 |
| ## ENSG00000159200.18 | 4.57595e-230 |
| ## ENSG00000256235.3  | 8.85748e-221 |

```
sum(res.hidex$padj < 0.01, na.rm=TRUE)
```

```
## [1] 3778
```

```
summary(res.hidex, alpha = 0.01)
```

```
##
## out of 21242 with nonzero total read count
## adjusted p-value < 0.01
## LFC > 0 (up)      : 1696, 8%
## LFC < 0 (down)    : 2082, 9.8%
## outliers [1]      : 14, 0.066%
## low counts [2]     : 412, 1.9%
## (mean count < 2)
## [1] see 'cooksCutoff' argument of ?results
## [2] see 'independentFiltering' argument of ?results
```

```
res.lodex <- results(dds, name = "group_50_vs_00")
head(res.lodex[ order(res.lodex$padj, decreasing = FALSE), ])
```

```
## log2 fold change (MLE): group 50 vs 00
## Wald test p-value: group 50 vs 00
## DataFrame with 6 rows and 6 columns
##           baseMean log2FoldChange      lfcSE      stat      pvalue
##           <numeric>      <numeric> <numeric> <numeric>      <numeric>
## ENSG00000256235.3   1054.201      2.56699 0.1042310   24.6279 6.34421e-134
## ENSG00000159200.18  3711.420      1.71182 0.0739485   23.1488 1.49357e-118
## ENSG00000248302.3    921.545      3.08684 0.1333862   23.1421 1.74456e-118
## ENSG00000109501.15   804.747      3.61453 0.1660013   21.7741 4.08126e-105
## ENSG00000174944.9   3855.746      5.78615 0.2802596   20.6457 1.06759e-94
## ENSG00000143119.14  5893.710      1.14805 0.0573598   20.0149 4.08097e-89
##           padj
##           <numeric>
## ENSG00000256235.3  9.29236e-130
## ENSG00000159200.18 8.51751e-115
## ENSG00000248302.3  8.51751e-115
## ENSG00000109501.15 1.49446e-101
## ENSG00000174944.9   3.12741e-91
## ENSG00000143119.14 9.96233e-86
```

```
sum(res.lodex$padj < 0.01, na.rm=TRUE)
```

```
## [1] 649
```

```
summary(res.lodex, alpha = 0.01)
```

```
##
## out of 21242 with nonzero total read count
## adjusted p-value < 0.01
## LFC > 0 (up)      : 407, 1.9%
## LFC < 0 (down)    : 242, 1.1%
## outliers [1]      : 14, 0.066%
## low counts [2]     : 6581, 31%
## (mean count < 14)
## [1] see 'cooksCutoff' argument of ?results
## [2] see 'independentFiltering' argument of ?results
```

```
res.idel <- results(dds, name = "group_0250_vs_00")
head(res.idel[ order(res.idel$padj, decreasing = FALSE), ])
```

```
## log2 fold change (MLE): group 0250 vs 00
## Wald test p-value: group 0250 vs 00
## DataFrame with 6 rows and 6 columns
##
```

|                       | baseMean  | log2FoldChange | lfcSE     | stat      | pvalue       |
|-----------------------|-----------|----------------|-----------|-----------|--------------|
| ##                    | <numeric> | <numeric>      | <numeric> | <numeric> | <numeric>    |
| ## ENSG00000134853.12 | 21714.814 | 1.334182       | 0.0578140 | 23.0771   | 7.85603e-118 |
| ## ENSG00000165507.9  | 621.084   | 1.959074       | 0.1356858 | 14.4383   | 2.97023e-47  |
| ## ENSG00000170365.10 | 8105.290  | 0.615688       | 0.0472780 | 13.0227   | 9.08835e-39  |
| ## ENSG00000086730.17 | 839.007   | -1.132965      | 0.0956698 | -11.8425  | 2.35467e-32  |
| ## ENSG00000087495.17 | 965.110   | 1.176041       | 0.0999210 | 11.7697   | 5.59153e-32  |
| ## ENSG00000107537.14 | 1409.967  | 1.199796       | 0.1132524 | 10.5940   | 3.17724e-26  |

```
##
```

|                       | padj         |
|-----------------------|--------------|
| ##                    | <numeric>    |
| ## ENSG00000134853.12 | 1.15067e-113 |
| ## ENSG00000165507.9  | 2.17525e-43  |
| ## ENSG00000170365.10 | 4.43723e-35  |
| ## ENSG00000086730.17 | 8.62223e-29  |
| ## ENSG00000087495.17 | 1.63798e-28  |
| ## ENSG00000107537.14 | 7.75617e-23  |

```
sum(res.idel$padj < 0.01, na.rm=TRUE)
```

```
## [1] 418
```

```
summary(res.idel, alpha = 0.01)
```

```
##
## out of 21242 with nonzero total read count
## adjusted p-value < 0.01
## LFC > 0 (up)      : 208, 0.98%
## LFC < 0 (down)    : 210, 0.99%
## outliers [1]      : 14, 0.066%
## low counts [2]    : 6581, 31%
## (mean count < 14)
## [1] see 'cooksCutoff' argument of ?results
## [2] see 'independentFiltering' argument of ?results
```

```
res.lob <- results(dds, name = "group_5250_vs_00")
head(res.lob[ order(res.lob$padj, decreasing = FALSE), ])
```

```
## log2 fold change (MLE): group 5250 vs 00
## Wald test p-value: group 5250 vs 00
## DataFrame with 6 rows and 6 columns
##
```

|                       | baseMean  | log2FoldChange | lfcSE     | stat      | pvalue       |
|-----------------------|-----------|----------------|-----------|-----------|--------------|
| ##                    | <numeric> | <numeric>      | <numeric> | <numeric> | <numeric>    |
| ## ENSG00000159200.18 | 3711.420  | 2.31732        | 0.0733828 | 31.5785   | 7.27599e-219 |
| ## ENSG00000256235.3  | 1054.201  | 2.95346        | 0.1033185 | 28.5860   | 1.00331e-179 |
| ## ENSG00000134853.12 | 21714.814 | 1.59611        | 0.0577802 | 27.6239   | 5.74750e-168 |
| ## ENSG00000248302.3  | 921.545   | 3.62203        | 0.1320445 | 27.4304   | 1.19207e-165 |
| ## ENSG00000170365.10 | 8105.290  | 1.16277        | 0.0469627 | 24.7595   | 2.44999e-135 |
| ## ENSG00000174944.9  | 3855.746  | 6.46468        | 0.2801177 | 23.0784   | 7.62301e-118 |

```
##
```

|                       | padj         |
|-----------------------|--------------|
| ##                    | <numeric>    |
| ## ENSG00000159200.18 | 1.21531e-214 |
| ## ENSG00000256235.3  | 8.37914e-176 |
| ## ENSG00000134853.12 | 3.20002e-164 |
| ## ENSG00000248302.3  | 4.97777e-162 |
| ## ENSG00000170365.10 | 8.18444e-132 |
| ## ENSG00000174944.9  | 2.12212e-114 |

```
sum(res.lob$padj < 0.01, na.rm=TRUE)
```

```
## [1] 2398
```

```
summary(res.lob, alpha = 0.01)
```

```
##
## out of 21242 with nonzero total read count
## adjusted p-value < 0.01
## LFC > 0 (up)      : 1053, 5%
## LFC < 0 (down)    : 1345, 6.3%
## outliers [1]      : 14, 0.066%
## low counts [2]     : 4525, 21%
## (mean count < 7)
## [1] see 'cooksCutoff' argument of ?results
## [2] see 'independentFiltering' argument of ?results
```

```
res.hib <- results(dds, name = "group_50250_vs_00")
head(res.hib[ order(res.hib$padj, decreasing = FALSE), ])
```

```
## log2 fold change (MLE): group 50250 vs 00
## Wald test p-value: group 50250 vs 00
## DataFrame with 6 rows and 6 columns
##
```

|                       | baseMean  | log2FoldChange | lfcSE     | stat      | pvalue       |
|-----------------------|-----------|----------------|-----------|-----------|--------------|
| ##                    | <numeric> | <numeric>      | <numeric> | <numeric> | <numeric>    |
| ## ENSG00000143119.14 | 5893.710  | 2.30042        | 0.0567700 | 40.5218   | 0.00000e+00  |
| ## ENSG00000159200.18 | 3711.420  | 2.98128        | 0.0731251 | 40.7696   | 0.00000e+00  |
| ## ENSG00000248302.3  | 921.545   | 4.90967        | 0.1306716 | 37.5726   | 0.00000e+00  |
| ## ENSG00000265972.6  | 4263.711  | 3.09309        | 0.0911349 | 33.9397   | 1.73045e-252 |
| ## ENSG00000101445.10 | 3816.773  | 2.58802        | 0.0783920 | 33.0138   | 5.15278e-239 |
| ## ENSG00000256235.3  | 1054.201  | 3.33627        | 0.1031139 | 32.3552   | 1.17282e-229 |

```
##
```

|                       | padj         |
|-----------------------|--------------|
| ##                    | <numeric>    |
| ## ENSG00000143119.14 | 0.00000e+00  |
| ## ENSG00000159200.18 | 0.00000e+00  |
| ## ENSG00000248302.3  | 0.00000e+00  |
| ## ENSG00000265972.6  | 8.82705e-249 |
| ## ENSG00000101445.10 | 2.10275e-235 |
| ## ENSG00000256235.3  | 3.98836e-226 |

```
sum(res.hib$padj < 0.01, na.rm=TRUE)
```

```
## [1] 4965
```

```
summary(res.hib, alpha = 0.01)
```

```
##
## out of 21242 with nonzero total read count
## adjusted p-value < 0.01
## LFC > 0 (up)      : 2164, 10%
## LFC < 0 (down)    : 2801, 13%
## outliers [1]      : 14, 0.066%
## low counts [2]    : 824, 3.9%
## (mean count < 3)
## [1] see 'cooksCutoff' argument of ?results
## [2] see 'independentFiltering' argument of ?results
```

## Annotate results tables

```
results_table <- function(res_name, deseq_obj, new_name) {
  df <- results(deseq_obj, name = res_name)
  df <- as.data.frame(df)
  df <- df[,c(1:3, 5:6)]
  colnames(df) <- c("base_mean", paste0(new_name, "_log2FC"), paste0(new_name, "_lfcse"), paste0(new_name, "_pval"), paste0(new_name, "_adjp"))
  new_name <- df
  return(new_name)
}

lfc_table <- function(res_name, deseq_obj, new_name) {
  df <- lfcShrink(deseq_obj, coef = res_name)
  df <- as.data.frame(df)
  colnames(df) <- c("base_mean", paste0(new_name, "_log2FC"), paste0(new_name, "_lfcse"), paste0(new_name, "_pval"), paste0(new_name, "_adjp"))
  new_name <- df
  return(new_name)
}

idel <- results_table("group_0250_vs_00", dds, "idel")
lodex <- results_table("group_50_vs_00", dds, "lodex")
hidex <- results_table("group_500_vs_00", dds, "hidex")
loboth <- results_table("group_5250_vs_00", dds, "loboth")
hiboth <- results_table("group_50250_vs_00", dds, "hiboth")

#idel <- lfc_table("group_0250_vs_00", dds, "idel")
#lodex <- lfc_table("group_50_vs_00", dds, "lodex")
#hidex <- lfc_table("group_500_vs_00", dds, "hidex")
#loboth <- lfc_table("group_5250_vs_00", dds, "loboth")
#hiboth <- lfc_table("group_50250_vs_00", dds, "hiboth")

sum_table <-
  cbind(idel, lodex[, c(2:5)]) %>%
  cbind(., hidex[, c(2:5)]) %>%
  cbind(., loboth[, c(2:5)]) %>%
  cbind(., hiboth[, c(2:5)])

add_geneids <- function(genelist) {
  genelist$symbol <- mapIds(org.Hs.eg.db, keys=str_sub(row.names(genelist), 1, 15), column="SYMBOL", keytype="ENSEMBL", multiVals="first")
  genelist$entrez <- mapIds(org.Hs.eg.db, keys=str_sub(row.names(genelist), 1, 15), column="ENTREZID", keytype="ENSEMBL", multiVals="first")
  genelist$genename <- mapIds(org.Hs.eg.db, str_sub(row.names(genelist), 1, 15), column="GENE NAME", keytype="ENSEMBL", multiVals="first")
  #genelist <- genelist %>% drop_na(log2FoldChange)
  return(genelist)
}

sum_table <- add_geneids(sum_table)
```

```
## 'select()' returned 1:many mapping between keys and columns
## 'select()' returned 1:many mapping between keys and columns
## 'select()' returned 1:many mapping between keys and columns
```

```
sum_tbl_2 <- sum_table %>%
  dplyr::select(0,(length(sum_table)-2):length(sum_table), everything()) %>%
  rownames_to_column(var = "ensembl") %>%
  arrange(symbol, ensembl) %>%
  filter(!duplicated(symbol)) %>%
  as_tibble()

write_csv(sum_tbl_2, "idela_genex_220609.csv")

sum_tbl_2
```

```
## # A tibble: 15,705 × 25
##   ensembl      symbol entrez genen...1 base_...2 idel_l...3 idel_...4 idel_...5 idel_...6
##   <chr>        <chr> <chr> <chr>      <dbl>      <dbl>      <dbl>      <dbl>      <dbl>
## 1 ENSG000001214... A1BG    1      alpha-... 270.    -0.165    0.310    0.596    0.883
## 2 ENSG000002688... A1BG-... 503538 A1BG a... 146.     0.255    0.195    0.191    0.620
## 3 ENSG000001758... A2M     2      alpha-... 37.9   -1.35     0.597    0.0238   0.218
## 4 ENSG000002451... A2M-A... 144571 A2M an...  5.48  -0.174    0.722    0.809    NA
## 5 ENSG000000949... AAAS    8086   aladin... 584.   -0.0217   0.0893   0.808    0.954
## 6 ENSG000000817... AACS    65985 acetoa... 328.    0.100    0.141    0.479    0.836
## 7 ENSG000001035... AAGAB   79719   alpha ... 1325.  -0.0426   0.131    0.745    0.934
## 8 ENSG000001159... AAK1    22848   AP2 as... 1801.  -0.104    0.122    0.397    0.787
## 9 ENSG000000878... AAMDC   28971   adipog... 109.   -0.00438  0.199    0.982    0.995
## 10 ENSG000001278... AAMP    14      angio ... 811.   -0.0667   0.113    0.554    0.867
## # ... with 15,695 more rows, 16 more variables: lodex_log2FC <dbl>,
## #   lodex_lfcse <dbl>, lodex_pval <dbl>, lodex_adjp <dbl>, hidex_log2FC <dbl>,
## #   hidex_lfcse <dbl>, hidex_pval <dbl>, hidex_adjp <dbl>, loboth_log2FC <dbl>,
## #   loboth_lfcse <dbl>, loboth_pval <dbl>, loboth_adjp <dbl>,
## #   hiboth_log2FC <dbl>, hiboth_lfcse <dbl>, hiboth_pval <dbl>,
## #   hiboth_adjp <dbl>, and abbreviated variable names 1genename, 2base_mean,
## #   3idel_log2FC, 4idel_lfcse, 5idel_pval, 6idel_adjp
```

## Make a longer summary table

```
sum_lng <- sum_tbl_2 %>%
  pivot_longer(cols = !c(1:5), names_to = c("treat", "stat"), names_sep = "_", values_to = "value") %>%
  pivot_wider(names_from = "stat", values_from = "value") %>%
  replace_na(list(pval = 1, adjp = 1)) %>%
  mutate(treat = factor(treat, c("idel", "lodex", "loboth", "hidex", "hiboth")))

sum_lng
```

```
## # A tibble: 78,525 × 10
##   ensembl      symbol entrez genen...1 base_...2 treat  log2FC lfcse  pval  adjp
##   <chr>      <chr>  <chr>  <chr>      <dbl> <fct>    <dbl> <dbl>  <dbl> <dbl>
## 1 ENSG00000121... A1BG    1      alpha-...  270. idel -0.165  0.310 0.596 0.883
## 2 ENSG00000121... A1BG    1      alpha-...  270. lodex 0.223  0.310 0.472 0.799
## 3 ENSG00000121... A1BG    1      alpha-...  270. hidex 0.0919 0.310 0.767 0.888
## 4 ENSG00000121... A1BG    1      alpha-...  270. lobo... 0.0653 0.309 0.833 0.921
## 5 ENSG00000121... A1BG    1      alpha-...  270. hibo... 0.685  0.309 0.0265 0.0764
## 6 ENSG00000268... A1BG-... 503538 A1BG a... 146. idel  0.255  0.195 0.191 0.620
## 7 ENSG00000268... A1BG-... 503538 A1BG a... 146. lodex 0.121  0.194 0.535 0.833
## 8 ENSG00000268... A1BG-... 503538 A1BG a... 146. hidex 0.478  0.193 0.0132 0.0532
## 9 ENSG00000268... A1BG-... 503538 A1BG a... 146. lobo... 0.397  0.192 0.0387 0.131
## 10 ENSG00000268... A1BG-... 503538 A1BG a... 146. hibo... 0.392  0.194 0.0437 0.115
## # ... with 78,515 more rows, and abbreviated variable names 1genename, 2base_mean
```

```
sum_rnaseq_tbl <- sum_lng %>%
  group_by(treat) %>%
  summarise(Up = sum(adjp <= 0.01 & log2FC > 0), Down = sum(adjp <= 0.01 & log2FC < 0)) %>%
  mutate(Total = Up + Down)

sum_lng %>%
  group_by(treat) %>%
  summarise(Up = sum(adjp <= 0.01 & log2FC > 0), Down = sum(adjp <= 0.01 & log2FC < 0)) %>%
  pivot_longer(cols = c("Up", "Down"), names_to = "Regulation", values_to = "Number") %>%
  ggplot(aes(treat, Number, fill = Regulation)) +
  geom_col(width = 0.8, position=position_dodge(0.9)) +
  scale_fill_manual(values=c('blue','red')) +
  scale_x_discrete(breaks=c("idel", "lodex", "loboth", "hidex", "hiboth"), labels=c("Idela",
"5nM Dex", "5 nM Dex +\nIdela", "50 nM Dex", "50 nM Dex +\nIdela")) +
  theme_bw() +
  ylab("Number of Genes Regulated") +
  theme(axis.text.x = element_text(angle = 45, hjust = 1), axis.title.x=element_blank(), axis.title.y = element_text(face = "bold"), legend.position = c(0.2, 0.8))
```



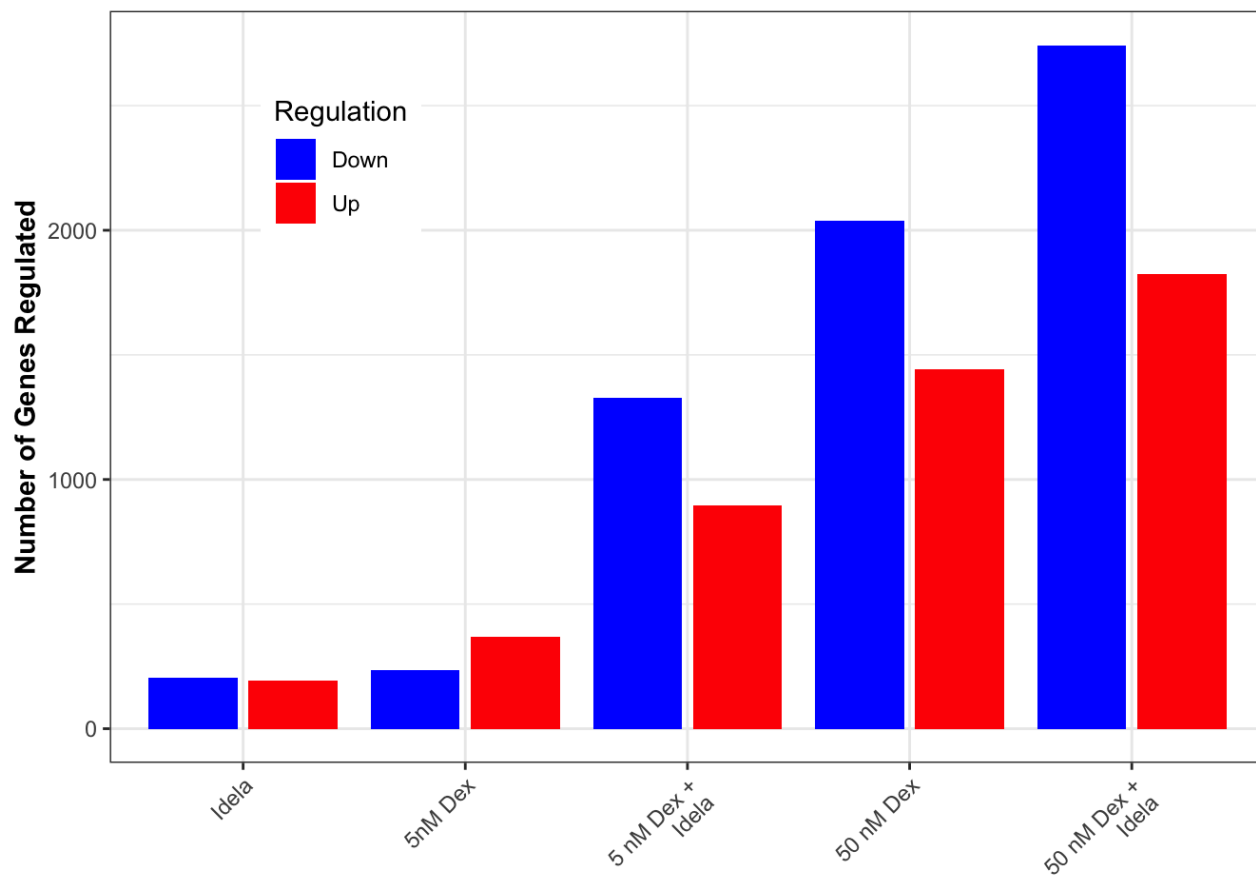

```
ggsave("nalm_idela_up_down_summary.pdf", width = 4, height = 4)
```

## Description of dex+idela vs dex alone

```
lo_and_both_reg <- dplyr::filter(sum_tbl_2, lodex_adjp <= 0.01 | loboth_adjp <= 0.01 | idel_a  
djp <= 0.01)  
cc = character(nrow(lo_and_both_reg)) ## will hold the color designations  
cc[lo_and_both_reg$loboth_adjp <= 0.01] = "white"  
cc[lo_and_both_reg$idel_adjp <= 0.01 & lo_and_both_reg$lodex_adjp <= 0.01 & lo_and_both_reg$l  
oboth_adjp <= 0.01] = "black"  
cc[lo_and_both_reg$idel_adjp <= 0.01 & !lo_and_both_reg$loboth_adjp <= 0.01 & !lo_and_both_re  
g$lodex_adjp <= 0.01 ] = "red"  
cc[lo_and_both_reg$lodex_adjp <= 0.01 & !lo_and_both_reg$idel_adjp <= 0.01 & !lo_and_both_reg  
$loboth_adjp <= 0.01 ] = "green"  
cc[lo_and_both_reg$idel_adjp <= 0.01 & lo_and_both_reg$lodex_adjp <= 0.01 & !lo_and_both_reg  
$loboth_adjp <= 0.01] = "yellow"  
lo_and_both_reg <- cbind(lo_and_both_reg,cc)  
  
lm_lo_and_both <- lm(lo_and_both_reg$lodex_log2FC ~ lo_and_both_reg$loboth_log2FC)  
hi_and_both_reg <- dplyr::filter(sum_table, hidex_adjp <= 0.01 | hiboth_adjp <= 0.01)  
lm_hi_and_both <- lm(hi_and_both_reg$hidex_log2FC ~ hi_and_both_reg$hiboth_log2FC)  
  
par(mfrow = c(c(1,2)))  
plot(lo_and_both_reg$lodex_log2FC, lo_and_both_reg$loboth_log2FC,  
      col = ifelse(lo_and_both_reg$lodex_adjp <= 0.01, "red", "black"), xlim = c(-10,10), ylim  
= c(-10,10), pch = 20,  
      xlab = "log2 Fold Change (5nM Dex)", ylab = "log2 Fold Change (5nM Dex + 250nM Idela)",  
main = "5 nM Dex + Idelalisib")  
abline(0,1)  
plot(hi_and_both_reg$hidex_log2FC, hi_and_both_reg$hiboth_log2FC,  
      col = ifelse(hi_and_both_reg$hidex_adjp <= 0.01, "red", "black"), xlim = c(-10,10), ylim  
= c(-10,10), pch = 20,  
      xlab = "log2 Fold Change (50nM Dex)", ylab = "log2 Fold Change (50nM Dex + 250nM Idel  
a)", main = "50 nM Dex + Idelalisib")  
abline(0,1)
```

**5 nM Dex + Idelalisib**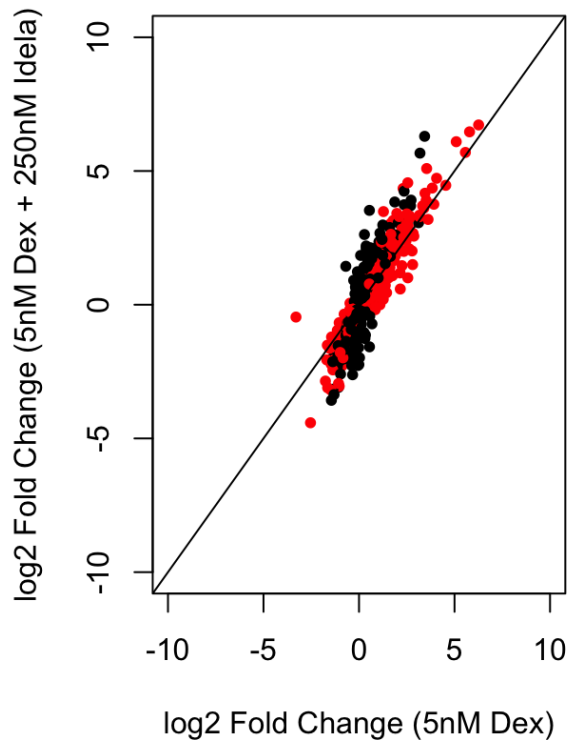**50 nM Dex + Idelalisib**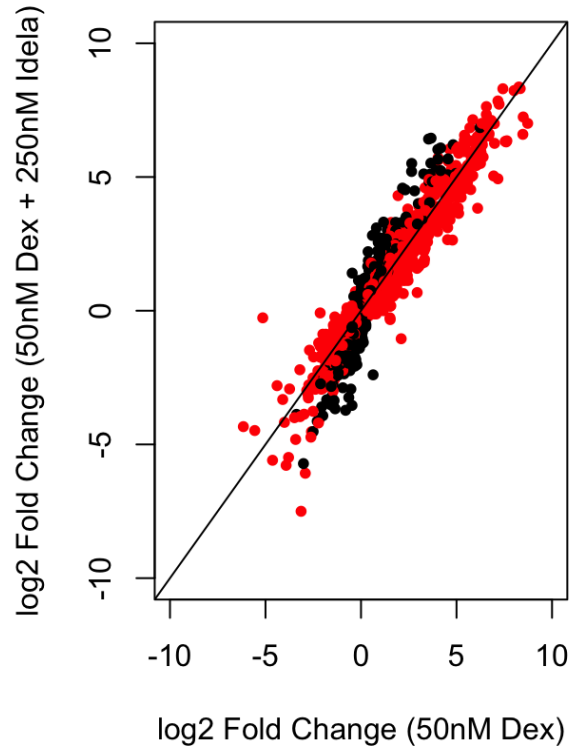

```

lodex_reg_filt <- dplyr::filter(sum_table, lodex_adj_p <= 0.01)
p1 <- ggscatter(lodex_reg_filt, x = "lodex_log2FC", y = "loboth_log2FC",
  add = "reg.line", conf.int = TRUE,
  cor.coef = TRUE, cor.method = "pearson",
  xlab = "log2FC, 5nM Dex", ylab = "log2FC, Dex + Idela") +
  xlim(-6,8) + ylim(-6,8) +
  stat_cor(label.x.npc = "left", label.y.npc = "top") +
  stat_regline_equation(label.y = 8, aes(label = after_stat(eq.label))) +
  geom_abline(intercept = 0, slope = 1, colour = "red") +
  theme_bw()

hidex_reg_filt <- dplyr::filter(sum_tbl_2, hidex_adj_p <= 0.01 & abs(hiboth_log2FC) < 15 & abs(
  (hidex_log2FC) < 15)
#hidex_reg_filt <- dplyr::filter(sum_table, hidex_adj_p <= 0.01)

p2 <- ggscatter(hidex_reg_filt, x = "hidex_log2FC", y = "hiboth_log2FC",
  add = "reg.line", conf.int = TRUE,
  cor.coef = TRUE, cor.method = "pearson",
  xlab = "log2FC, 50nM Dex", ylab = "log2FC, Dex + Idela") +
  xlim(-6,8) + ylim(-6,8) +
  stat_cor(label.x.npc = "left", label.y.npc = "top") +
  stat_regline_equation(label.y = 8, aes(label = after_stat(eq.label))) +
  geom_abline(intercept = 0, slope = 1, colour = "red") +
  theme_bw()

g <- grid.arrange(p1, p2, nrow = 1)

```

```
## `geom_smooth()` using formula = 'y ~ x'
```

```
## Warning: Removed 2 rows containing non-finite values (`stat_smooth()`).
```

```
## Warning: Removed 2 rows containing non-finite values (`stat_cor()`).  
## Removed 2 rows containing non-finite values (`stat_cor()`).
```

```
## Warning: Removed 2 rows containing non-finite values  
## (`stat_regline_equation()`).
```

```
## Warning: Removed 2 rows containing missing values (`geom_point()`).
```

```
## Warning: Removed 1 rows containing missing values (`geom_smooth()`).
```

```
## `geom_smooth()` using formula = 'y ~ x'
```

```
## Warning: Removed 6 rows containing non-finite values (`stat_smooth()`).
```

```
## Warning: Removed 6 rows containing non-finite values (`stat_cor()`).  
## Removed 6 rows containing non-finite values (`stat_cor()`).
```

```
## Warning: Removed 6 rows containing non-finite values  
## (`stat_regline_equation()`).
```

```
## Warning: Removed 6 rows containing missing values (`geom_point()`).
```

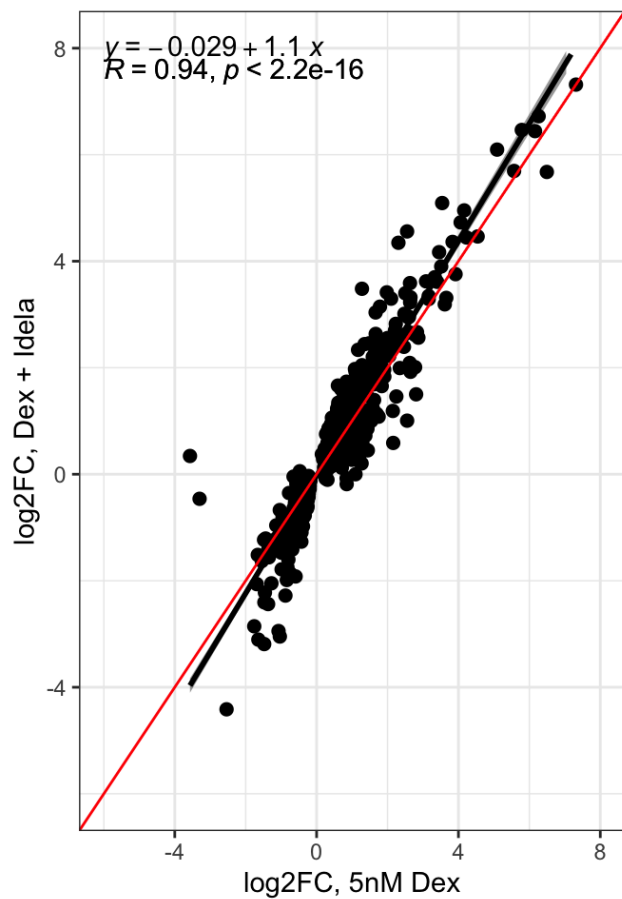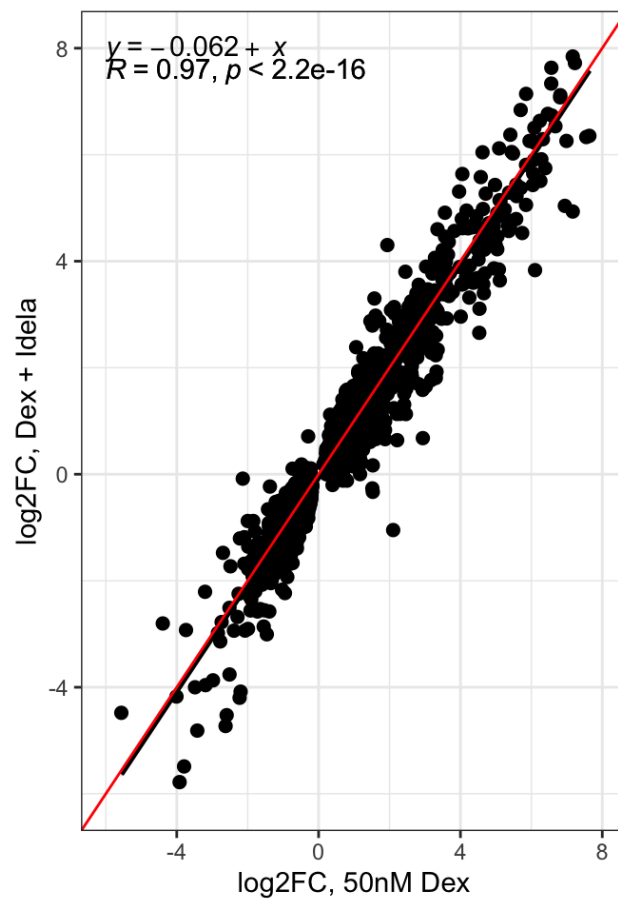

```
ggsave(filename = "nalm6_dex_idel_5_50_scatter.pdf", height = 4, width = 8, g)
```

**Do a correlation plot to determine the general behavior of dex + idela**

```
lodex_reg_filt <- dplyr::filter(sum_tbl_2, lodex_adj <= 0.01 & abs(lodex_log2FC) < 10)

# ttest for enhanced upregulation by idela
lodex_reg_filt %>%
  filter(loboth_log2FC > 0) %>%
  t.test(.$loboth_log2FC, .$lodex_log2FC, data=.)
```

```
##
## Welch Two Sample t-test
##
## data:  .$loboth_log2FC and .$lodex_log2FC
## t = 2.1342, df = 710.77, p-value = 0.03316
## alternative hypothesis: true difference in means is not equal to 0
## 95 percent confidence interval:
##  0.01263657 0.30292009
## sample estimates:
## mean of x mean of y
##  1.204455  1.046677
```

```

test_up <- lodex_reg_filt %>%
  filter(loboth_log2FC > 0)

b1 <- lodex_reg_filt %>%
  dplyr::select(lodex_log2FC, loboth_log2FC) %>%
  filter(loboth_log2FC > 0) %>%
  pivot_longer(cols = c("lodex_log2FC", "loboth_log2FC"), names_to = "treat", values_to = "log2FC") %>%
  mutate(treat = factor(treat, levels = c("lodex_log2FC", "loboth_log2FC"))) %>%
  ggplot(aes(treat, log2FC)) +
  ggtitle("Low dex, upregulated genes") + ylab("log2FC") + xlab("") +
  geom_boxplot() +
  theme(axis.text.x = element_text(angle = 45, hjust = 1)) +
  theme_bw()

b_up <- lodex_reg_filt%>%
  dplyr::select(lodex_log2FC, loboth_log2FC) %>%
  filter(loboth_log2FC > 0 | lodex_log2FC > 0) %>%
  pivot_longer(cols = c("lodex_log2FC", "loboth_log2FC"), names_to = "treat", values_to = "log2FC") %>%
  mutate(treat = factor(treat, levels = c("lodex_log2FC", "loboth_log2FC"))) %>%
  ggplot(aes(treat, log2FC)) +
  ylab("log2FC") + xlab("") +
  geom_boxplot() +
  ylim(-6,8) +
  theme_bw() +
  theme(axis.text.x = element_text(angle = 45, hjust = 1))

b_down <- lodex_reg_filt%>%
  dplyr::select(lodex_log2FC, loboth_log2FC) %>%
  filter(loboth_log2FC < 0 | lodex_log2FC < 0) %>%
  pivot_longer(cols = c("lodex_log2FC", "loboth_log2FC"), names_to = "treat", values_to = "log2FC") %>%
  mutate(treat = factor(treat, levels = c("lodex_log2FC", "loboth_log2FC"))) %>%
  ggplot(aes(treat, log2FC)) +
  ylab("log2FC") + xlab("") +
  geom_boxplot() +
  ylim(-6,8) +
  theme_bw() +
  theme(axis.text.x = element_text(angle = 45, hjust = 1))

box_lowboth <- grid.arrange(b_up, b_down, nrow = 1)

```

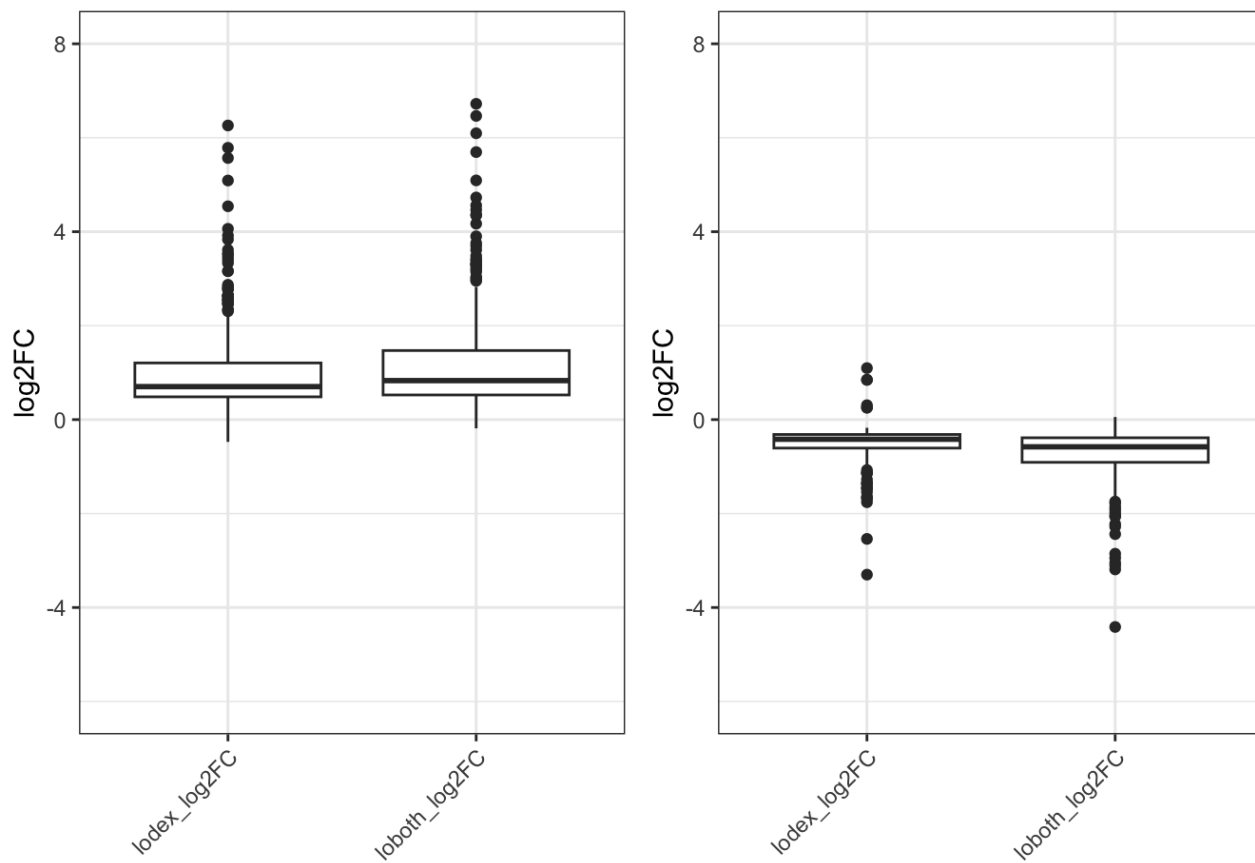

```
ggsave(filename = "boxplot_dex_idel_5.pdf", height = 4, width = 3, box_lowboth)
```

```
t.test(test_up$loboth_log2FC, test_up$lodex_log2FC, paired = TRUE)
```

```
##
## Paired t-test
##
## data: test_up$loboth_log2FC and test_up$lodex_log2FC
## t = 6.5445, df = 363, p-value = 2.036e-10
## alternative hypothesis: true mean difference is not equal to 0
## 95 percent confidence interval:
##  0.1103686 0.2051880
## sample estimates:
## mean difference
##      0.1577783
```

```
test_down <- lodex_reg_filt %>%
  filter(loboth_log2FC < 0)
```

```
t.test(test_down$loboth_log2FC, test_down$lodex_log2FC, paired = TRUE)
```

```
##
## Paired t-test
##
## data: test_down$loboth_log2FC and test_down$lodex_log2FC
## t = -8.6088, df = 239, p-value = 1.005e-15
## alternative hypothesis: true mean difference is not equal to 0
## 95 percent confidence interval:
## -0.2873247 -0.1803154
## sample estimates:
## mean difference
## -0.2338201
```

```
t.test(abs(lodex_reg_filt$loboth_log2FC), abs(lodex_reg_filt$lodex_log2FC), paired = TRUE)
```

```
##
## Paired t-test
##
## data: abs(lodex_reg_filt$loboth_log2FC) and abs(lodex_reg_filt$lodex_log2FC)
## t = 9.5454, df = 603, p-value < 2.2e-16
## alternative hypothesis: true mean difference is not equal to 0
## 95 percent confidence interval:
## 0.1385816 0.2103782
## sample estimates:
## mean difference
## 0.1744799
```

```
mean(abs(lodex_reg_filt$loboth_log2FC)) - mean(abs(lodex_reg_filt$lodex_log2FC))
```

```
## [1] 0.1744799
```

```
t.test(abs(hidex_reg_filt$hiboth_log2FC), abs(hidex_reg_filt$hidex_log2FC), paired = TRUE)
```

```
##
## Paired t-test
##
## data: abs(hidex_reg_filt$hiboth_log2FC) and abs(hidex_reg_filt$hidex_log2FC)
## t = 9.6827, df = 3480, p-value < 2.2e-16
## alternative hypothesis: true mean difference is not equal to 0
## 95 percent confidence interval:
## 0.04579721 0.06905314
## sample estimates:
## mean difference
## 0.05742518
```

```
mean(abs(hidex_reg_filt$hiboth_log2FC)) - mean(abs(hidex_reg_filt$hidex_log2FC))
```

```
## [1] 0.05742518
```



```

lodex_up_lng <- lodex_reg_filt %>%
  dplyr::select(lodex_log2FC, loboth_log2FC) %>%
  filter(loboth_log2FC > 0) %>%
  pivot_longer(cols = c("lodex_log2FC", "loboth_log2FC"), names_to = "treat", values_to = "log2FC")

ggplot(lodex_up_lng, aes(treat, log2FC)) +
  geom_boxplot()

```

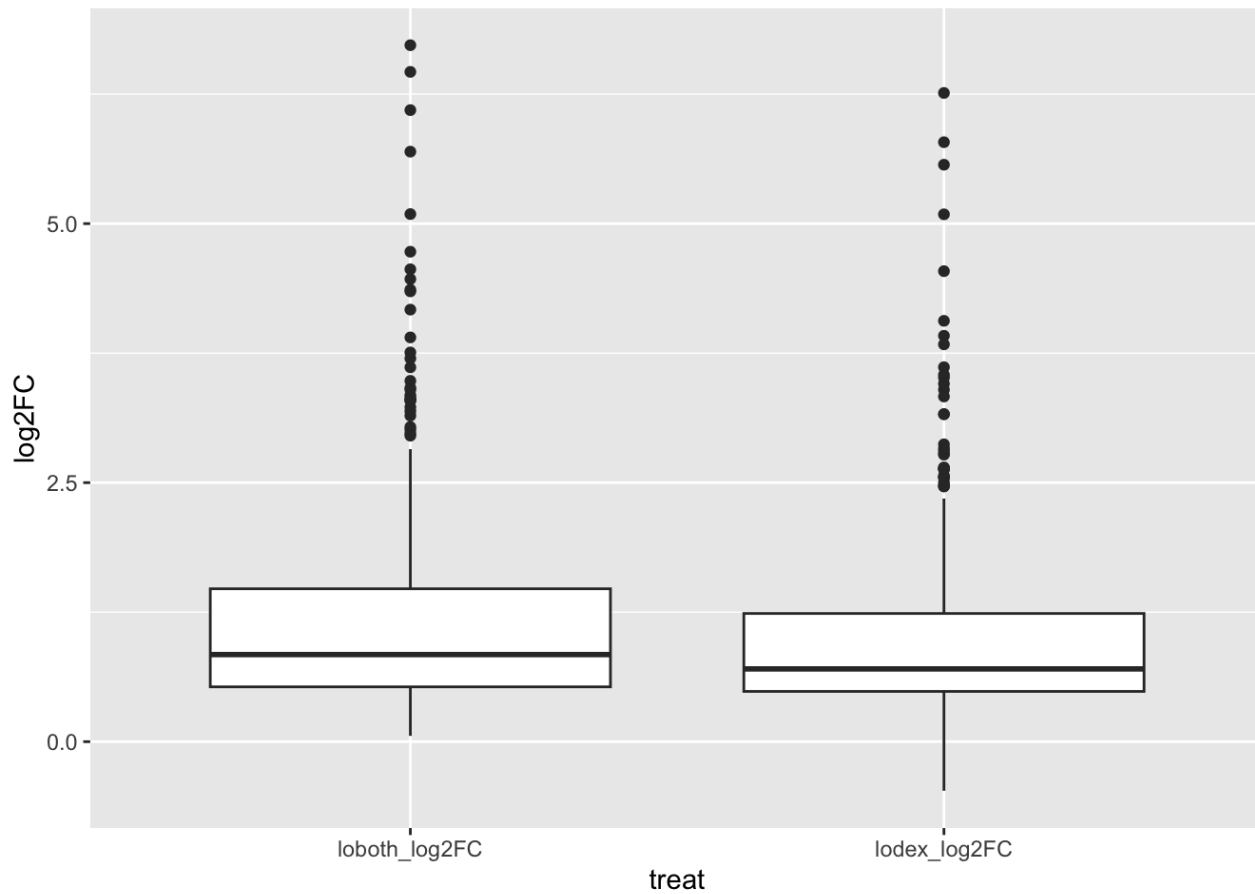

## Other comparisons

```

res.lob_lo <- results(dds, contrast = c("group", "5250", "50"))
head(res.lob_lo[ order(res.lob_lo$padj, decreasing = FALSE), ])

```

```
## log2 fold change (MLE): group 5250 vs 50
## Wald test p-value: group 5250 vs 50
## DataFrame with 6 rows and 6 columns
##           baseMean log2FoldChange      lfcSE      stat      pvalue
##           <numeric>      <numeric> <numeric> <numeric>      <numeric>
## ENSG00000134853.12 21714.814      0.903692 0.0575220 15.71037 1.28426e-55
## ENSG00000086730.17  839.007     -1.127217 0.0992807 -11.35383 7.09809e-30
## ENSG00000111371.16 14645.798      0.456088 0.0406732 11.21347 3.50181e-29
## ENSG00000127325.19  161.349      2.203259 0.1964678 11.21435 3.46725e-29
## ENSG00000145358.6   540.945     -1.327342 0.1330047 -9.97966 1.87102e-23
## ENSG00000168209.6  1767.982     -0.719078 0.0813786 -8.83620 9.90276e-19
##           padj
##           <numeric>
## ENSG00000134853.12 1.82827e-51
## ENSG00000086730.17 5.05242e-26
## ENSG00000111371.16 1.24629e-25
## ENSG00000127325.19 1.24629e-25
## ENSG00000145358.6  5.32716e-20
## ENSG00000168209.6  2.34960e-15
```

```
sum(res.lob_lo$padj < 0.01, na.rm=TRUE)
```

```
## [1] 572
```

```
summary(res.lob_lo, alpha = 0.01)
```

```
##
## out of 21242 with nonzero total read count
## adjusted p-value < 0.01
## LFC > 0 (up)      : 234, 1.1%
## LFC < 0 (down)    : 338, 1.6%
## outliers [1]      : 14, 0.066%
## low counts [2]     : 6992, 33%
## (mean count < 16)
## [1] see 'cooksCutoff' argument of ?results
## [2] see 'independentFiltering' argument of ?results
```

```
res.hib_hi <- results(dds, contrast = c("group", "50250", "500"))
head(res.hib_hi[ order(res.hib_hi$padj, decreasing = FALSE), ])
```

```
## log2 fold change (MLE): group 50250 vs 500
## Wald test p-value: group 50250 vs 500
## DataFrame with 6 rows and 6 columns
##           baseMean log2FoldChange      lfcSE      stat      pvalue
##           <numeric>      <numeric> <numeric> <numeric> <numeric>
## ENSG00000134853.12 21714.814      0.793701 0.0577642 13.74038 5.81696e-43
## ENSG00000127325.19  161.349      2.365213 0.1891950 12.50146 7.32923e-36
## ENSG00000211672.2  1717.413      1.005801 0.0874044 11.50745 1.21000e-30
## ENSG00000235621.10  232.026      1.371629 0.1301860 10.53592 5.90037e-26
## ENSG00000285578.1   449.134      1.251376 0.1263179   9.90656 3.89837e-23
## ENSG00000065911.13 5270.897     -0.511357 0.0559595  -9.13798 6.36303e-20
##           padj
##           <numeric>
## ENSG00000134853.12 7.56263e-39
## ENSG00000127325.19 4.76437e-32
## ENSG00000211672.2  5.24375e-27
## ENSG00000235621.10 1.91777e-22
## ENSG00000285578.1  1.01366e-19
## ENSG00000065911.13 1.37876e-16
```

```
sum(res.hib_hi$padj < 0.01, na.rm=TRUE)
```

```
## [1] 511
```

```
summary(res.hib_hi, alpha = 0.01)
```

```
##
## out of 21242 with nonzero total read count
## adjusted p-value < 0.01
## LFC > 0 (up)      : 201, 0.95%
## LFC < 0 (down)    : 310, 1.5%
## outliers [1]      : 14, 0.066%
## low counts [2]    : 8227, 39%
## (mean count < 26)
## [1] see 'cooksCutoff' argument of ?results
## [2] see 'independentFiltering' argument of ?results
```

```
res.dex_hilo <- results(dds, contrast = c("group", "500", "50"))
head(res.dex_hilo[ order(res.dex_hilo$padj, decreasing = FALSE), ])
```

```
## log2 fold change (MLE): group 500 vs 50
## Wald test p-value: group 500 vs 50
## DataFrame with 6 rows and 6 columns
##
```

|                       | baseMean  | log2FoldChange | lfcSE     | stat      | pvalue       |
|-----------------------|-----------|----------------|-----------|-----------|--------------|
| ##                    | <numeric> | <numeric>      | <numeric> | <numeric> | <numeric>    |
| ## ENSG00000265972.6  | 4263.711  | 2.100826       | 0.0891110 | 23.5754   | 6.89690e-123 |
| ## ENSG00000285417.1  | 472.855   | 2.678949       | 0.1241803 | 21.5731   | 3.21663e-103 |
| ## ENSG00000143119.14 | 5893.710  | 1.160749       | 0.0549125 | 21.1382   | 3.54572e-99  |
| ## ENSG00000096060.15 | 7856.732  | 0.958836       | 0.0539498 | 17.7728   | 1.14898e-70  |
| ## ENSG00000165810.17 | 568.781   | 2.128813       | 0.1223836 | 17.3946   | 9.06530e-68  |
| ## ENSG00000092820.19 | 4460.222  | 0.830240       | 0.0505469 | 16.4251   | 1.26416e-60  |

```
##
```

|                       | padj         |
|-----------------------|--------------|
| ##                    | <numeric>    |
| ## ENSG00000265972.6  | 1.12364e-118 |
| ## ENSG00000285417.1  | 2.62027e-99  |
| ## ENSG00000143119.14 | 1.92556e-95  |
| ## ENSG00000096060.15 | 4.67981e-67  |
| ## ENSG00000165810.17 | 2.95384e-64  |
| ## ENSG00000092820.19 | 3.43262e-57  |

```
sum(res.dex_hilo$padj < 0.01, na.rm=TRUE)
```

```
## [1] 1686
```

```
summary(res.dex_hilo, alpha = 0.01)
```

```
##
## out of 21242 with nonzero total read count
## adjusted p-value < 0.01
## LFC > 0 (up)      : 774, 3.6%
## LFC < 0 (down)    : 912, 4.3%
## outliers [1]      : 14, 0.066%
## low counts [2]     : 4936, 23%
## (mean count < 8)
## [1] see 'cooksCutoff' argument of ?results
## [2] see 'independentFiltering' argument of ?results
```

```
res.lob_idel <- results(dds, contrast = c("group", "5250", "0250"))
head(res.lob_idel[ order(res.lob_idel$padj, decreasing = FALSE), ])
```

```
## log2 fold change (MLE): group 5250 vs 0250
## Wald test p-value: group 5250 vs 0250
## DataFrame with 6 rows and 6 columns
##
```

|                       | baseMean  | log2FoldChange | lfcSE     | stat      | pvalue       |
|-----------------------|-----------|----------------|-----------|-----------|--------------|
| ##                    | <numeric> | <numeric>      | <numeric> | <numeric> | <numeric>    |
| ## ENSG00000256235.3  | 1054.201  | 2.65312        | 0.0966499 | 27.4509   | 6.78403e-166 |
| ## ENSG00000248302.3  | 921.545   | 2.91832        | 0.1120499 | 26.0448   | 1.54093e-149 |
| ## ENSG00000159200.18 | 3711.420  | 1.66459        | 0.0708415 | 23.4973   | 4.34136e-122 |
| ## ENSG00000143119.14 | 5893.710  | 1.32565        | 0.0571890 | 23.1801   | 7.22828e-119 |
| ## ENSG00000164938.14 | 2806.620  | 4.20289        | 0.1873109 | 22.4380   | 1.67497e-111 |
| ## ENSG00000174944.9  | 3855.746  | 5.96869        | 0.2686013 | 22.2214   | 2.13455e-109 |

```
##
```

|                       | padj         |
|-----------------------|--------------|
| ##                    | <numeric>    |
| ## ENSG00000256235.3  | 1.04956e-161 |
| ## ENSG00000248302.3  | 1.19199e-145 |
| ## ENSG00000159200.18 | 2.23884e-118 |
| ## ENSG00000143119.14 | 2.79572e-115 |
| ## ENSG00000164938.14 | 5.18269e-108 |
| ## ENSG00000174944.9  | 5.50395e-106 |

```
sum(res.lob_idel$padj < 0.01, na.rm=TRUE)
```

```
## [1] 921
```

```
summary(res.lob_idel, alpha = 0.01)
```

```
##
## out of 21242 with nonzero total read count
## adjusted p-value < 0.01
## LFC > 0 (up)      : 480, 2.3%
## LFC < 0 (down)    : 441, 2.1%
## outliers [1]      : 14, 0.066%
## low counts [2]    : 5757, 27%
## (mean count < 11)
## [1] see 'cooksCutoff' argument of ?results
## [2] see 'independentFiltering' argument of ?results
```

```
res.hib_idel <- results(dds, contrast = c("group", "50250", "0250"))
head(res.hib_idel[ order(res.hib_idel$padj, decreasing = FALSE), ])
```

```
## log2 fold change (MLE): group 50250 vs 0250
## Wald test p-value: group 50250 vs 0250
## DataFrame with 6 rows and 6 columns
##
```

|                       | baseMean  | log2FoldChange | lfcSE     | stat      | pvalue       |
|-----------------------|-----------|----------------|-----------|-----------|--------------|
| ##                    | <numeric> | <numeric>      | <numeric> | <numeric> | <numeric>    |
| ## ENSG00000143119.14 | 5893.710  | 2.44158        | 0.0566614 | 43.0906   | 0.00000e+00  |
| ## ENSG00000248302.3  | 921.545   | 4.20596        | 0.1104286 | 38.0876   | 0.00000e+00  |
| ## ENSG00000096060.15 | 7856.732  | 1.82493        | 0.0549998 | 33.1807   | 2.04391e-241 |
| ## ENSG00000159200.18 | 3711.420  | 2.32855        | 0.0705746 | 32.9942   | 9.83844e-239 |
| ## ENSG00000101445.10 | 3816.773  | 2.56407        | 0.0777833 | 32.9643   | 2.63702e-238 |
| ## ENSG00000265972.6  | 4263.711  | 2.95921        | 0.0902500 | 32.7890   | 8.44555e-236 |

```
##
```

|                       | padj         |
|-----------------------|--------------|
| ##                    | <numeric>    |
| ## ENSG00000143119.14 | 0.00000e+00  |
| ## ENSG00000248302.3  | 0.00000e+00  |
| ## ENSG00000096060.15 | 1.41820e-237 |
| ## ENSG00000159200.18 | 5.11992e-235 |
| ## ENSG00000101445.10 | 1.09784e-234 |
| ## ENSG00000265972.6  | 2.93004e-232 |

```
sum(res.hib_idel$padj < 0.01, na.rm=TRUE)
```

```
## [1] 4001
```

```
summary(res.hib_idel, alpha = 0.01)
```

```
##
## out of 21242 with nonzero total read count
## adjusted p-value < 0.01
## LFC > 0 (up)      : 1734, 8.2%
## LFC < 0 (down)    : 2267, 11%
## outliers [1]      : 14, 0.066%
## low counts [2]    : 412, 1.9%
## (mean count < 2)
## [1] see 'cooksCutoff' argument of ?results
## [2] see 'independentFiltering' argument of ?results
```

##Genes with an interaction between idela and dex

```
dds_int <- DESeqDataSet(gse, ~dex + idela + dex:idela)
```

```
## using counts and average transcript lengths from tximeta
```

```
#dds_int <- DESeqDataSetFromTximport(txi, cond, ~ idela + dex + idela:dex)
#Filter
dds_int <- dds_int[ rowSums(counts(dds_int)) > 36, ]
#Diff regulation
#Then actually look for differences between samples
dds_int <- DESeq(dds_int)
```

```
## estimating size factors
```

```
## using 'avgTxLength' from assays(dds), correcting for library size
```

```
## estimating dispersions
```

```
## gene-wise dispersion estimates
```

```
## mean-dispersion relationship
```

```
## final dispersion estimates
```

```
## fitting model and testing
```

```
resultsNames(dds_int)
```

```
## [1] "Intercept"      "dex_5_vs_0"      "dex_50_vs_0"      "idela_250_vs_0"  
## [5] "dex5.idela250"   "dex50.idela250"
```

```
res_int <- results(dds_int)
```

## Generate results tables for comparisons

These results should pretty much match the results from above

```
res_int.lodex <- results(dds_int, name = "dex_5_vs_0")  
head(res_int.lodex[ order(res_int.lodex$padj, decreasing = FALSE), ])
```

```
## log2 fold change (MLE): dex 5 vs 0
## Wald test p-value: dex 5 vs 0
## DataFrame with 6 rows and 6 columns
##           baseMean log2FoldChange      lfcSE      stat      pvalue
##           <numeric>      <numeric> <numeric> <numeric>      <numeric>
## ENSG00000256235.3    1054.201      2.56699 0.1042310    24.6279 6.34414e-134
## ENSG00000159200.18    3711.420      1.71182 0.0739485    23.1488 1.49356e-118
## ENSG00000248302.3     921.545      3.08684 0.1333862    23.1421 1.74454e-118
## ENSG00000109501.15     804.747      3.61453 0.1660013    21.7741 4.08120e-105
## ENSG00000174944.9     3855.746      5.78615 0.2802596    20.6457 1.06754e-94
## ENSG00000143119.14     5893.710      1.14805 0.0573598    20.0149 4.08096e-89
##           padj
##           <numeric>
## ENSG00000256235.3  9.29226e-130
## ENSG00000159200.18 8.51742e-115
## ENSG00000248302.3  8.51742e-115
## ENSG00000109501.15 1.49443e-101
## ENSG00000174944.9   3.12724e-91
## ENSG00000143119.14 9.96230e-86
```

```
sum(res_int.lodex$padj < 0.01, na.rm=TRUE)
```

```
## [1] 649
```

```
summary(res_int.lodex, alpha = 0.01)
```

```
##
## out of 21242 with nonzero total read count
## adjusted p-value < 0.01
## LFC > 0 (up)      : 407, 1.9%
## LFC < 0 (down)    : 242, 1.1%
## outliers [1]      : 14, 0.066%
## low counts [2]     : 6581, 31%
## (mean count < 14)
## [1] see 'cooksCutoff' argument of ?results
## [2] see 'independentFiltering' argument of ?results
```

```
sh_res_int.lodex <- lfcShrink(dds_int, coef="dex_5_vs_0", type="apeglm")
```

```
## using 'apeglm' for LFC shrinkage. If used in published research, please cite:
##     Zhu, A., Ibrahim, J.G., Love, M.I. (2018) Heavy-tailed prior distributions for
##     sequence count data: removing the noise and preserving large differences.
##     Bioinformatics. https://doi.org/10.1093/bioinformatics/bty895
```

```
head(sh_res_int.lodex[ order(sh_res_int.lodex$padj, decreasing = FALSE), ])
```



```
## log2 fold change (MAP): dex 5 vs 0
## Wald test p-value: dex 5 vs 0
## DataFrame with 6 rows and 5 columns
##           baseMean log2FoldChange      lfcSE      pvalue      padj
##           <numeric>      <numeric> <numeric>      <numeric>      <numeric>
## ENSG00000256235.3    1054.201      2.55429 0.1043825 6.34414e-134 9.29226e-130
## ENSG00000159200.18   3711.420      1.70325 0.0740799 1.49356e-118 8.51742e-115
## ENSG00000248302.3     921.545      3.07536 0.1336594 1.74454e-118 8.51742e-115
## ENSG00000109501.15    804.747      3.59773 0.1662127 4.08120e-105 1.49443e-101
## ENSG00000174944.9    3855.746      5.75886 0.2808174 1.06754e-94  3.12724e-91
## ENSG00000143119.14   5893.710      1.13795 0.0574369 4.08096e-89  9.96230e-86
```

```
res_int.hidex <- results(dds_int, name = "dex_50_vs_0")
head(res_int.hidex[ order(res_int.hidex$padj, decreasing = FALSE), ])
```

```
## log2 fold change (MLE): dex 50 vs 0
## Wald test p-value: dex 50 vs 0
## DataFrame with 6 rows and 6 columns
##           baseMean log2FoldChange      lfcSE      stat      pvalue
##           <numeric>      <numeric> <numeric> <numeric>      <numeric>
## ENSG00000143119.14   5893.710      2.30880 0.0567756 40.6654 0.00000e+00
## ENSG00000096060.15   7856.732      1.97255 0.0550563 35.8279 4.06128e-281
## ENSG00000265972.6    4263.711      3.07612 0.0911625 33.7433 1.34237e-249
## ENSG00000248302.3     921.545      4.34853 0.1312012 33.1440 6.90993e-241
## ENSG00000159200.18   3711.420      2.39813 0.0734715 32.6403 1.09913e-233
## ENSG00000256235.3    1054.201      3.29998 0.1032100 31.9734 2.55304e-224
##
##           padj
##           <numeric>
## ENSG00000143119.14 0.00000e+00
## ENSG00000096060.15 4.22698e-277
## ENSG00000265972.6  9.31429e-246
## ENSG00000248302.3  3.59593e-237
## ENSG00000159200.18 4.57590e-230
## ENSG00000256235.3  8.85736e-221
```

```
sum(res_int.hidex$padj < 0.01, na.rm=TRUE)
```

```
## [1] 3779
```

```
summary(res_int.hidex, alpha = 0.01)
```

```
##
## out of 21242 with nonzero total read count
## adjusted p-value < 0.01
## LFC > 0 (up)      : 1696, 8%
## LFC < 0 (down)    : 2083, 9.8%
## outliers [1]      : 14, 0.066%
## low counts [2]    : 412, 1.9%
## (mean count < 2)
## [1] see 'cooksCutoff' argument of ?results
## [2] see 'independentFiltering' argument of ?results
```

```
res_int.idel <- results(dds_int, name = "idela_250_vs_0")
head(res_int.idel[ order(res_int.idel$padj, decreasing = FALSE), ])
```

```
## log2 fold change (MLE): idela 250 vs 0
## Wald test p-value: idela 250 vs 0
## DataFrame with 6 rows and 6 columns
##
```

|                       | baseMean  | log2FoldChange | lfcSE     | stat      | pvalue       |
|-----------------------|-----------|----------------|-----------|-----------|--------------|
|                       | <numeric> | <numeric>      | <numeric> | <numeric> | <numeric>    |
| ## ENSG00000134853.12 | 21714.814 | 1.334182       | 0.0578140 | 23.0771   | 7.85601e-118 |
| ## ENSG00000165507.9  | 621.084   | 1.959074       | 0.1356858 | 14.4383   | 2.97021e-47  |
| ## ENSG00000170365.10 | 8105.290  | 0.615688       | 0.0472780 | 13.0227   | 9.08834e-39  |
| ## ENSG00000086730.17 | 839.007   | -1.132965      | 0.0956698 | -11.8425  | 2.35466e-32  |
| ## ENSG00000087495.17 | 965.110   | 1.176041       | 0.0999210 | 11.7697   | 5.59152e-32  |
| ## ENSG00000107537.14 | 1409.967  | 1.199796       | 0.1132524 | 10.5940   | 3.17723e-26  |

```
##
```

|                       | padj         |
|-----------------------|--------------|
|                       | <numeric>    |
| ## ENSG00000134853.12 | 1.15067e-113 |
| ## ENSG00000165507.9  | 2.17524e-43  |
| ## ENSG00000170365.10 | 4.43723e-35  |
| ## ENSG00000086730.17 | 8.62219e-29  |
| ## ENSG00000087495.17 | 1.63798e-28  |
| ## ENSG00000107537.14 | 7.75614e-23  |

```
sum(res_int.idel$padj < 0.01, na.rm=TRUE)
```

```
## [1] 418
```

```
summary(res_int.idel, alpha = 0.01)
```

```
##
## out of 21242 with nonzero total read count
## adjusted p-value < 0.01
## LFC > 0 (up)      : 208, 0.98%
## LFC < 0 (down)    : 210, 0.99%
## outliers [1]      : 14, 0.066%
## low counts [2]    : 6581, 31%
## (mean count < 14)
## [1] see 'cooksCutoff' argument of ?results
## [2] see 'independentFiltering' argument of ?results
```

```
test2 <- results(dds_int, contrast = list( c("dex_50_vs_0", "idela_250_vs_0", "dex50.idela250")))
summary(test2, alpha = 0.01)
```

```
##
## out of 21242 with nonzero total read count
## adjusted p-value < 0.01
## LFC > 0 (up)      : 2164, 10%
## LFC < 0 (down)    : 2802, 13%
## outliers [1]      : 14, 0.066%
## low counts [2]    : 824, 3.9%
## (mean count < 3)
## [1] see 'cooksCutoff' argument of ?results
## [2] see 'independentFiltering' argument of ?results
```

These are the interaction results.

The interaction term, answering: is the condition effect *different* across genotypes? In this case, idela is the genotype - so does dex do something different in the presence of idela? results(dds, name="idela250.dex...")

```
res_int.5int <- results(dds_int, name = "dex5.idela250")
head(res_int.5int[ order(res_int.5int$padj, decreasing = FALSE), ])
```

```
## log2 fold change (MLE): dex5.idela250
## Wald test p-value: dex5.idela250
## Dataframe with 6 rows and 6 columns
##
```

|                    | baseMean  | log2FoldChange | lfcSE     | stat     | pvalue      |
|--------------------|-----------|----------------|-----------|----------|-------------|
| ENSG00000100280.17 | 2462.281  | 0.653120       | 0.1177848 | 5.54503  | 2.93910e-08 |
| ENSG00000165507.9  | 621.084   | -0.983224      | 0.1808470 | -5.43677 | 5.42545e-08 |
| ENSG00000111371.16 | 14645.798 | 0.308036       | 0.0578936 | 5.32073  | 1.03351e-07 |
| ENSG00000134853.12 | 21714.814 | -0.430490      | 0.0815552 | -5.27851 | 1.30238e-07 |
| ENSG00000088305.19 | 562.270   | 0.888653       | 0.1700857 | 5.22474  | 1.74401e-07 |
| ENSG00000066923.18 | 865.979   | 0.828551       | 0.1675293 | 4.94571  | 7.58675e-07 |

```
##
```

|                    | padj        |
|--------------------|-------------|
| ENSG00000100280.17 | 0.000564681 |
| ENSG00000165507.9  | 0.000564681 |
| ENSG00000111371.16 | 0.000677758 |
| ENSG00000134853.12 | 0.000677758 |
| ENSG00000088305.19 | 0.000726065 |
| ENSG00000066923.18 | 0.002632095 |

```
##
```

```
sum(res_int.5int$padj < 0.05, na.rm=TRUE)
```

```
## [1] 18
```

```
summary(res_int.5int, alpha = 0.05)
```

```
##
## out of 21242 with nonzero total read count
## adjusted p-value < 0.05
## LFC > 0 (up)      : 13, 0.061%
## LFC < 0 (down)    : 5, 0.024%
## outliers [1]      : 14, 0.066%
## low counts [2]    : 412, 1.9%
## (mean count < 2)
## [1] see 'cooksCutoff' argument of ?results
## [2] see 'independentFiltering' argument of ?results
```

```
res_int.50int <- results(dds_int, name = "dex50.idela250")
head(res_int.50int[ order(res_int.50int$padj, decreasing = FALSE), ])
```

```
## log2 fold change (MLE): dex50.idela250
## Wald test p-value: dex50.idela250
## DataFrame with 6 rows and 6 columns
##
```

|                       | baseMean  | log2FoldChange | lfcSE     | stat      | pvalue      |
|-----------------------|-----------|----------------|-----------|-----------|-------------|
| ##                    | <numeric> | <numeric>      | <numeric> | <numeric> | <numeric>   |
| ## ENSG00000165507.9  | 621.084   | -1.361687      | 0.1790091 | -7.60680  | 2.80962e-14 |
| ## ENSG00000134853.12 | 21714.814 | -0.540481      | 0.0817261 | -6.61332  | 3.75801e-11 |
| ## ENSG00000103995.14 | 4195.779  | -0.620638      | 0.1034555 | -5.99908  | 1.98444e-09 |
| ## ENSG00000170365.10 | 8105.290  | -0.392716      | 0.0658787 | -5.96120  | 2.50397e-09 |
| ## ENSG00000120833.14 | 5901.363  | -0.632532      | 0.1101617 | -5.74185  | 9.36483e-09 |
| ## ENSG00000157557.13 | 2168.807  | -0.494089      | 0.0926364 | -5.33364  | 9.62654e-08 |

```
##
```

|                       | padj        |
|-----------------------|-------------|
| ##                    | <numeric>   |
| ## ENSG00000165507.9  | 4.80838e-10 |
| ## ENSG00000134853.12 | 3.21573e-07 |
| ## ENSG00000103995.14 | 1.07132e-05 |
| ## ENSG00000170365.10 | 1.07132e-05 |
| ## ENSG00000120833.14 | 3.20539e-05 |
| ## ENSG00000157557.13 | 2.74581e-04 |

```
sum(res_int.50int$padj < 0.05, na.rm=TRUE)
```

```
## [1] 72
```

```
summary(res_int.50int, alpha = 0.05)
```

```
##
## out of 21242 with nonzero total read count
## adjusted p-value < 0.05
## LFC > 0 (up)      : 30, 0.14%
## LFC < 0 (down)    : 42, 0.2%
## outliers [1]      : 14, 0.066%
## low counts [2]    : 4114, 19%
## (mean count < 6)
## [1] see 'cooksCutoff' argument of ?results
## [2] see 'independentFiltering' argument of ?results
```

# Make a list of genes with strong interaction terms

## Function to add Gene symbols

```
res.5int <- add_geneids(res_int.5int)
```

```
## 'select()' returned 1:many mapping between keys and columns  
## 'select()' returned 1:many mapping between keys and columns  
## 'select()' returned 1:many mapping between keys and columns
```

```
res.5int_sig <- res.5int %>%  
  as.data.frame() %>%  
  rownames_to_column('ensembl') %>%  
  dplyr::filter(padj <= 0.05, abs(log2FoldChange) <= 10)  
  
res.50int <- add_geneids(res_int.50int)
```

```
## 'select()' returned 1:many mapping between keys and columns  
## 'select()' returned 1:many mapping between keys and columns  
## 'select()' returned 1:many mapping between keys and columns
```

```
res.50int_sig <- res.50int %>%  
  as.data.frame() %>%  
  rownames_to_column('ensembl') %>%  
  dplyr::filter(padj <= 0.05, abs(log2FoldChange) <= 10)  
  
#Are any of these common between them?  
  
common_int <- res.5int_sig %>%  
  inner_join(res.50int_sig, by = "ensembl")
```

## Bar charts for key genes

Join results for lowdex into table

New function to add gene IDs to a tibble

```
add_geneids_tbl <- function(genelist) {  
  genelist$symbol <- mapIds(org.Hs.eg.db, keys=str_sub(genelist$ensembl, 1, 15), column="SYMBOL", keytype="ENSEMBL", multiVals="first")  
  genelist$entrez <- mapIds(org.Hs.eg.db, keys=str_sub(genelist$ensembl, 1, 15), column="ENTREZID", keytype="ENSEMBL", multiVals="first")  
  genelist$genename <- mapIds(org.Hs.eg.db, keys=str_sub(genelist$ensembl, 1, 15), column="GENENAME", keytype="ENSEMBL", multiVals="first")  
  # genelist <- genelist %>% drop_na(log2FoldChange)  
  return(genelist)  
}
```

```

idela_drg <- res.idel %>%
  as.data.frame()
names(idela_drg) <- paste0("idela.", names(idela_drg))
idela_drg <- idela_drg %>%
  rownames_to_column(var = "ensembl")

lodex_drg <- res.lodex %>%
  as.data.frame()
names(lodex_drg) <- paste0("lodex.", names(lodex_drg))
lodex_drg <- lodex_drg %>%
  rownames_to_column(var = "ensembl")

lob_drg <- res.lob %>%
  as.data.frame()
names(lob_drg) <- paste0("loboth.", names(lob_drg))
lob_drg <- lob_drg %>%
  rownames_to_column(var = "ensembl")

lodex_merge <- idela_drg %>%
  left_join(lodex_drg, by = "ensembl") %>%
  left_join(lob_drg, by = "ensembl") %>%
  add_geneids_tbl() %>%
  arrange(symbol, ensembl) %>%
  filter(!duplicated(symbol))

```

```

## 'select()' returned 1:many mapping between keys and columns
## 'select()' returned 1:many mapping between keys and columns
## 'select()' returned 1:many mapping between keys and columns

```

```

lodex_merge_longer <- lodex_merge %>%
  pivot_longer(idela.baseMean:loboth.padj, names_to = c("treatment", ".value"), names_pattern =
    = "(^\\w+).(\\w+$)") %>%
  mutate(treatment = factor(treatment, levels = c("idela", "lodex", "loboth")))

```

## Plot normally regulated genes

Start with a set that we know

```

reg_genes <- c("RCAN1", "KCNJ2", "FKBP5", "P2RY14", "SOCS2", "IL7R")
lodex_merge_longer %>%
  dplyr::filter(symbol %in% reg_genes) %>%
  ggplot(aes(treatment, log2FoldChange, fill = treatment)) +
  labs(x = "", y = "log2FoldChange") +
  geom_col(position = "dodge") +
  scale_fill_viridis(discrete = T, option = "E") +
  facet_wrap(~symbol) + theme_bw() +
  theme(legend.position="none", axis.text.x = element_text(angle = 45, hjust = 1)) +
  geom_errorbar(aes(ymin=log2FoldChange-lfcSE, ymax=log2FoldChange+lfcSE), position = position_dodge(width = 0.9), width=0.5, colour="black", size = 0.5)

```

```
## Warning: Using `size` aesthetic for lines was deprecated in ggplot2 3.4.0.
## i Please use `linewidth` instead.
```

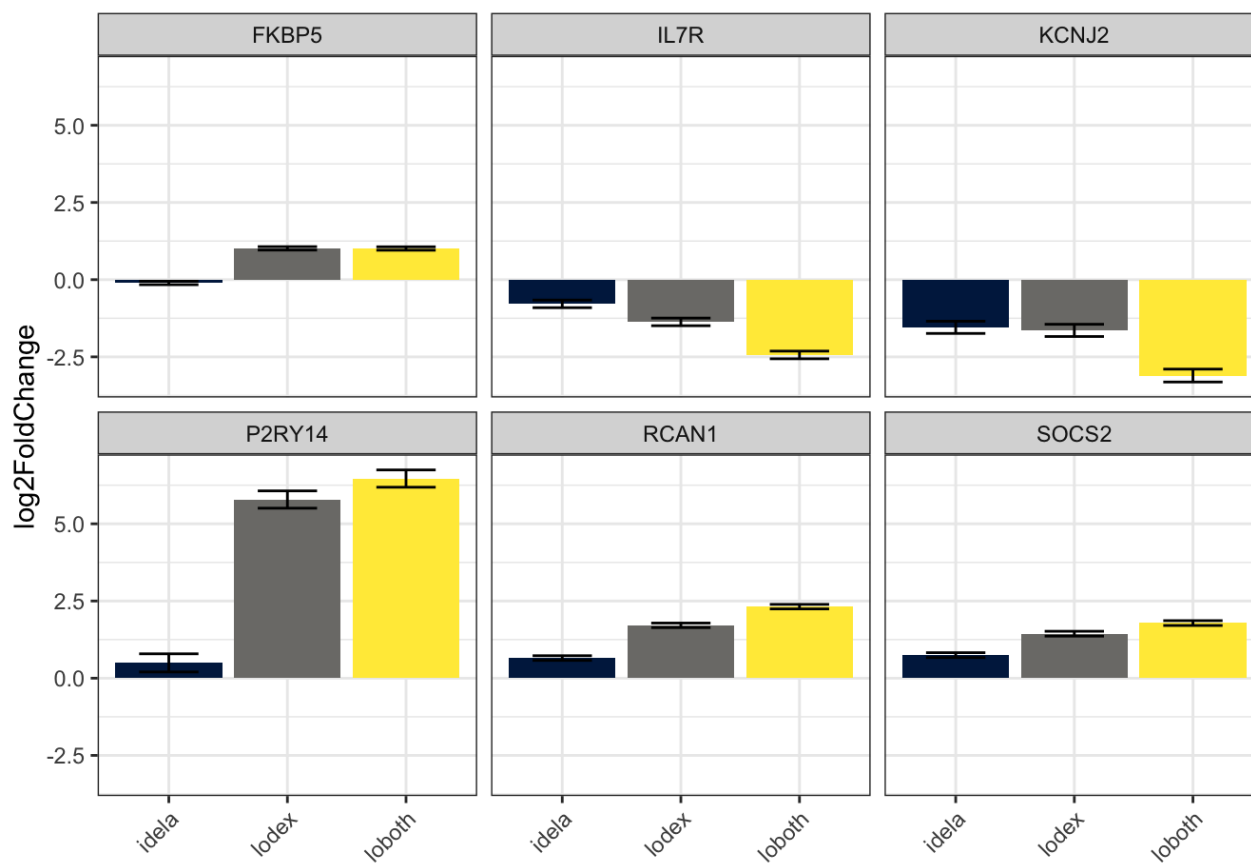

```
reg_genes <- c("BCL2L1", "BCL2", "IL7R", "TXNIP", "MBNL1", "BMF")
lodex_merge_longer %>%
  dplyr::filter(symbol %in% reg_genes) %>%
  ggplot(aes(treatment, log2FoldChange, fill = treatment)) +
  labs(x = "", y = "log2FoldChange") +
  geom_col(position = "dodge") +
  scale_fill_viridis(discrete = T, option = "E") +
  facet_wrap(~symbol) + theme_bw() +
  theme(legend.position="none", axis.text.x = element_text(angle = 45, hjust = 1)) +
  geom_errorbar(aes(ymin=log2FoldChange-lfcSE, ymax=log2FoldChange+lfcSE), position = position_dodge(width = 0.9), width=0.5, colour="black", size = 0.5)
```

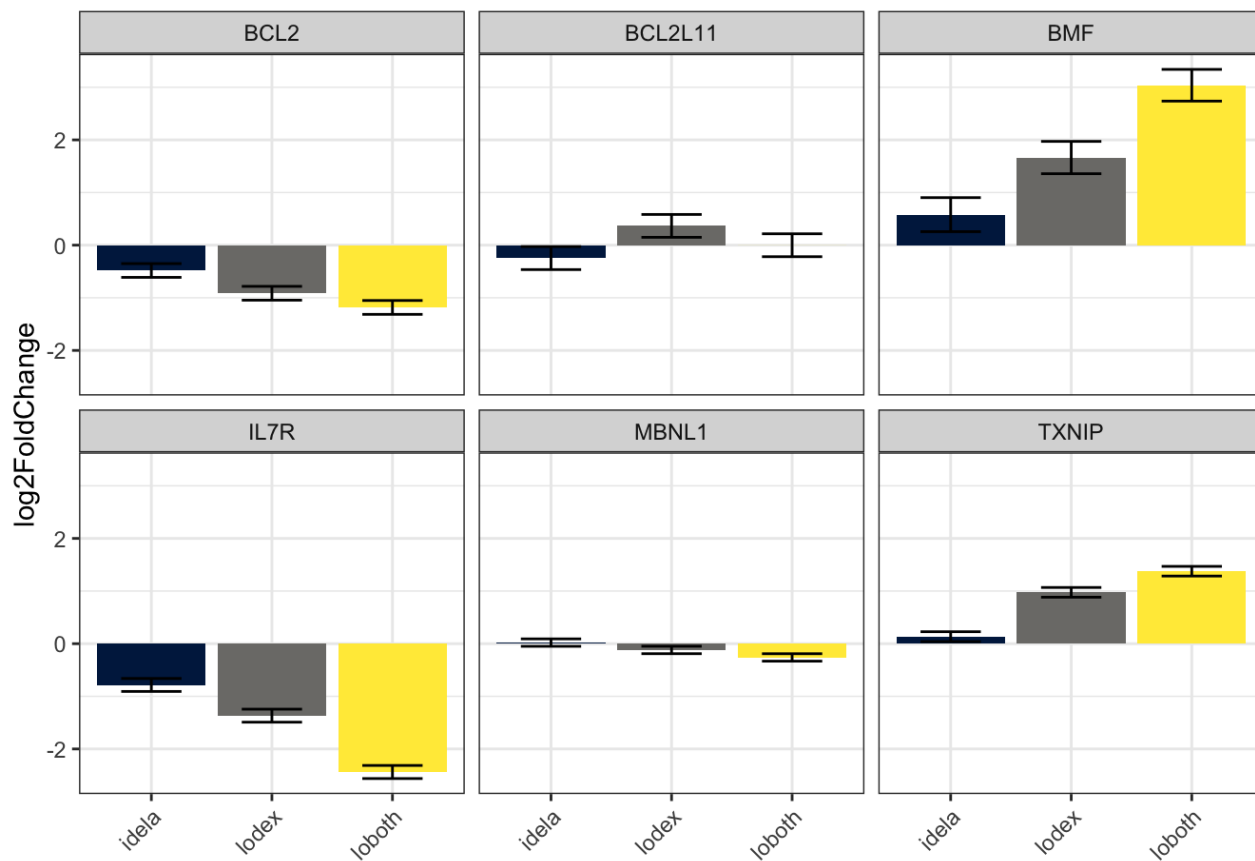

## Plot interaction genes

```
int_genes <- res.5int_sig %>%
  filter(abs(log2FoldChange) < 10) %>%
  na.omit() %>%
  pull(symbol)

lodex_merge_longer %>%
  dplyr::filter(symbol %in% int_genes) %>%
  ggplot(aes(treatment, log2FoldChange, fill = treatment)) +
  labs(x = "", y = "log2FoldChange") +
  geom_col(position = "dodge") +
  scale_fill_viridis(discrete = T, option = "E") +
  facet_wrap(~symbol) + theme_bw() +
  theme(legend.position="none", axis.text.x = element_text(angle = 45, hjust = 1)) +
  geom_errorbar(aes(ymin=log2FoldChange-lfcSE, ymax=log2FoldChange+lfcSE), position = position_dodge(width = 0.9), width=0.5, colour="black", size = 0.5)
```





```
#Merge screen and regulation data
names(full_rhos) <- c("number", "entrez", "symbol", "genename", "shRNAs", "Remaining_shRNAs",
"Rho_phenotype", "Rho_pvalue", "Rho_qvalue")
full_rhos_min <- full_rhos[,c(3,7,8)]
names(cagek_rhos) <- c("entrez", "symbol", "genename", "shRNAs", "Remaining_shRNAs", "CAGEK_Rho_phenotype", "CAGEK_Rho_pvalue")
```

```
## Warning: The `value` argument of `names<-` must have the same length as `x` as of tibble
## 3.0.0.
## i `names` must have length 8, not 7.
```

```
## Warning: The `value` argument of `names<-` can't be empty as of tibble 3.0.0.
## i Column 8 must be named.
```

```
cagek_rhos_min <- cagek_rhos[,c(1,6,7)] %>%
  mutate(entrez = as.character(entrez))
names(full_gammas) <- c("number", "entrez", "symbol", "genename", "shRNAs", "Remaining_shRNAs", "Gamma_phenotype", "Gamma_pvalue", "Gamma_qvalue")
full_gammas_min <- full_gammas[,c(3,7,8)]
names(cagek_gammas) <- c("entrez", "symbol", "genename", "shRNAs", "Remaining_shRNAs", "CAGEK_Gamma_phenotype", "CAGEK_Gamma_pvalue")
cagek_gammas_min <- cagek_gammas[,c(1,6,7)] %>%
  mutate(entrez = as.character(entrez))

# Just makes tables with both expression and screen phenotype data

full_effector_tbl <- sum_tbl_2 %>%
  inner_join(full_rhos_min, by = "symbol") %>%
  inner_join(full_gammas_min, by = "symbol")

cagek_effector_tbl <- sum_tbl_2 %>%
  inner_join(cagek_rhos_min, by = "entrez") %>%
  inner_join(cagek_gammas_min, by = "entrez")
```

## What are the effector genes for High Dex?

### 1. Positive Effectors

```
pos_full_effectors <- full_effector_tbl %>%
  filter(Rho_pvalue < 0.05 & hidex_adjp < 0.05 & Rho_phenotype > 0 & hidex_log2FC > 0)

write.csv(pos_full_effectors, "pos_nalm6_full_effectors.csv")

pos_cagek_effectors <- cagek_effector_tbl %>%
  filter(CAGEK_Rho_pvalue < 0.05 & hidex_adjp < 0.05 & CAGEK_Rho_phenotype > 0 & hidex_log2FC
> 0)

all_pos_eff <- pos_full_effectors %>%
  full_join(pos_cagek_effectors, by = "symbol")

common_pos_eff <- pos_full_effectors %>%
  inner_join(pos_cagek_effectors, by = "symbol")
```

```
ggplot(common_pos_eff, aes(hidex_log2FC.x, hiboth_log2FC.x, label = symbol)) +
  labs(title = "Highest confidence positive effectors", y = "50 nM Dex + Idela, log2FC", x =
"50 nM Dex, log2FC") +
  geom_point() +
  geom_text_repel(size = 3, max.overlaps = 12, max.iter = 1000000, label.padding = 0.1) +
  geom_abline(slope = 1, intercept = 0, color = "red", size = 1) +
  xlim(0,5.1) + ylim(0, 5.1) +
  theme_bw() +
  theme(axis.title = element_text(face="bold"), plot.title = element_text(face = "bold")) +
  annotate("rect", xmin = 0, xmax = 5.1, ymin = 0, ymax = 5.1, fill= "purple", alpha = 0.1)
```

```
## Warning in geom_text_repel(size = 3, max.overlaps = 12, max.iter = 1e+06, :
## Ignoring unknown parameters: `label.padding`
```

```
## Warning: ggrepel: 9 unlabeled data points (too many overlaps). Consider
## increasing max.overlaps
```

## Highest confidence positive effectors

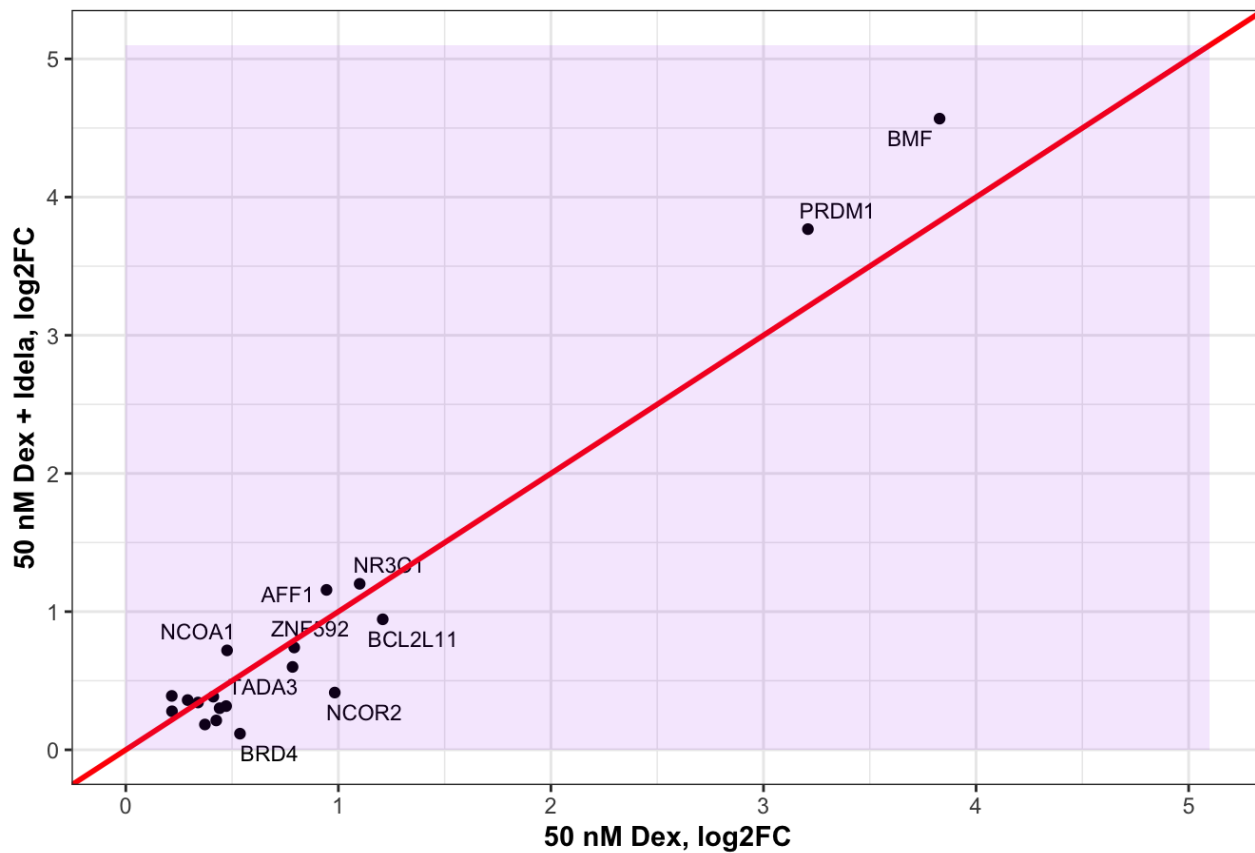

```
ggsave("common_pos_effectors.pdf", width = 5, height = 5)
```

```
## Warning: ggrepel: 9 unlabeled data points (too many overlaps). Consider
## increasing max.overlaps
```

## Pos effectors at low dex

```
ggplot(common_pos_eff, aes(lodex_log2FC.x, loboth_log2FC.x, label = symbol)) +
  labs(title = "Highest confidence positive effectors", y = "5 nM Dex + Idela, log2FC", x =
"5 nM Dex, log2FC") +
  geom_point() +
  geom_text_repel(size = 3, max.overlaps = 12, max.iter = 1000000, label.padding = 0.1) +
  geom_abline(slope = 1, intercept = 0, color = "red", size = 1) +
  xlim(0, 3.5) + ylim(0, 3.5) +
  theme_bw() +
  theme(axis.title = element_text(face="bold"), plot.title = element_text(face = "bold")) +
  annotate("rect", xmin = 0, xmax = 3.5, ymin = 0, ymax = 3.5, fill = "purple", alpha = 0.1)
```

```
## Warning in geom_text_repel(size = 3, max.overlaps = 12, max.iter = 1e+06, :
## Ignoring unknown parameters: `label.padding`
```

```
## Warning: Removed 3 rows containing missing values (`geom_point()`).
```

```
## Warning: Removed 3 rows containing missing values (`geom_text_repel()`).
```

```
## Warning: ggrepel: 8 unlabeled data points (too many overlaps). Consider
## increasing max.overlaps
```

### Highest confidence positive effectors

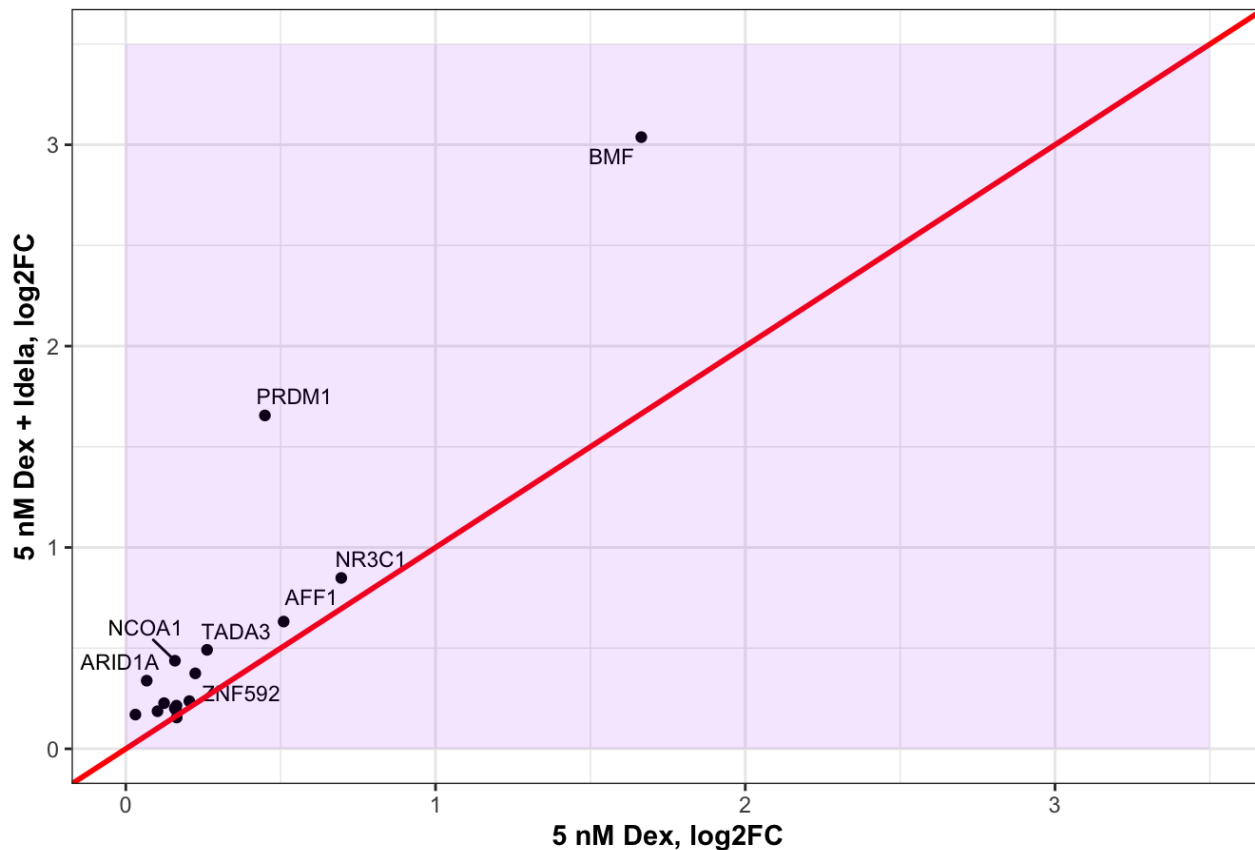

Does addition of idela cause regulation of common positive effectors to look like hidex?

```
ggplot(common_pos_eff) +
  geom_point(aes(lodex_log2FC.x, loboth_log2FC.x), color = "black") +
  geom_point(aes(lodex_log2FC.x, hidex_log2FC.x, label = symbol), color = "red") +
  labs(y = "50 nM Dex, red, 5 nM Dex + Idela, black", x = "5 nM Dex, log2FC") +
  #geom_text_repel(size = 3, max.overlaps = 12, max.iter = 1000000, label.padding = 0.1) +
  geom_abline(slope = 1, intercept = 0, color = "red", size = 1) +
  # xlim(0, 3.5) + ylim(0, 3.5) +
  theme_bw() +
  theme(axis.title = element_text(face="bold"), plot.title = element_text(face = "bold")) +
  annotate("rect", xmin = 0, xmax = 3.5, ymin = 0, ymax = 3.5, fill= "purple", alpha = 0.1)
```

```
## Warning in geom_point(aes(lodex_log2FC.x, hidex_log2FC.x, label = symbol), :
## Ignoring unknown aesthetics: label
```

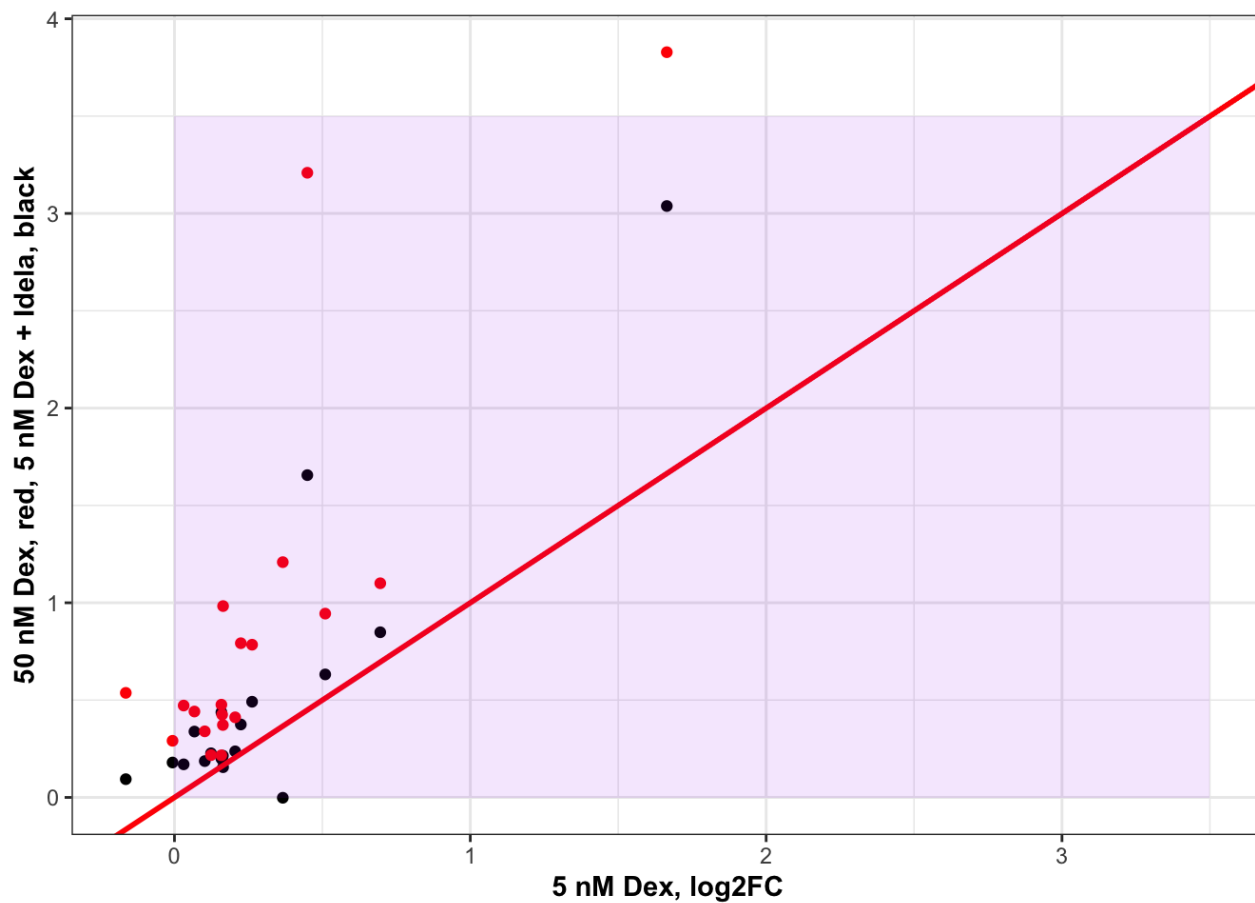

```
cpe_lng <- common_pos_eff %>%
  select(symbol, lodex_log2FC.x, loboth_log2FC.x, hidex_log2FC.x, hiboth_log2FC.x) %>%
  pivot_longer(cols = c("lodex_log2FC.x", "loboth_log2FC.x", "hidex_log2FC.x", "hiboth_log2FC.x"),
    values_to = "log2FC", names_to = "Condition")
ggplot(cpe_lng, aes(x= log2FC, y= reorder(symbol, log2FC))) +
  geom_line() +
  geom_point(aes(color=Condition), size=2) +
  scale_color_viridis(discrete = T, option = "E") +
  theme_bw() + ylab("Effector Gene")+
  theme(legend.position="top")
```

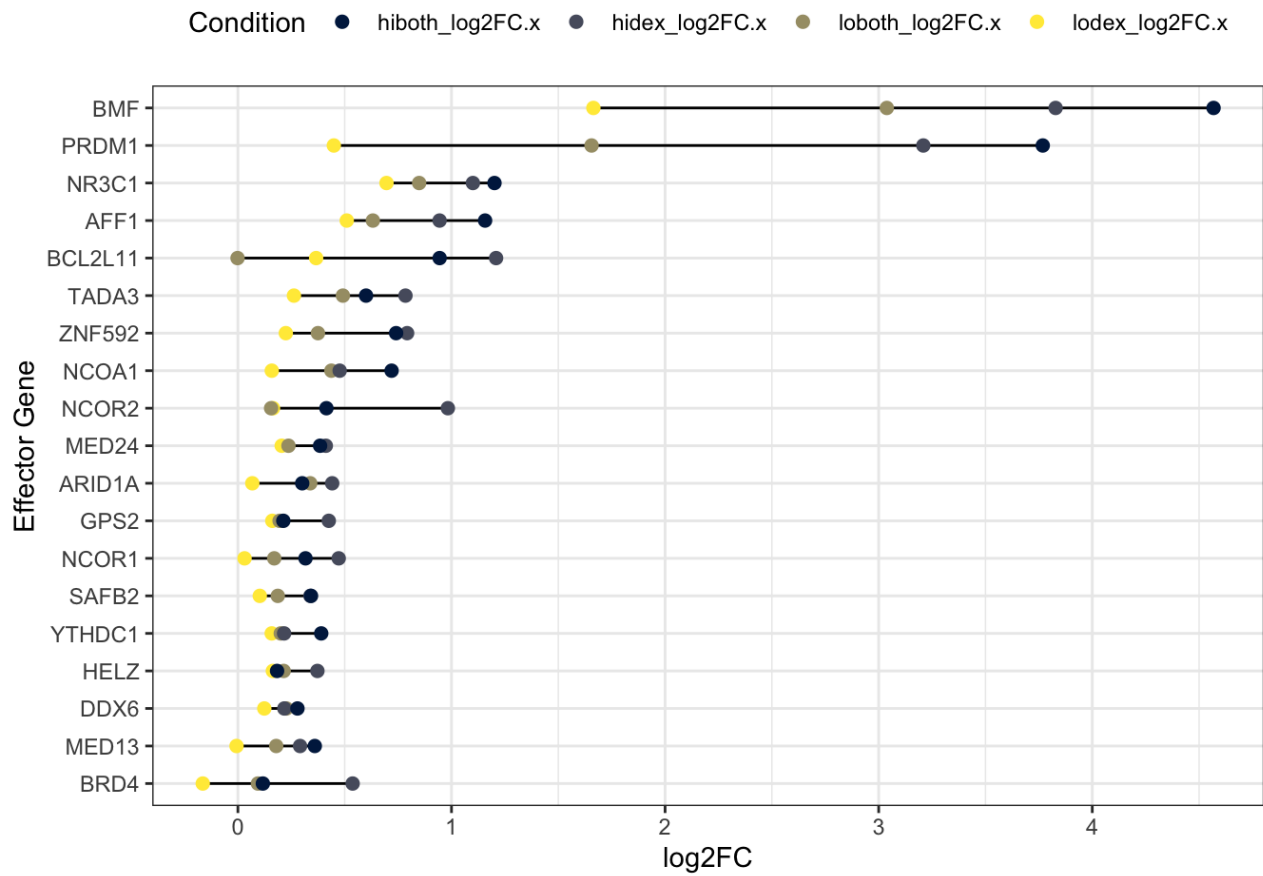

```
ggsave("pos_eff_reg_cond.pdf", width = 8, height = 4)
```

## 2. Negative Effectors

```

neg_full_effectors <- full_effector_tbl %>%
  filter(Rho_pvalue < 0.05 & hidex_adjp < 0.05 & Rho_phenotype < 0 & hidex_log2FC < 0)

write.csv(neg_full_effectors, "neg_nalm6_full_effectors.csv")

neg_cagek_effectors <- cagek_effector_tbl %>%
  filter(CAGEK_Rho_pvalue < 0.05 & hidex_adjp < 0.05 & CAGEK_Rho_phenotype < 0 & hidex_log2FC
< 0)

all_neg_eff <- neg_full_effectors %>%
  full_join(neg_cagek_effectors, by = "symbol")

common_neg_eff <- neg_full_effectors %>%
  inner_join(neg_cagek_effectors, by = "symbol")

ggplot(common_neg_eff, aes(hidex_log2FC.x, hiboth_log2FC.x, label = symbol)) +
  labs(title = "Highest confidence negative effectors", y = "50 nM Dex + Idela, log2FC", x =
"50 nM Dex, log2FC") +
  geom_point() +
  geom_text_repel(size = 3, max.overlaps = 12, max.iter = 1000000) +
  geom_abline(slope = 1, intercept = 0, color = "red", size = 1) +
  xlim(-1.6, 0.1) + ylim(-1.6, 0.1) +
  theme_bw() +
  theme(axis.title = element_text(face="bold"), plot.title = element_text(face = "bold")) +
  annotate("rect", xmin = -1.6, xmax = 0.1, ymin = -1.6, ymax = 0.1 , fill= "green", alpha =
0.1)

```

```
## Warning: Removed 1 rows containing missing values (`geom_point()`).
```

```
## Warning: Removed 1 rows containing missing values (`geom_text_repel()`).
```



## Highest confidence negative effectors

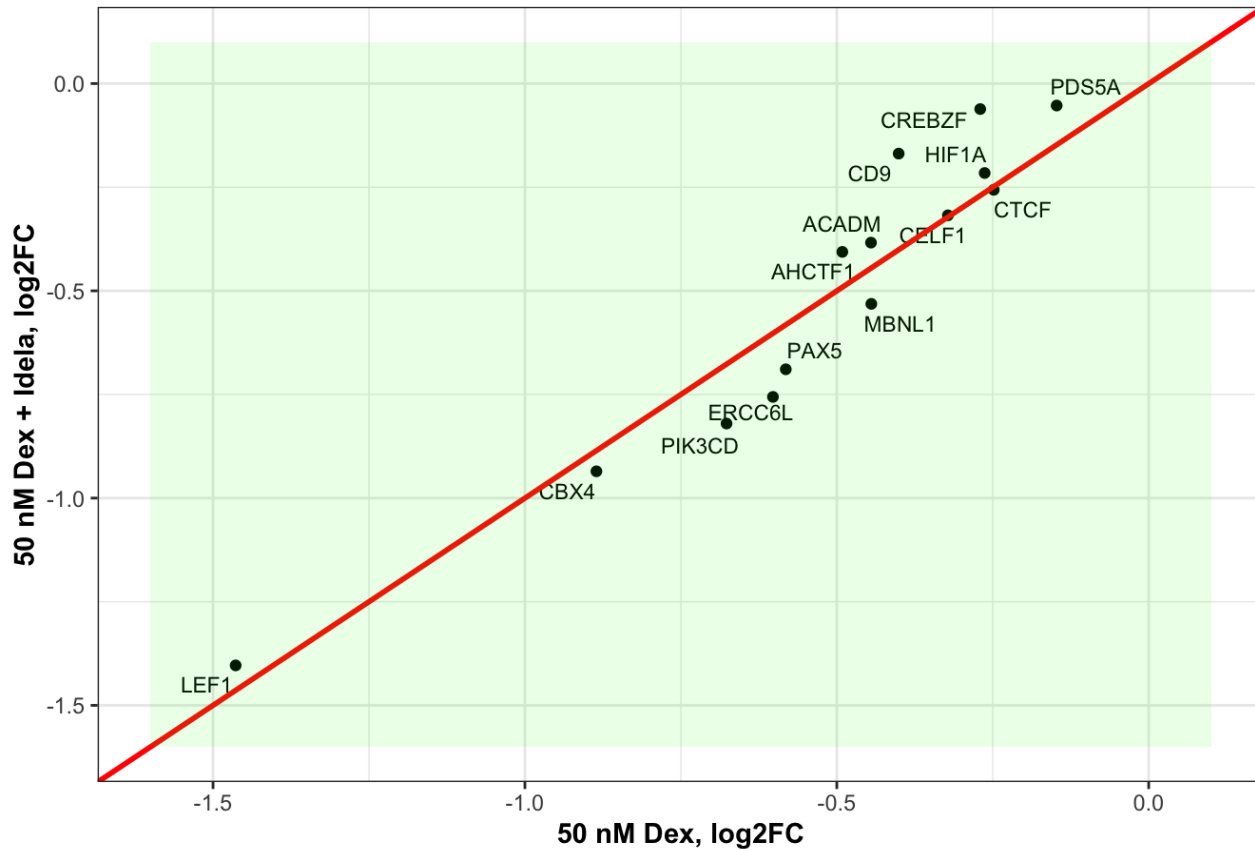

```
ggsave("common_neg_effectors.pdf", width = 5, height= 5)
```

```
## Warning: Removed 1 rows containing missing values (`geom_point()`).
## Removed 1 rows containing missing values (`geom_text_repel()`).
```

```
cne_lng <- common_neg_eff %>%
  select(symbol, lodex_log2FC.x, loboth_log2FC.x, hidex_log2FC.x, hiboth_log2FC.x) %>%
  pivot_longer(cols = c("lodex_log2FC.x", "loboth_log2FC.x", "hidex_log2FC.x", "hiboth_log2FC.x"),
    values_to = "log2FC", names_to = "Condition")
ggplot(cne_lng, aes(x= log2FC, y= reorder(symbol, log2FC))) +
  geom_line() +
  geom_point(aes(color=Condition), size=2) +
  scale_color_viridis(discrete = T, option = "E") +
  theme_bw() + ylab("Effector Gene")+
  theme(legend.position="top")
```

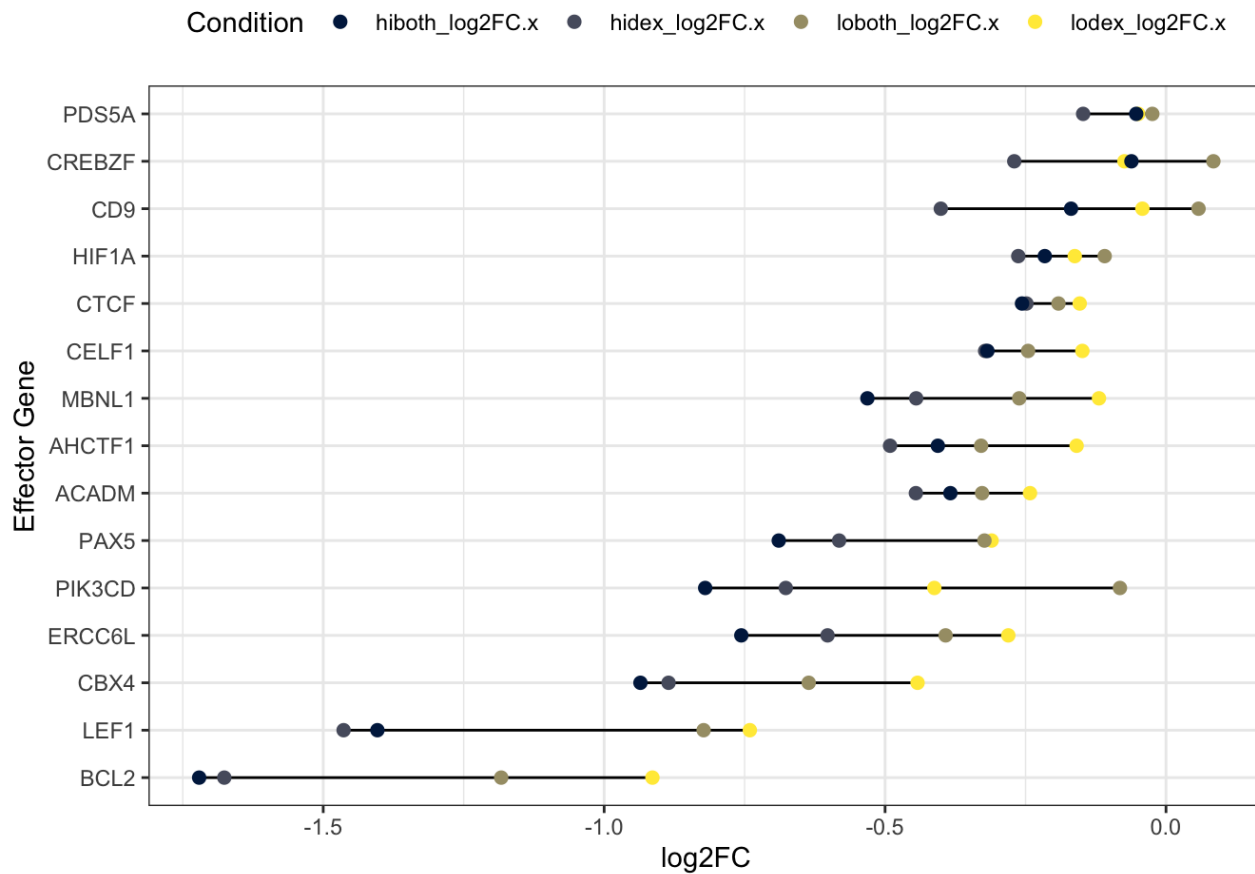

```
ggsave("neg_eff_reg_cond.pdf", width = 8, height = 4)

ce_lng <- bind_rows(cpe_lng, cne_lng)

ggplot(ce_lng, aes(x= log2FC, y= reorder(symbol, log2FC))) +
  geom_line() +
  geom_point(aes(color=Condition), size=2) +
  scale_color_viridis(discrete = T, option = "E") +
  theme_bw() + ylab("Effector Gene")+
  theme(legend.position="top")
```

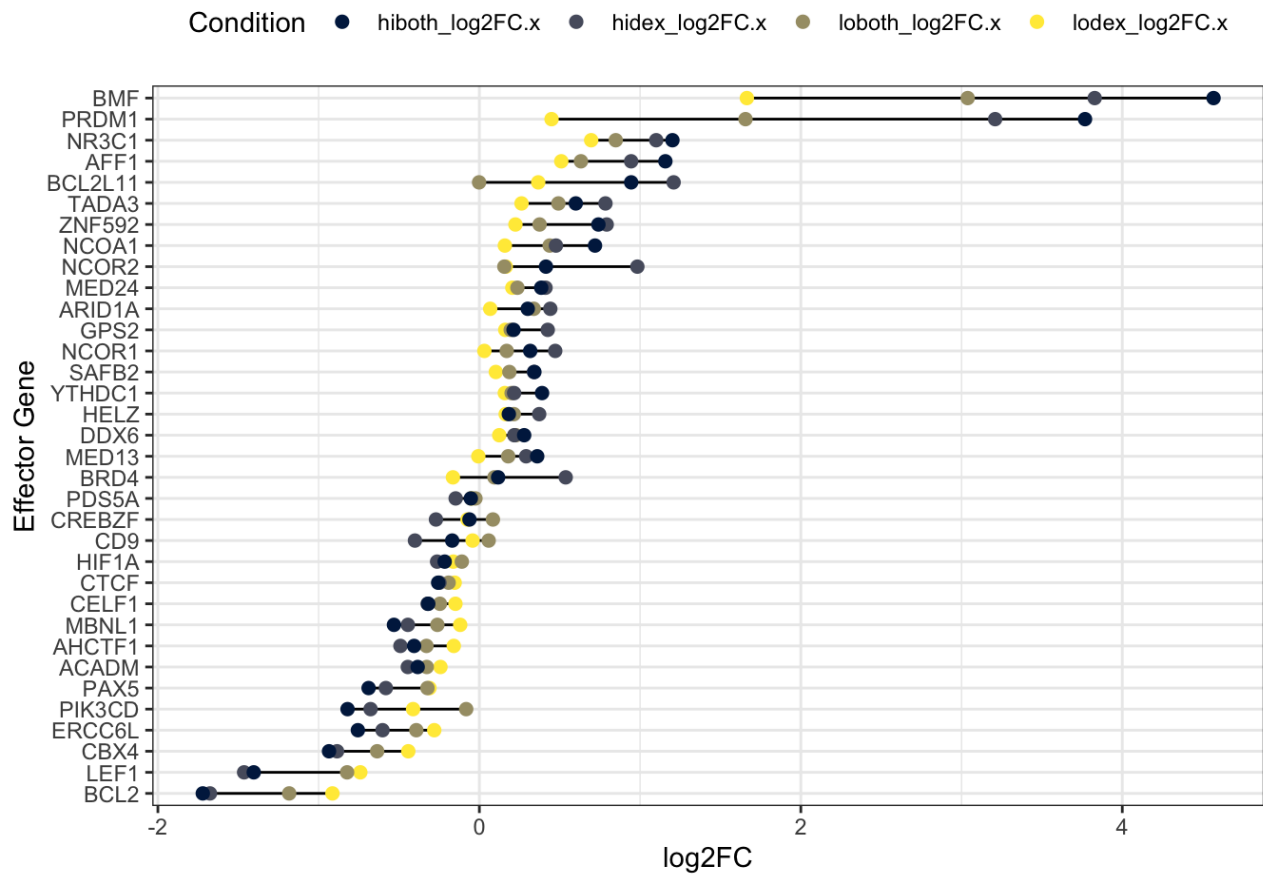

```
ggsave("eff_reg_cond.pdf", width = 7, height = 6)
```

for lodex

**Are effector genes more strongly regulated in response to idela**

## than other genes?

```
# ttest for enhanced upregulation by idela

test_up <- lodex_reg_filt %>%
  filter(loboth_log2FC > 0)

eff_1 <- ce_lng %>%
  dplyr::filter(Condition %in% c("lodex_log2FC.x", "loboth_log2FC.x")) %>%
  mutate(Condition = factor(Condition, levels = c("lodex_log2FC.x", "loboth_log2FC.x"))) %>%
  ggplot(aes(Condition, log2FC)) +
  ggtitle("Low dex, upregulated genes") + ylab("log2FC") + xlab("") +
  geom_boxplot() +
  theme(axis.text.x = element_text(angle = 45, hjust = 1)) +
  theme_bw()

eff_up <- ce_lng %>%
  dplyr::filter(Condition %in% c("lodex_log2FC.x", "loboth_log2FC.x") & log2FC > 0) %>%
  mutate(Condition = factor(Condition, levels = c("lodex_log2FC.x", "loboth_log2FC.x"))) %>%
  ggplot(aes(Condition, log2FC)) +
  ylab("log2FC") + xlab("") +
  geom_boxplot() +
  ylim(-1.5, 3.5) +
  theme_bw() +
  theme(axis.text.x = element_text(angle = 45, hjust = 1))

eff_down <- ce_lng %>%
  dplyr::filter(Condition %in% c("lodex_log2FC.x", "loboth_log2FC.x") & log2FC < 0) %>%
  mutate(Condition = factor(Condition, levels = c("lodex_log2FC.x", "loboth_log2FC.x"))) %>%
  ggplot(aes(Condition, log2FC)) +
  ylab("log2FC") + xlab("") +
  geom_boxplot() +
  ylim(-1.5, 3.5) +
  theme_bw() +
  theme(axis.text.x = element_text(angle = 45, hjust = 1))

box_eff_lowboth <- grid.arrange(eff_up, eff_down, nrow = 1)
```

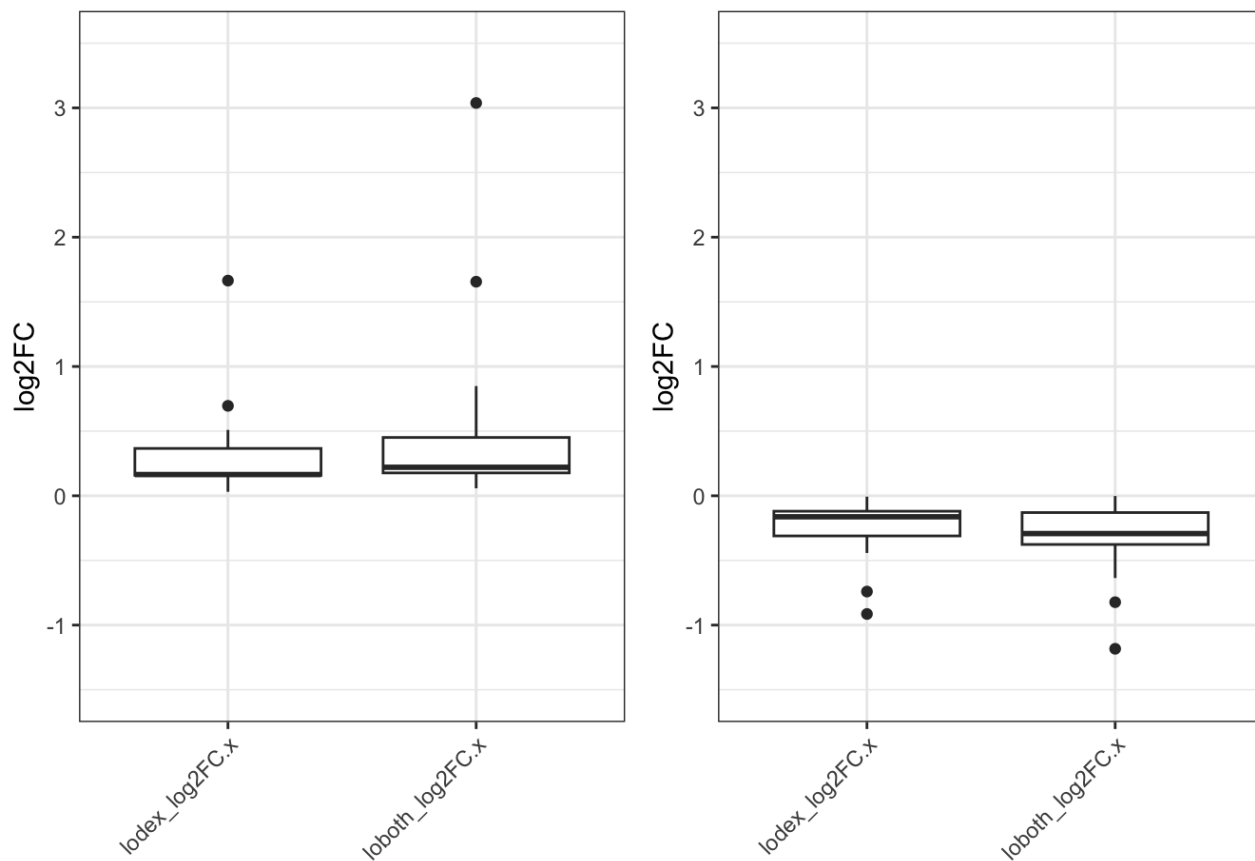

```
ggsave(filename = "boxplot_eff_dex_dex_lo.pdf", height = 4, width = 3, box_eff_lowboth)

sum_eff <- sum_table %>%
  dplyr::filter(symbol %in% ce_lng$symbol)

eff_up_table <- sum_eff %>%
  dplyr::filter(loboth_log2FC > 0 | lodex_log2FC > 0)

t.test(eff_up_table$loboth_log2FC, eff_up_table$lodex_log2FC, paired = TRUE)
```

```
##
## Paired t-test
##
## data: eff_up_table$loboth_log2FC and eff_up_table$lodex_log2FC
## t = 2.6259, df = 20, p-value = 0.01619
## alternative hypothesis: true mean difference is not equal to 0
## 95 percent confidence interval:
## 0.04500288 0.39270091
## sample estimates:
## mean difference
## 0.2188519
```

```
eff_down_table <- sum_eff %>%
  dplyr::filter(loboth_log2FC < 0 | lodex_log2FC < 0)

t.test(eff_down_table$loboth_log2FC, eff_down_table$lodex_log2FC, paired = TRUE)
```

```
##
## Paired t-test
##
## data: eff_down_table$loboth_log2FC and eff_down_table$lodex_log2FC
## t = -0.58989, df = 17, p-value = 0.563
## alternative hypothesis: true mean difference is not equal to 0
## 95 percent confidence interval:
## -0.11642160 0.06554521
## sample estimates:
## mean difference
## -0.0254382
```

```
t.test(abs(sum_eff$loboth_log2FC), abs(sum_eff$lodex_log2FC), paired = TRUE)
```

```
##
## Paired t-test
##
## data: abs(sum_eff$loboth_log2FC) and abs(sum_eff$lodex_log2FC)
## t = 2.5568, df = 33, p-value = 0.01535
## alternative hypothesis: true mean difference is not equal to 0
## 95 percent confidence interval:
## 0.02894599 0.25444377
## sample estimates:
## mean difference
## 0.1416949
```

```
sum_eff %>%
  dplyr::filter(hiboth_log2FC > 0 | hidex_log2FC > 0) %>%
  t.test(.$hiboth_log2FC, .$hidex_log2FC, data = ., paired = TRUE)
```

```
##
## Paired t-test
##
## data: .$hiboth_log2FC and .$hidex_log2FC
## t = -0.037824, df = 18, p-value = 0.9702
## alternative hypothesis: true mean difference is not equal to 0
## 95 percent confidence interval:
## -0.1527794 0.1473756
## sample estimates:
## mean difference
## -0.002701932
```

```
sum_eff %>%
  dplyr::filter(hiboth_log2FC < 0 | hidex_log2FC < 0) %>%
  t.test(.$hiboth_log2FC, .$hidex_log2FC, data = ., paired = TRUE)
```

```
##
## Paired t-test
##
## data:  . $hiboth_log2FC and . $hidex_log2FC
## t = 0.44287, df = 14, p-value = 0.6646
## alternative hypothesis: true mean difference is not equal to 0
## 95 percent confidence interval:
## -0.05094853  0.07746414
## sample estimates:
## mean difference
##      0.01325781
```

```
t.test(abs(sum_eff$hiboth_log2FC), abs(sum_eff$hidex_log2FC), paired = TRUE)
```

```
##
## Paired t-test
##
## data:  abs(sum_eff$hiboth_log2FC) and abs(sum_eff$hidex_log2FC)
## t = -0.17724, df = 33, p-value = 0.8604
## alternative hypothesis: true mean difference is not equal to 0
## 95 percent confidence interval:
## -0.09183354  0.07711567
## sample estimates:
## mean difference
##      -0.007358935
```

```
ggplot(common_neg_eff, aes(lodex_log2FC.x, loboth_log2FC.x, label = symbol)) +
  labs(title = "Highest confidence negative effectors", y = "5 nM Dex + Idela, log2FC", x =
"5 nM Dex, log2FC") +
  geom_point() +
  geom_text_repel(size = 3, max.overlaps = 12, max.iter = 1000000) +
  geom_abline(slope = 1, intercept = 0, color = "red", size = 1) +
  xlim(-1.6, 0.1) + ylim(-1.6, 0.1) +
  theme_bw() +
  theme(axis.title = element_text(face="bold"), plot.title = element_text(face = "bold")) +
  annotate("rect", xmin = -1.6, xmax = 0.1, ymin = -1.6, ymax = 0.1 , fill= "green", alpha =
0.1)
```

## Highest confidence negative effectors

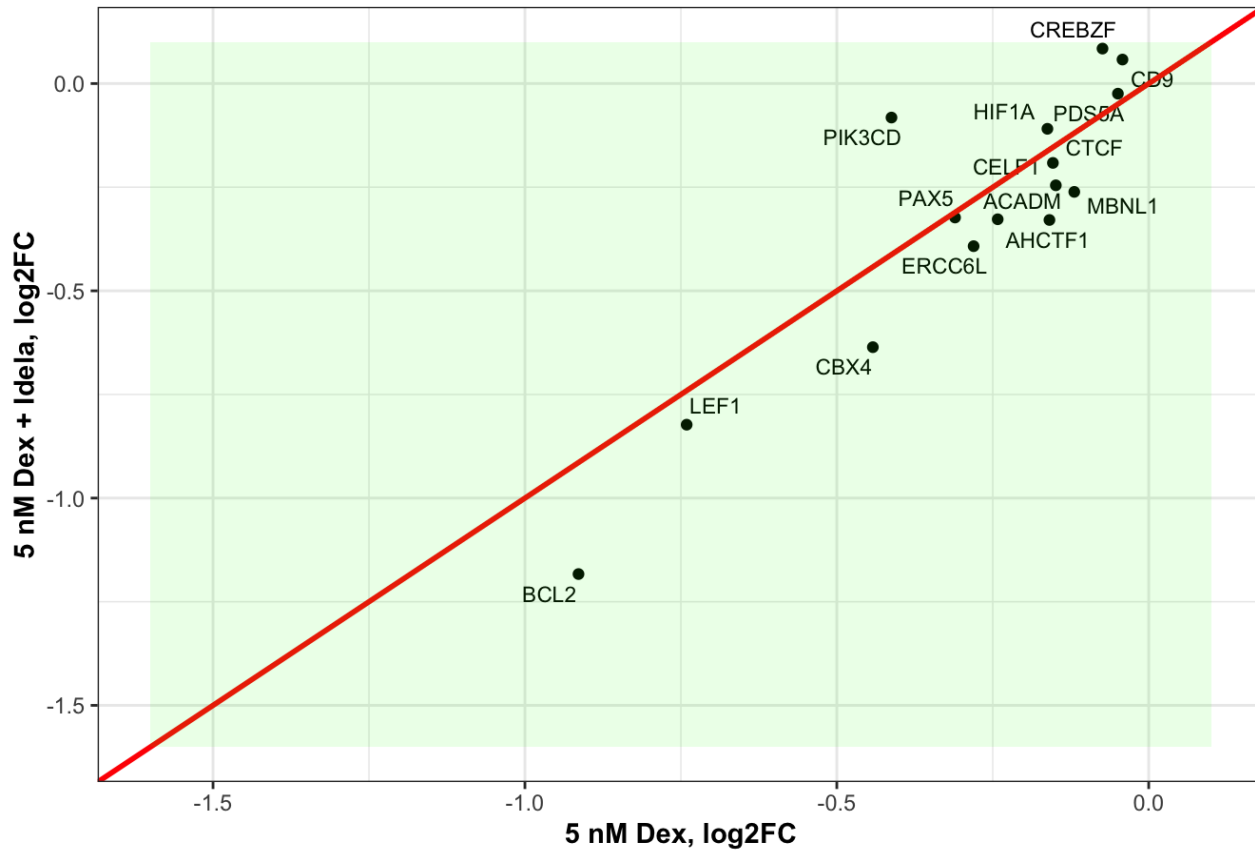

## Are any interaction genes effectors?

```
intersect(pos_cagek_effectors$symbol, res.50int_sig$symbol)
```

```
## [1] "GPS2" "SON"
```

```
intersect(pos_cagek_effectors$symbol, res.5int_sig$symbol)
```

```
## character(0)
```

```
intersect(pos_full_effectors$symbol, res.50int_sig$symbol)
```

```
## [1] "GPS2" "MED13L"
```

```
intersect(pos_full_effectors$symbol, res.5int_sig$symbol)
```

```
## character(0)
```

```
intersect(neg_cagek_effectors$symbol, res.50int_sig$symbol)
```

```
## character(0)
```



```
intersect(neg_cagek_effectors$symbol, res.5int_sig$symbol)
```

```
## character(0)
```

```
intersect(neg_full_effectors$symbol, res.50int_sig$symbol)
```

```
## [1] "AKAP1" "MME"
```

```
intersect(neg_full_effectors$symbol, res.5int_sig$symbol)
```

```
## character(0)
```

### 3. Buffering Genes

```
full_buff <- full_effector_tbl %>%  
  filter(Rho_pvalue < 0.05 & hidex_adjp < 0.05 & Rho_phenotype < 0 & hidex_log2FC > 0 | Rho_p  
value < 0.05 & hidex_adjp < 0.05 & Rho_phenotype > 0 & hidex_log2FC < 0)  
  
cagek_buff <- cagek_effector_tbl %>%  
  filter(CAGEK_Rho_pvalue < 0.05 & hidex_adjp < 0.05 & CAGEK_Rho_phenotype < 0 & hidex_log2FC  
> 0 | CAGEK_Rho_pvalue < 0.05 & hidex_adjp < 0.05 & CAGEK_Rho_phenotype > 0 & hidex_log2FC <  
0)  
  
all_buff <- full_buff %>%  
  full_join(cagek_buff, by = "symbol")  
  
common_buff <- full_buff %>%  
  inner_join(cagek_buff, by = "symbol")  
  
ggplot(common_buff, aes(hidex_log2FC.x, hiboth_log2FC.x, label = symbol)) +  
  ggtitle("Highest confidence buffering genes") + ylab("50 nM Dex + Idela, log2FC") + xlab("5  
0 nM Dex, log2FC") +  
  geom_point() +  
  geom_text_repel(size = 3, max.overlaps = 12, max.iter = 1000000) +  
  geom_abline(slope = 1, intercept = 0, color = "red", size = 1) +  
  xlim(-1, 1) + ylim(-1, 1) +  
  geom_hline(yintercept = 0) + geom_vline(xintercept = 0) +  
  theme_bw() +  
  theme(axis.title = element_text(face="bold"), plot.title = element_text(face = "bold")) +  
  annotate("rect", xmin = -Inf, xmax = 0, ymin = -Inf, ymax = 0, fill= "yellow", alpha = 0.1)  
+  
  annotate("rect", xmin = 0, xmax = Inf, ymin = 0, ymax = Inf, fill= "yellow", alpha = 0.1)
```

```
## Warning: Removed 1 rows containing missing values (`geom_point()`).
```

```
## Warning: Removed 1 rows containing missing values (`geom_text_repel()`).
```

## Highest confidence buffering genes

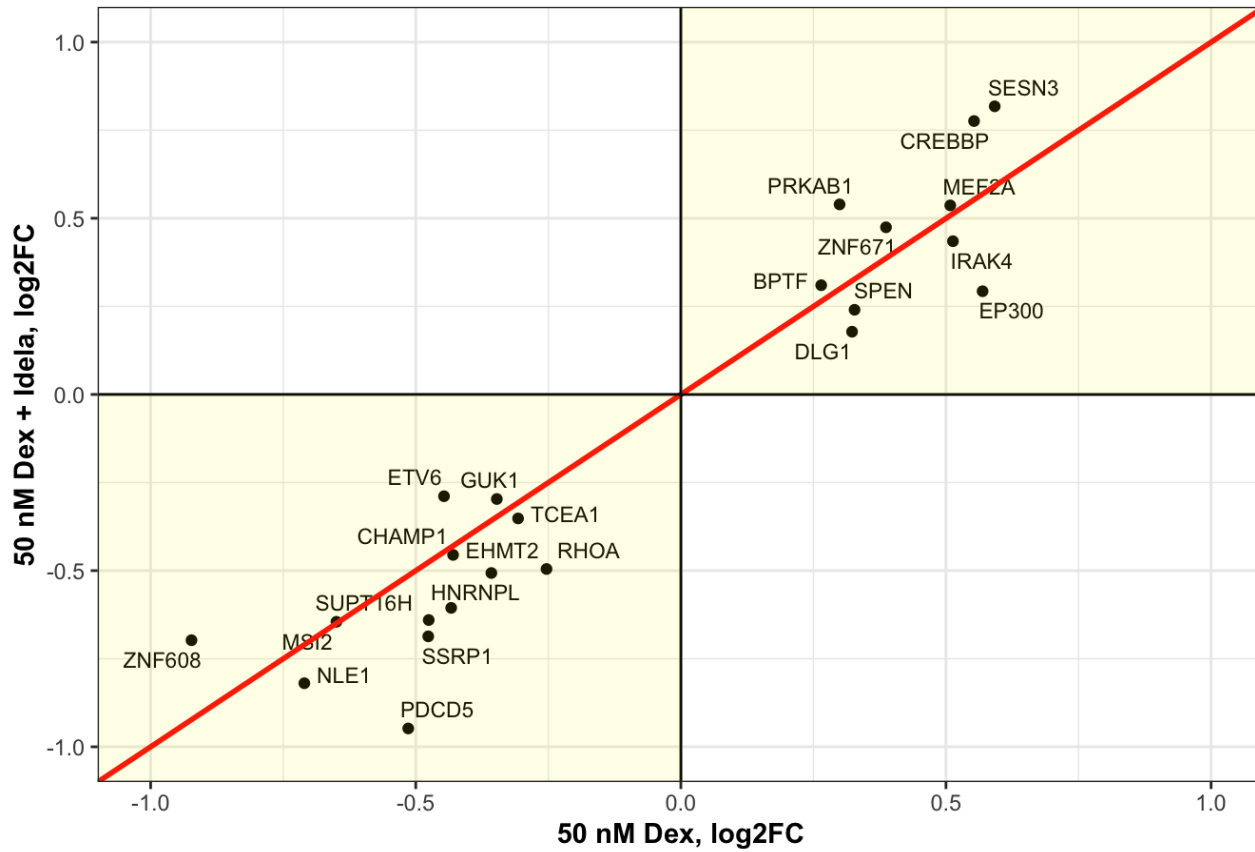

```
ggsave("common_buff_genes.pdf", width = 6, height= 6)
```

```
## Warning: Removed 1 rows containing missing values (`geom_point()`).
## Removed 1 rows containing missing values (`geom_text_repel()`).
```

## What are the dex + idela effectors

1. Positive effectors

```
#Genes that are upregulated with 50 nM Dex and Idela that are significant contributors to dex  
-induced cell death in both screen versions
```

```
di_pos_full_effectors <- full_effector_tbl %>%  
  filter(Rho_pvalue < 0.05 & hiboth_adjp < 0.05 & Rho_phenotype > 0 & hiboth_log2FC > 0)  
  
di_pos_cagek_effectors <- cagek_effector_tbl %>%  
  filter(CAGEK_Rho_pvalue < 0.05 & hiboth_adjp < 0.05 & CAGEK_Rho_phenotype > 0 & hiboth_log2  
FC > 0)  
  
# The positive effectors in either of the screens  
  
di_all_pos_eff <- di_pos_full_effectors %>%  
  full_join(di_pos_cagek_effectors, by = "symbol")  
  
# Positive effectors that were positive in both screens  
  
di_common_pos_eff <- di_pos_full_effectors %>%  
  inner_join(di_pos_cagek_effectors, by = "symbol")  
  
intersect(di_common_pos_eff$symbol, common_pos_eff$symbol)
```

```
## [1] "AFF1"      "ARID1A"    "BCL2L11"  "BMF"      "DDX6"     "MED13"    "MED24"  
## [8] "NCOA1"     "NCOR1"     "NCOR2"    "NR3C1"    "PRDM1"    "SAFB2"    "TADA3"  
## [15] "YTHDC1"    "ZNF592"
```

```
di_specific_effectors <- setdiff(di_common_pos_eff$symbol, common_pos_eff$symbol)  
dex_specific_effectors <- setdiff(common_pos_eff$symbol, di_common_pos_eff$symbol)
```

```
## Which are gained w/ addition of idela?
```

```
#di_specific <- setdiff(di_all_pos_eff$symbol, di_common)  
#dex_specific <- setdiff(all_pos_eff$symbol, di_common)
```

```
full_effector_tbl %>%  
  filter(symbol %in% di_specific_effectors) %>%  
  ggplot(aes(hidex_log2FC, hiboth_log2FC, label = symbol)) +  
  labs(title = "Expression of Idela enhanced hidex effector genes") +  
  geom_point() +  
  geom_text_repel(size = 3, max.overlaps = 12, max.iter = 1000000, label.padding = 0.1) +  
  geom_abline(slope = 1, intercept = 0, color = "red", size = 1) +  
  xlim(-0.1,1) + ylim(-0.1, 1) +  
  theme_bw()
```

```
## Warning in geom_text_repel(size = 3, max.overlaps = 12, max.iter = 1e+06, :  
## Ignoring unknown parameters: `label.padding`
```

## Expression of Idela enhanced hidex effector genes

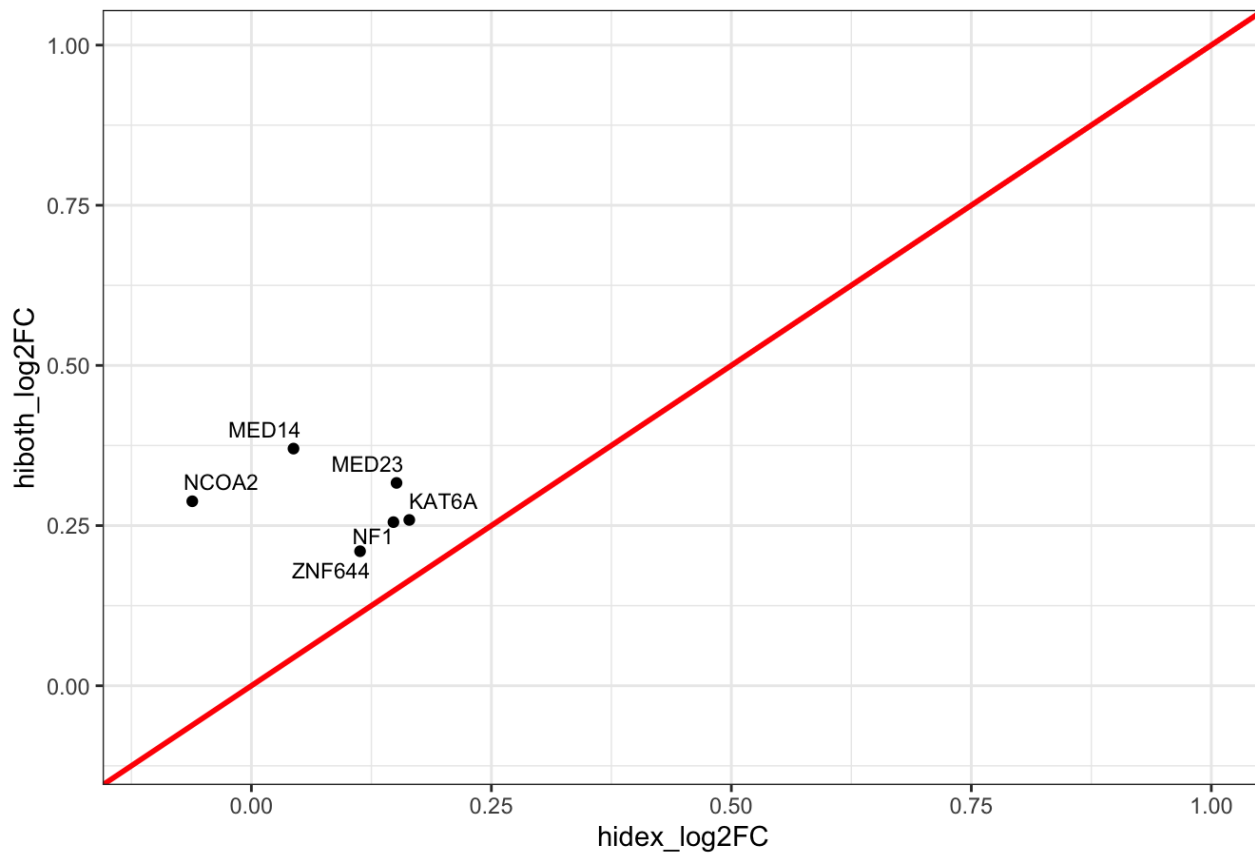

```
#dex_specific_data <- all_pos_eff %>%
# filter(symbol %in% dex_specific)

full_effector_tbl %>%
  filter(symbol %in% dex_specific_effectors) %>%
  ggplot(aes(hidex_log2FC, hiboth_log2FC, label = symbol)) +
  labs(title = "Expression of Idela diminished hidex effector genes") +
  geom_point() +
  geom_text_repel(size = 3, max.overlaps = 12, max.iter = 1000000, label.padding = 0.1) +
  geom_abline(slope = 1, intercept = 0, color = "red", size = 1) +
  xlim(-0.1,1) + ylim(-0.1, 1) +
  theme_bw()
```

```
## Warning in geom_text_repel(size = 3, max.overlaps = 12, max.iter = 1e+06, :
## Ignoring unknown parameters: `label.padding`
```

## Expression of Idela diminished hidex effector genes

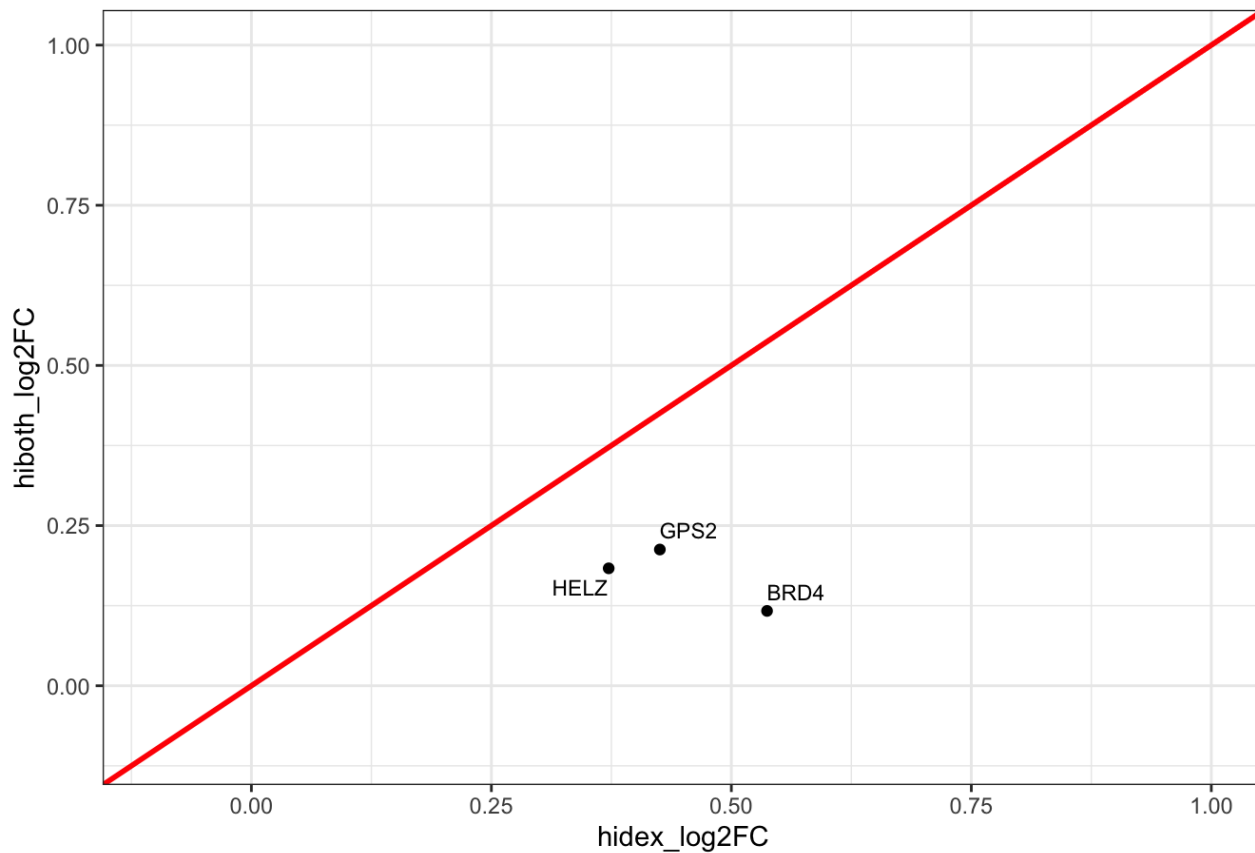

```
#full_effector_tbl %>%
# filter(symbol %in% di_common) %>%
# ggplot(aes(hidex_log2FC, hiboth_log2FC, label = symbol)) +
# labs(title = "Effector genes with HiDex +/- Idela") +
# geom_point() +
# geom_text_repel(size = 3, max.overlaps = 12, max.iter = 1000000, label.padding = 0.1) +
# geom_abline(slope = 1, intercept = 0, color = "red", size = 1) +
# xlim(-0.25,6) + ylim(-0.25, 6) +
# theme_bw()
```

### #Filter for significant genes

```
hidex_full_eff_loose <- full_effector_tbl %>%
  filter(Rho_pvalue < 0.05 & hidex_adj_p < 0.05 & abs(hidex_log2FC) < 10) %>%
  mutate(quadrant = case_when(hidex_log2FC > 0 & Rho_phenotype > 0 ~ "darkorchid4",
                              hidex_log2FC < 0 & Rho_phenotype > 0 ~ "darkorange2",
                              hidex_log2FC < 0 & Rho_phenotype < 0 ~ "forestgreen",
                              hidex_log2FC > 0 & Rho_phenotype < 0 ~ "darkorange2"))

## positive effectors
hidex_full_eff_loose %>%
  filter(hidex_log2FC > 0 & Rho_phenotype > 0) %>%
  count()
```

```
## # A tibble: 1 × 1
##       n
##   <int>
## 1     85
```

```
## negative effectors
hidex_full_eff_loose %>%
  filter(hidex_log2FC < 0 & Rho_phenotype < 0) %>%
  count()
```

```
## # A tibble: 1 × 1
##       n
##   <int>
## 1    183
```

*#Buffering genes*

```
hidex_full_eff_loose %>%
  filter(hidex_log2FC > 0 & Rho_phenotype < 0 | hidex_log2FC < 0 & Rho_phenotype > 0) %>%
  count()
```

```
## # A tibble: 1 × 1
##       n
##   <int>
## 1    229
```

```
hidex_full_eff <- full_effector_tbl %>%
  filter(Rho_pvalue < 0.01 & hidex_adjp < 0.01 & abs(hidex_log2FC) < 10) %>%
  mutate(quadrant = case_when(hidex_log2FC > 0 & Rho_phenotype > 0 ~ "darkorchid4",
                              hidex_log2FC < 0 & Rho_phenotype > 0 ~ "darkorange2",
                              hidex_log2FC < 0 & Rho_phenotype < 0 ~ "forestgreen",
                              hidex_log2FC > 0 & Rho_phenotype < 0 ~ "darkorange2"))

ggplot(hidex_full_eff, aes(Rho_phenotype, hidex_log2FC, label = symbol)) +
  geom_point(colour = hidex_full_eff$quadrant) +
  geom_hline(yintercept = 0) + geom_vline(xintercept = 0) +
  geom_text_repel(size = 3, max.overlaps = 12, force = 2) +
  labs(title = "50 nM Dex Effectors, Full Screen", y = "50 nM Dex, log2FC", x = "Contribution
to Dex Sensitivity") +
  theme_bw() +
  theme(axis.title = element_text(face="bold")) +
  annotate("rect", xmin = Inf, xmax = 0, ymin = Inf, ymax = 0, fill= "purple", alpha = 0.1)
+
  annotate("rect", xmin = -Inf, xmax = 0, ymin = -Inf, ymax = 0 , fill= "green", alpha = 0.1)
+
  annotate("rect", xmin = 0, xmax = Inf, ymin = 0, ymax = -Inf, fill= "yellow", alpha = 0.1)
+
  annotate("rect", xmin = 0, xmax = -Inf, ymin = Inf, ymax = 0, fill= "yellow", alpha = 0.1)
```

```
## Warning: ggrepel: 121 unlabeled data points (too many overlaps). Consider
## increasing max.overlaps
```

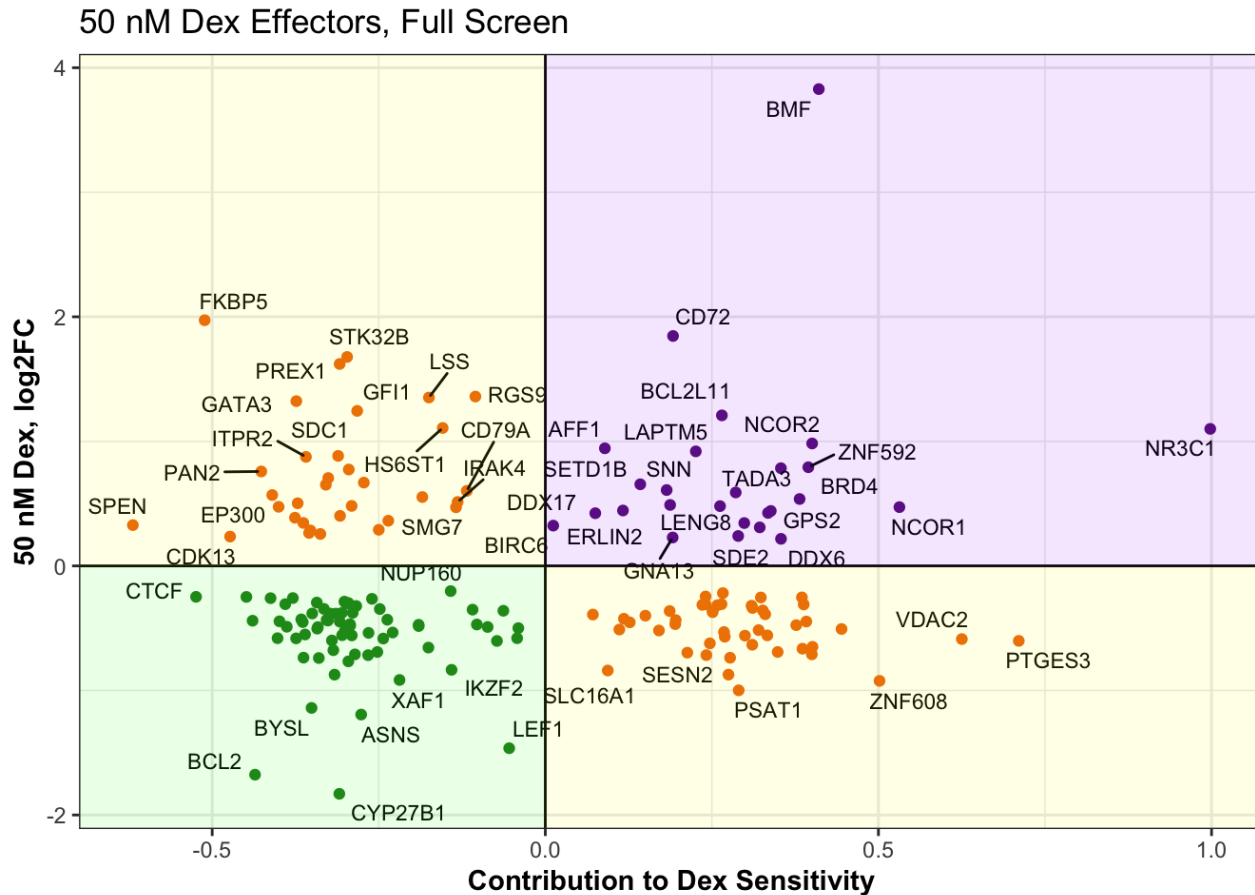

```
ggsave("hidex_full_effector_plot.pdf", width = 8, height = 8)
```

```
## Warning: ggrepel: 83 unlabeled data points (too many overlaps). Consider
## increasing max.overlaps
```

```
ggplot(hidex_full_eff, aes(Rho_phenotype, hidex_log2FC, label = symbol)) +
  geom_point(colour = hidex_full_eff$quadrant) +
  geom_hline(yintercept = 0) + geom_vline(xintercept = 0) +
  xlim(-0.55, 0) + ylim(-1.9, 0) +
  geom_text_repel(size = 3, max.overlaps = 12, force = 2) +
  labs(title = "50 nM Negative Dex Effectors, Full Screen", y = "50 nM Dex, log2FC", x = "Con
tribution to Dex Sensitivity") +
  theme_bw() +
  theme(axis.title = element_text(face="bold")) +
  annotate("rect", xmin = Inf, xmax = 0, ymin = Inf, ymax = 0, fill= "purple", alpha = 0.1)
+
  annotate("rect", xmin = -Inf, xmax = 0, ymin = -Inf, ymax = 0 , fill= "green", alpha = 0.1)
+
  annotate("rect", xmin = 0, xmax = Inf, ymin = 0, ymax = -Inf, fill= "yellow", alpha = 0.1)
+
  annotate("rect", xmin = 0, xmax = -Inf, ymin = Inf, ymax = 0, fill= "yellow", alpha = 0.1)
```

```
## Warning: Removed 106 rows containing missing values (`geom_point()`).
```

```
## Warning: Removed 106 rows containing missing values (`geom_text_repel()`).
```

```
## Warning: ggrepel: 18 unlabeled data points (too many overlaps). Consider  
## increasing max.overlaps
```

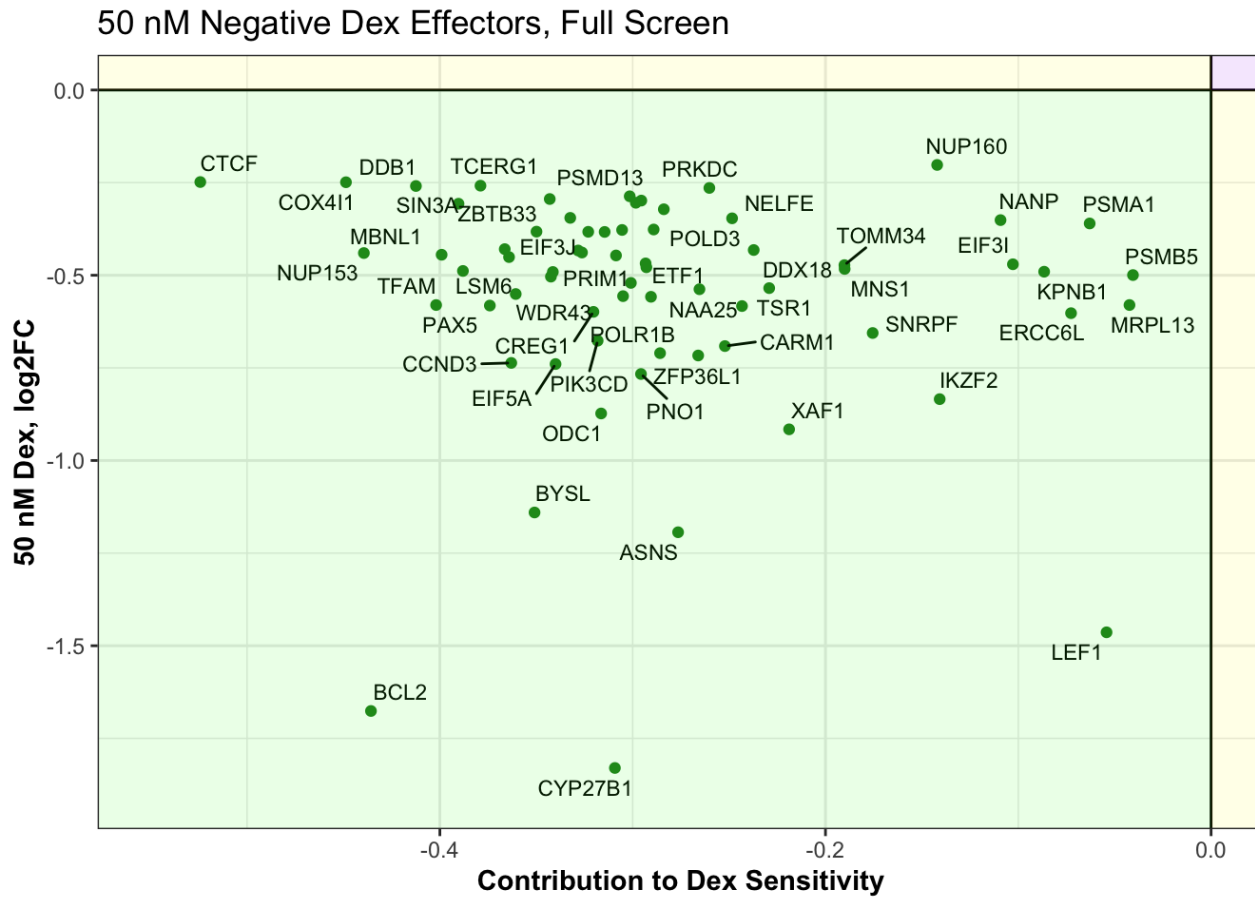

```
ggsave("hidex_full_negeffector_plot.pdf", width = 8, height = 8)
```

```
## Warning: Removed 106 rows containing missing values (`geom_point()`).
```

```
## Warning: Removed 106 rows containing missing values (`geom_text_repel()`).
```



```
ggplot(hidex_full_eff, aes(Rho_phenotype, hidex_log2FC, label = symbol)) +
  geom_point(colour = hidex_full_eff$quadrant) +
  geom_hline(yintercept = 0) + geom_vline(xintercept = 0) +
  xlim(0, 0.6) + ylim(0,2) +
  geom_text_repel(size = 3, max.overlaps = 12, max.iter = 1000000, label.padding = 0.1) +
  labs(title = "50 nM Positive Dex Effectors, Full Screen", y = "50 nM Dex, log2FC", x = "Con-
tribution to Dex Sensitivity") +
  theme_bw() +
  theme(axis.title = element_text(face="bold")) +
  annotate("rect", xmin = Inf, xmax = 0, ymin = Inf, ymax = 0, fill= "purple", alpha = 0.1)
+
  annotate("rect", xmin = -Inf, xmax = 0, ymin = -Inf, ymax = 0 , fill= "green", alpha = 0.1)
+
  annotate("rect", xmin = 0, xmax = Inf, ymin = 0, ymax = -Inf, fill= "yellow", alpha = 0.1)
+
  annotate("rect", xmin = 0, xmax = -Inf, ymin = Inf, ymax = 0, fill= "yellow", alpha = 0.1)
```

```
## Warning in geom_text_repel(size = 3, max.overlaps = 12, max.iter = 1e+06, :
## Ignoring unknown parameters: `label.padding`
```

```
## Warning: Removed 149 rows containing missing values (`geom_point()`).
```

```
## Warning: Removed 149 rows containing missing values (`geom_text_repel()`).
```

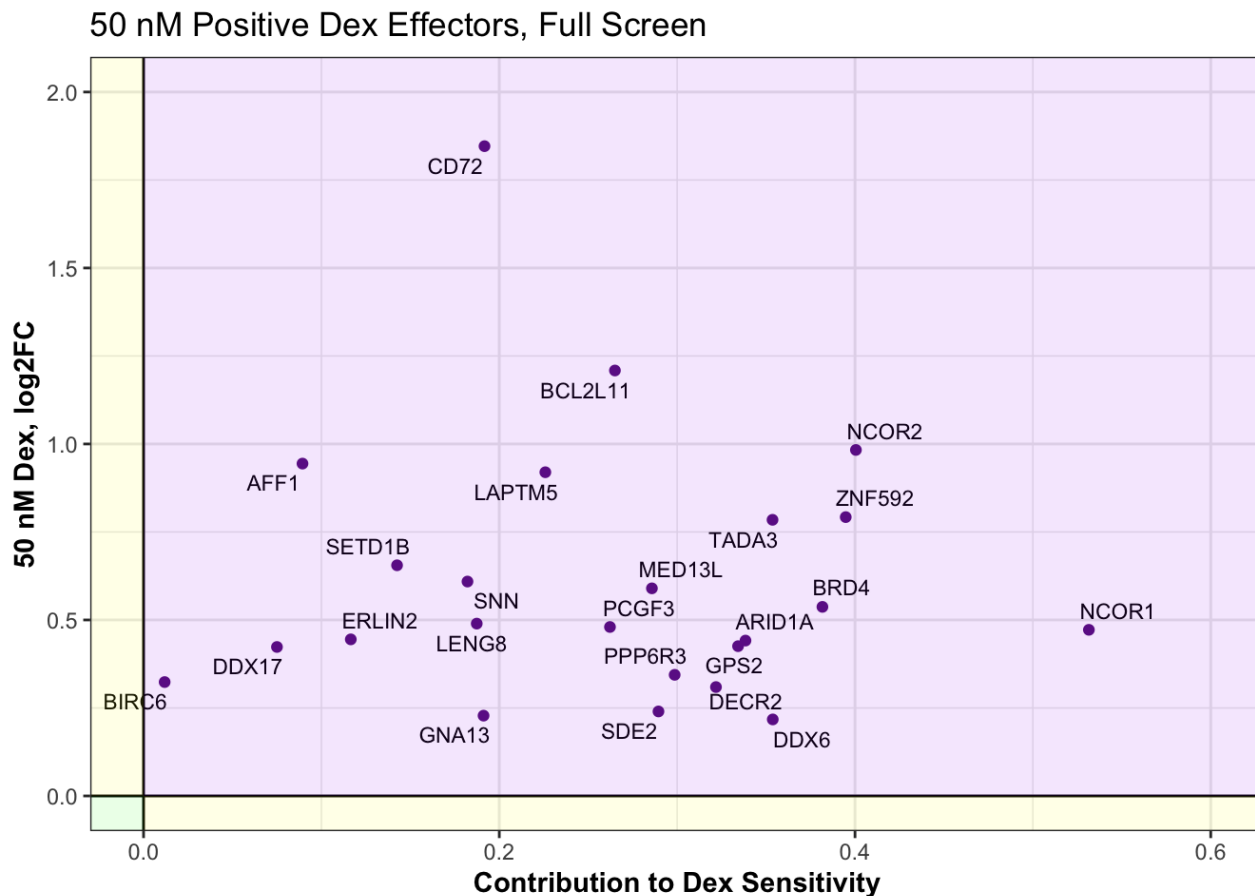

```
ggsave("hidex_full_poseffector_plot.pdf", width = 8, height = 8)
```

```
## Warning: Removed 149 rows containing missing values (`geom_point()`).  
## Removed 149 rows containing missing values (`geom_text_repel()`).
```

```
hidex_cagek_eff <- cagek_effector_tbl %>%  
  filter(CAGEK_Rho_pvalue < 0.01 & hidex_adjp < 0.01 & abs(hidex_log2FC) < 10) %>%  
  mutate(quadrant = case_when(hidex_log2FC > 0 & CAGEK_Rho_phenotype > 0 ~ "darkorchid4",  
                              hidex_log2FC < 0 & CAGEK_Rho_phenotype > 0 ~ "darkorange2",  
                              hidex_log2FC < 0 & CAGEK_Rho_phenotype < 0 ~ "forestgreen",  
                              hidex_log2FC > 0 & CAGEK_Rho_phenotype < 0 ~ "darkorange2"))  
  
ggplot(hidex_cagek_eff, aes(CAGEK_Rho_phenotype, hidex_log2FC, label = symbol)) +  
  geom_point(colour = hidex_cagek_eff$quadrant) +  
  geom_hline(yintercept = 0) + geom_vline(xintercept = 0) +  
  geom_text_repel(size = 3, max.overlaps = 12, max.iter = 1000000, label.padding = 0.1) +  
  labs(title = "50 nM Dex Effectors, CAGEK", y = "50 nM Dex, log2FC", x = "Contribution to De  
x Sensitivity") +  
  theme_bw() +  
  theme(axis.title = element_text(face="bold")) +  
  annotate("rect", xmin = Inf, xmax = 0, ymin = Inf, ymax = 0, fill= "purple", alpha = 0.1)  
+  
  annotate("rect", xmin = -Inf, xmax = 0, ymin = -Inf, ymax = 0 , fill= "green", alpha = 0.1)  
+  
  annotate("rect", xmin = 0, xmax = Inf, ymin = 0, ymax = -Inf, fill= "yellow", alpha = 0.1)  
+  
  annotate("rect", xmin = 0, xmax = -Inf, ymin = Inf, ymax = 0, fill= "yellow", alpha = 0.1)
```

```
## Warning in geom_text_repel(size = 3, max.overlaps = 12, max.iter = 1e+06, :  
## Ignoring unknown parameters: `label.padding`
```

```
## Warning: ggrepel: 59 unlabeled data points (too many overlaps). Consider  
## increasing max.overlaps
```

## 50 nM Dex Effectors, CAGEK

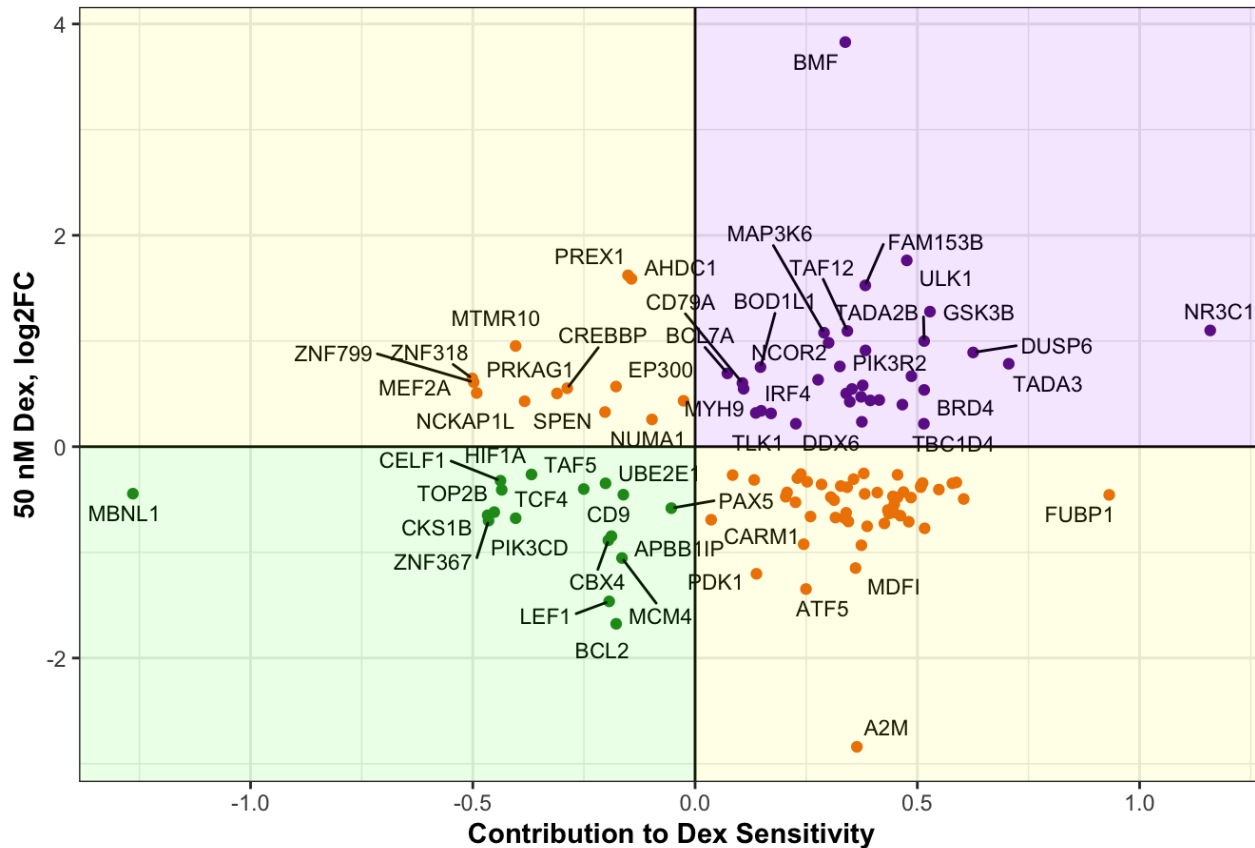

```
ggsave("hidex_cagek_effector_plot.pdf", width = 10, height = 10)
```

```
## Warning: ggrepel: 36 unlabeled data points (too many overlaps). Consider
## increasing max.overlaps
```

```
ggplot(hidex_cagek_eff, aes(CAGEK_Rho_phenotype, hidex_log2FC, label = symbol)) +
  geom_point(colour = hidex_cagek_eff$quadrant) +
  geom_hline(yintercept = 0) + geom_vline(xintercept = 0) +
  xlim(-1.3, 0) + ylim(-1.6, 0) +
  geom_text_repel(size = 3, max.overlaps = 12, max.iter = 1000000, label.padding = 0.1) +
  labs(title = "50 nM Dex Effectors, CAGEK", y = "50 nM Dex, log2FC", x = "Contribution to De
x Sensitivity") +
  theme_bw() +
  theme(axis.title = element_text(face="bold")) +
  annotate("rect", xmin = Inf, xmax = 0, ymin = Inf, ymax = 0, fill= "purple", alpha = 0.1)
+
  annotate("rect", xmin = -Inf, xmax = 0, ymin = -Inf, ymax = 0 , fill= "green", alpha = 0.1)
+
  annotate("rect", xmin = 0, xmax = Inf, ymin = 0, ymax = -Inf, fill= "yellow", alpha = 0.1)
+
  annotate("rect", xmin = 0, xmax = -Inf, ymin = Inf, ymax = 0, fill= "yellow", alpha = 0.1)
```

```
## Warning in geom_text_repel(size = 3, max.overlaps = 12, max.iter = 1e+06, :
## Ignoring unknown parameters: `label.padding`
```

```
## Warning: Removed 99 rows containing missing values (`geom_point()`).
```

```
## Warning: Removed 99 rows containing missing values (`geom_text_repel()`).
```

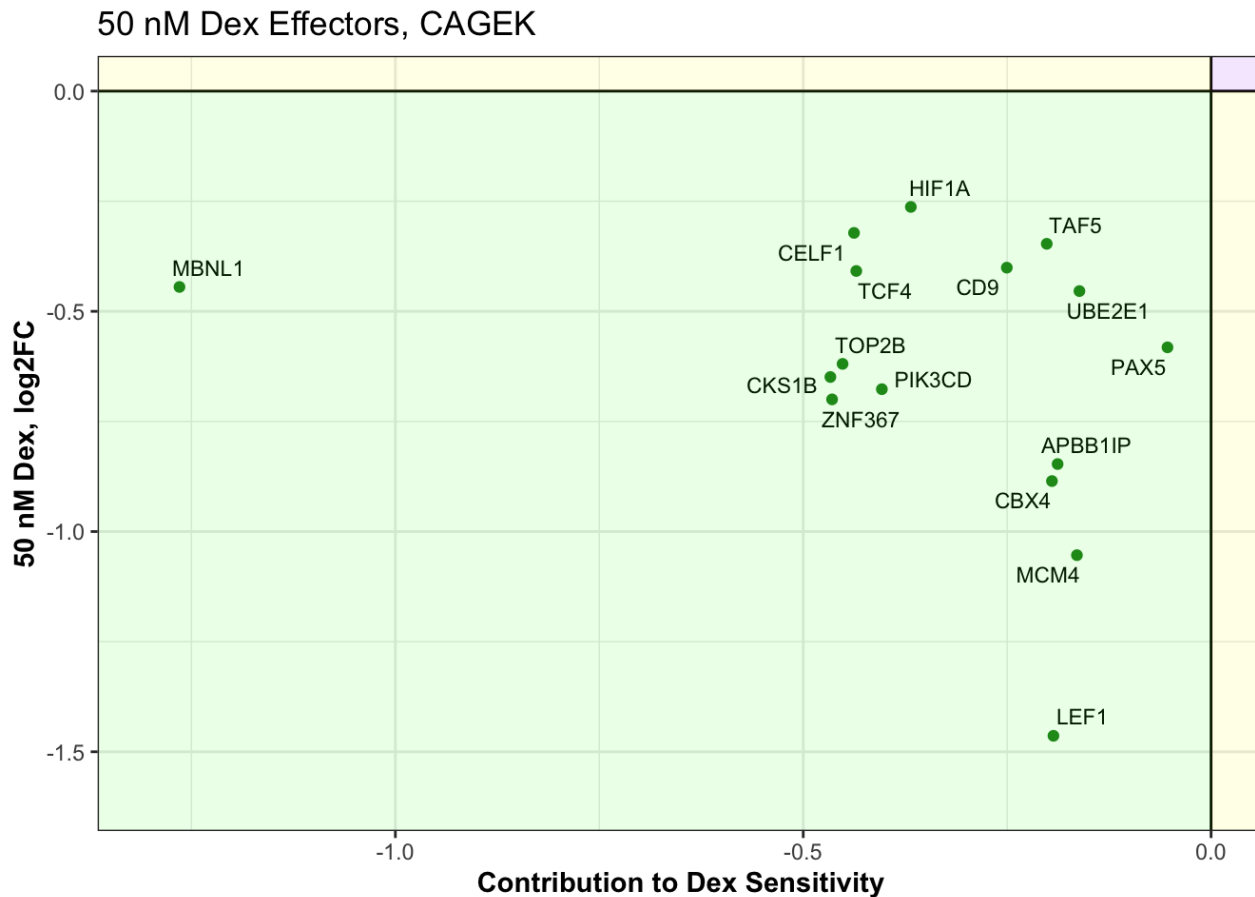

```
ggsave("hidex_cagek_negeffector_plot.pdf", width = 10, height = 10)
```

```
## Warning: Removed 99 rows containing missing values (`geom_point()`).
```

```
## Removed 99 rows containing missing values (`geom_text_repel()`).
```

```
ggplot(hidex_cagek_eff, aes(CAGEK_Rho_phenotype, hidex_log2FC, label = symbol)) +  
  geom_point(colour = hidex_cagek_eff$quadrant) +  
  geom_hline(yintercept = 0) + geom_vline(xintercept = 0) +  
  xlim(0, 0.8) + ylim(0, 2.5) +  
  geom_text_repel(size = 3, max.overlaps = 12, max.iter = 1000000, label.padding = 0.1) +  
  labs(title = "50 nM Dex Effectors, CAGEK", y = "50 nM Dex, log2FC", x = "Contribution to De  
x Sensitivity") +  
  theme_bw() +  
  theme(axis.title = element_text(face="bold")) +  
  annotate("rect", xmin = Inf, xmax = 0, ymin = Inf, ymax = 0, fill= "purple", alpha = 0.1)  
+  
  annotate("rect", xmin = -Inf, xmax = 0, ymin = -Inf, ymax = 0, fill= "green", alpha = 0.1)  
+  
  annotate("rect", xmin = 0, xmax = Inf, ymin = 0, ymax = -Inf, fill= "yellow", alpha = 0.1)  
+  
  annotate("rect", xmin = 0, xmax = -Inf, ymin = Inf, ymax = 0, fill= "yellow", alpha = 0.1)
```

```
## Warning in geom_text_repel(size = 3, max.overlaps = 12, max.iter = 1e+06, :
## Ignoring unknown parameters: `label.padding`
```

```
## Warning: Removed 83 rows containing missing values (`geom_point()`).
```

```
## Warning: Removed 83 rows containing missing values (`geom_text_repel()`).
```

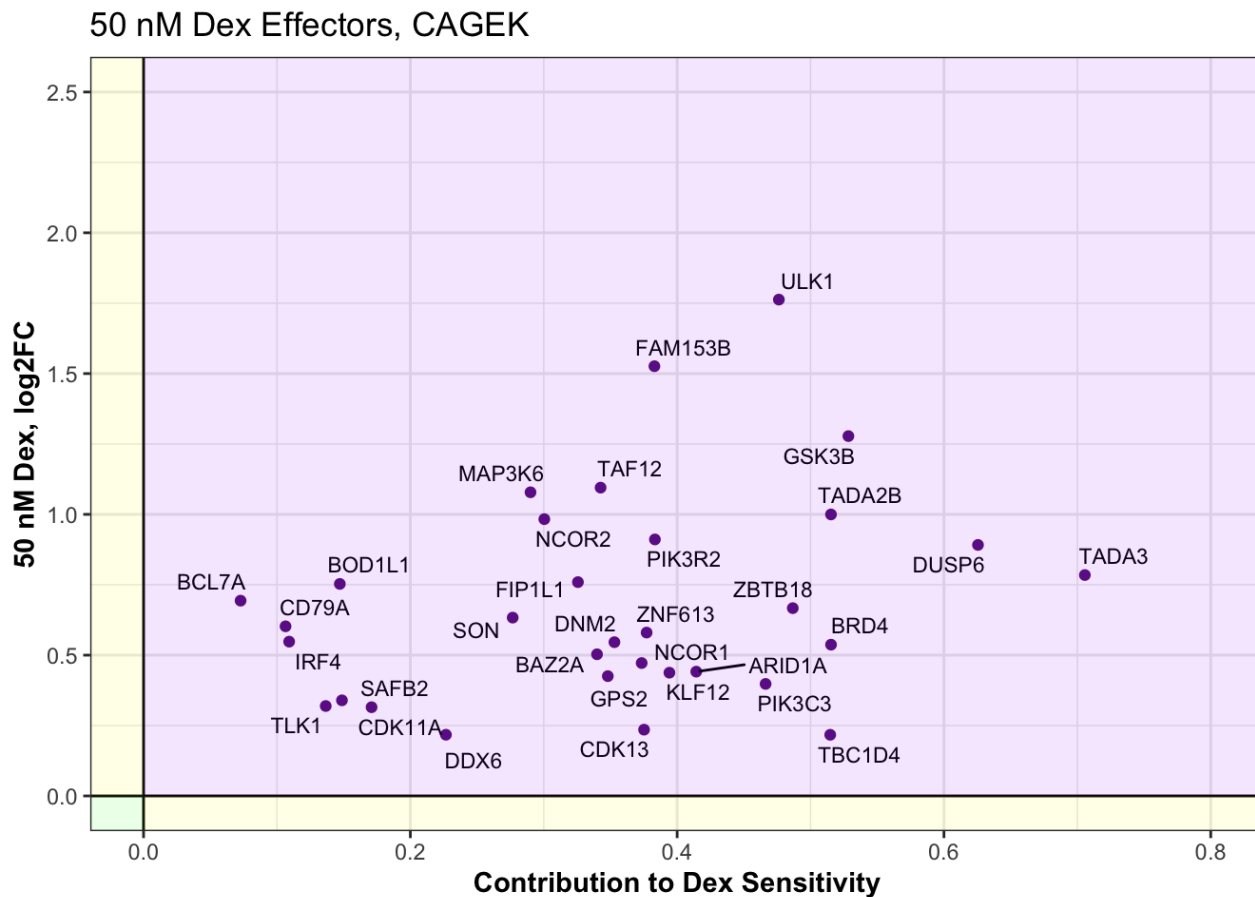

```
ggsave("hidex_cagek_poseffector_plot.pdf", width = 10, height = 10)
```

```
## Warning: Removed 83 rows containing missing values (`geom_point()`).
## Removed 83 rows containing missing values (`geom_text_repel()`).
```

## But are any of these affecting growth or GC sensitivity?

Sensitivity from full screen

```
lo_int_full_rhos <- full_rhos %>%
  filter(symbol %in% int_genes) %>%
  filter(Rho_pvalue <= 0.05)
nrow(lo_int_full_rhos)
```

```
## [1] 1
```

Growth from full screen

```
lo_int_full_gammas <- full_gammas %>%  
  filter(symbol %in% int_genes) %>%  
  filter(Gamma_qvalue <= 0.05)  
nrow(lo_int_full_gammas)
```

```
## [1] 0
```

Sensitivity from CAGEK screen

```
cagek_rhos <- cagek_rhos[, c(1:7)]  
  
lo_int_cagek_rhos <- cagek_rhos %>%  
  filter(symbol %in% int_genes) %>%  
  filter(CAGEK_Rho_pvalue <= 0.05)  
nrow(lo_int_cagek_rhos)
```

```
## [1] 0
```

Growth from CAGEK screen

```
lo_int_cagek_gammas <- cagek_gammas %>%  
  filter(symbol %in% int_genes) %>%  
  filter(CAGEK_Gamma_pvalue <= 0.05)  
nrow(lo_int_cagek_gammas)
```

```
## [1] 0
```

Conclusion: Enhanced cell death is from additive regulation of effector genes, not from a few very differently regulated genes.

## But what about genes showing an interaction at 50 nM Dex?

```
hi_int_genes <- res.50int_sig %>%  
  filter(abs(log2FoldChange) < 10) %>%  
  na.omit() %>%  
  pull(symbol)
```

Sensitivity from full screen

```
hi_int_full_rhos <- full_rhos %>%  
  filter(symbol %in% hi_int_genes) %>%  
  filter(Rho_pvalue <= 0.05)  
nrow(hi_int_full_rhos)
```

```
## [1] 9
```

## Growth from full screen

```
hi_int_full_gammas <- full_gammas %>%  
  filter(symbol %in% hi_int_genes) %>%  
  filter(Gamma_qvalue <= 0.05)  
nrow(hi_int_full_gammas)
```

```
## [1] 3
```

## Sensitivity from CAGEK screen

```
hi_int_cagek_rhos <- cagek_rhos %>%  
  filter(symbol %in% hi_int_genes) %>%  
  filter(CAGEK_Rho_pvalue <= 0.05)  
nrow(hi_int_cagek_rhos)
```

```
## [1] 3
```

## Growth from CAGEK screen

```
hi_int_cagek_gammas <- cagek_gammas %>%  
  filter(symbol %in% hi_int_genes) %>%  
  filter(CAGEK_Gamma_pvalue <= 0.05)  
nrow(hi_int_cagek_gammas)
```

```
## [1] 7
```

A few genes that show an interaction between 50 nM Dex and Idela show a phenotype in the screens, suggesting that these may be effector genes of idela synergy.

Let's look at the nature of the interaction to see if it might contribute to synergy.

First, make a table for regulated genes under all conditions:

```

hi_and_both_reg_filt <- hi_and_both_reg %>%
  rownames_to_column('ensembl') %>%
  arrange(symbol, ensembl) %>%
  filter(!duplicated(symbol))

hi_and_both_reg_longer <- hi_and_both_reg_filt %>%
  pivot_longer(idel_log2FC:hiboth_adj, names_to = c("treatment", "stat"), names_pattern = "(^\\w+)_((\\w+)$)") %>%
  pivot_wider(names_from = stat, values_from = value) %>%
  mutate(treatment = factor(treatment, levels = c("idel", "lodex", "loboth", "hidex", "hiboth")))

hi_and_both_reg_longer %>%
  dplyr::filter(symbol %in% hi_int_full_rhos$symbol) %>%
  ggplot(aes(treatment, log2FC, fill = treatment)) +
  labs(x = "", y = "log2FoldChange") +
  geom_col(position = "dodge") +
  scale_fill_viridis(discrete = T, option = "E") +
  facet_wrap(~symbol, scales = "free") + theme_bw() +
  theme(legend.position="none", axis.text.x = element_text(angle = 45, hjust = 1)) +
  geom_errorbar(aes(ymin=log2FC-lfcse, ymax=log2FC+lfcse), position = position_dodge(width = 0.9), width=0.5, colour="black", size = 0.5)

```

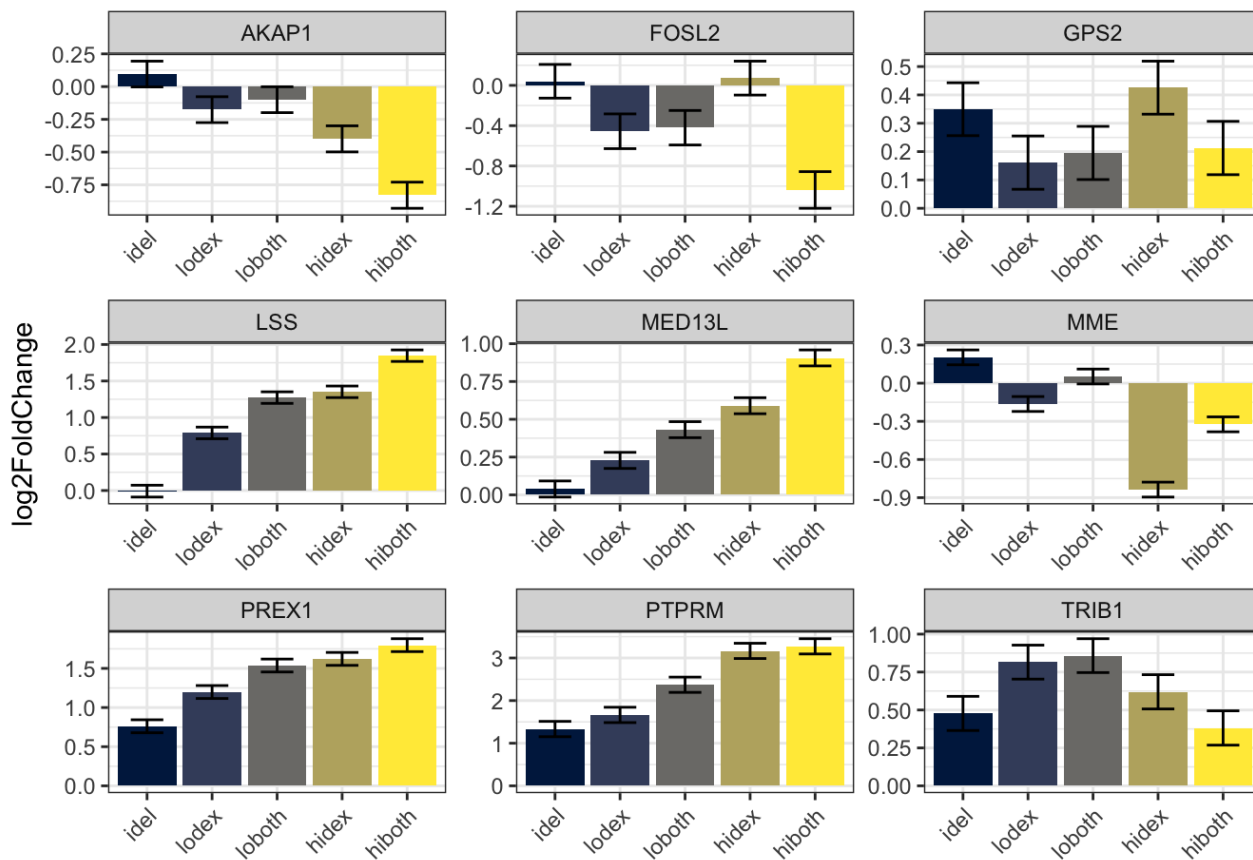

**Synergistic high dex interaction genes**



```

hi_int_genes <- res.50int_sig %>%
  filter(abs(log2FoldChange) < 10) %>%
  filter(log2FoldChange > 0) %>%
  na.omit() %>%
  pull(symbol)

hi_and_both_reg_longer %>%
  dplyr::filter(symbol %in% hi_int_genes) %>%
  ggplot(aes(treatment, log2FC, fill = treatment)) +
  labs(x = "", y = "log2FoldChange") +
  geom_col(position = "dodge") +
  scale_fill_viridis(discrete = T, option = "E") +
  facet_wrap(~symbol) + theme_bw() +
  theme(legend.position="none", axis.text.x = element_text(angle = 45, hjust = 1)) +
  geom_errorbar(aes(ymin=log2FC-lfcse, ymax=log2FC+lfcse), position = position_dodge(width =
0.9), width=0.5, colour="black", size = 0.5)

```

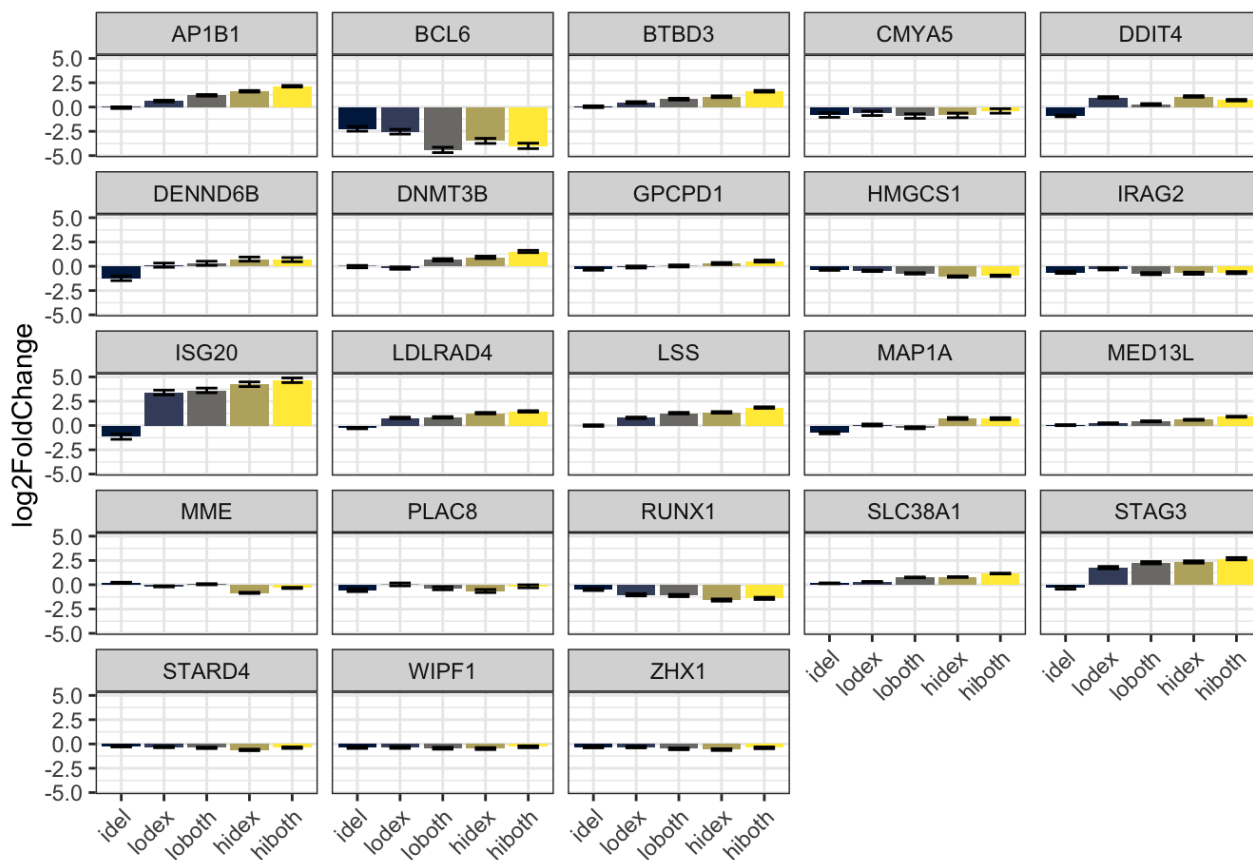

**Common interaction genes b/w 5 nM Dex and 50 nM Dex**  
**Synergistic**

```

common_int_syn <- common_int %>%
  dplyr::filter(log2FoldChange.x > 0) %>%
  na.omit()

hi_and_both_reg_longer %>%
  dplyr::filter(symbol %in% common_int_syn$symbol.y) %>%
  ggplot(aes(treatment, log2FC, fill = treatment)) +
  labs(x = "", y = "log2FoldChange") +
  geom_col(position = "dodge") +
  scale_fill_viridis(discrete = T, option = "E") +
  facet_wrap(~symbol) + theme_bw() +
  theme(legend.position="none", axis.text.x = element_text(angle = 45, hjust = 1)) +
  geom_errorbar(aes(ymin=log2FC-lfcse, ymax=log2FC+lfcse), position = position_dodge(width =
0.9), width=0.5, colour="black", size = 0.5)

```

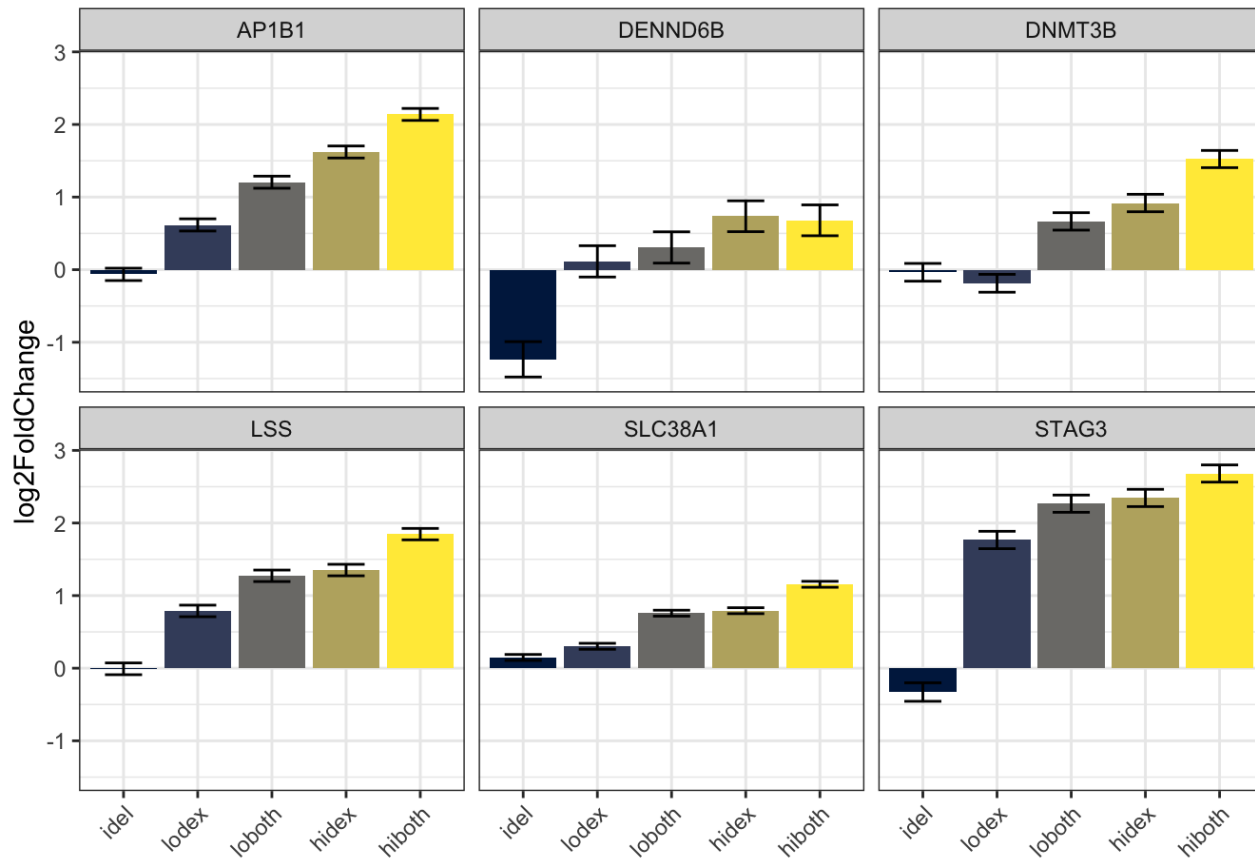

## Buffering

```

common_int_buff <- common_int %>%
  dplyr::filter(log2FoldChange.x < 0) %>%
  na.omit()

hi_and_both_reg_longer %>%
  dplyr::filter(symbol %in% common_int_buff$symbol.y) %>%
  ggplot(aes(treatment, log2FC, fill = treatment)) +
  labs(x = "", y = "log2FoldChange") +
  geom_col(position = "dodge") +
  scale_fill_viridis(discrete = T, option = "E") +
  facet_wrap(~symbol) + theme_bw() +
  theme(legend.position="none", axis.text.x = element_text(angle = 45, hjust = 1)) +
  geom_errorbar(aes(ymin=log2FC-lfcse, ymax=log2FC+lfcse), position = position_dodge(width =
0.9), width=0.5, colour="black", size = 0.5)

```

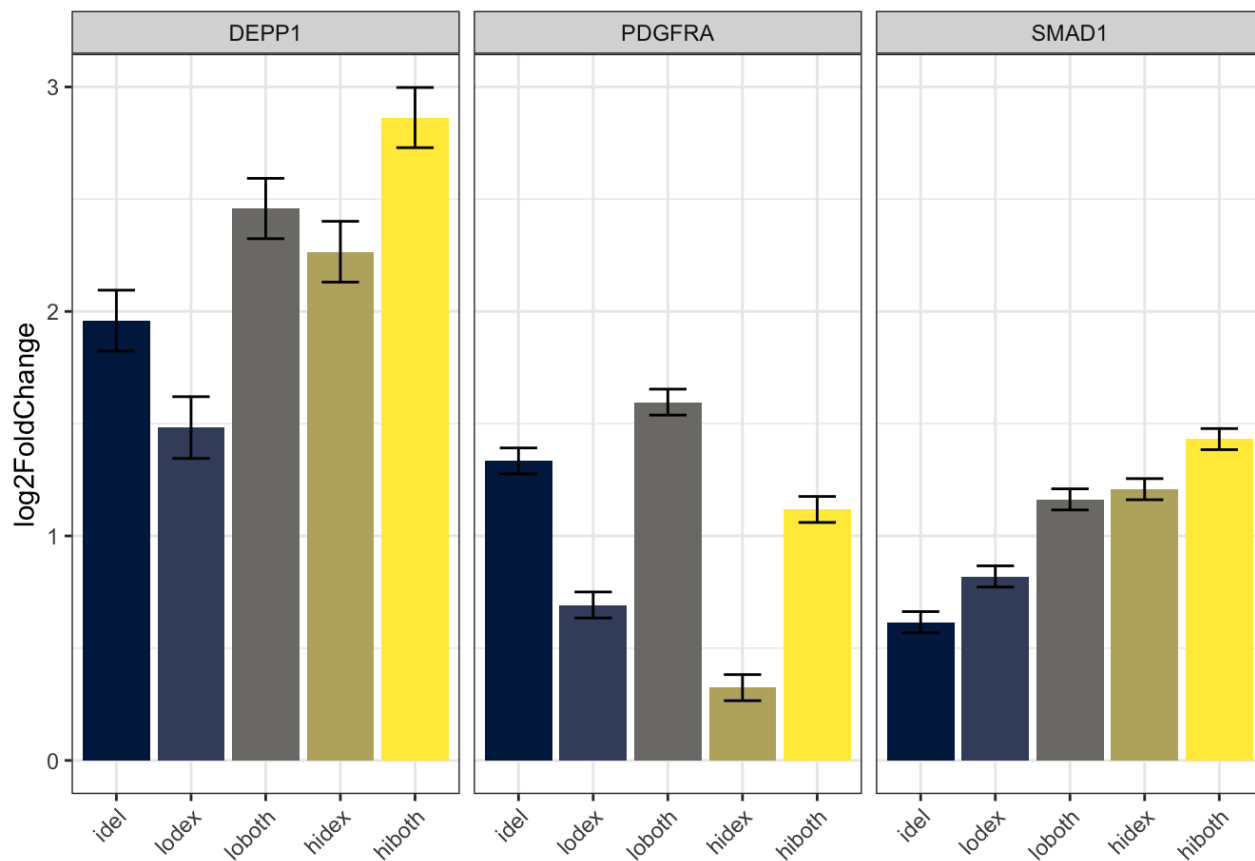

## How many are greater than additive?

```

hi_int <- hi_and_both_reg_filt %>%
  dplyr::filter(symbol %in% hi_int_genes)

hi_syn_genes <- dplyr::filter(hi_int, abs(hiboth_log2FC) > abs(idel_log2FC + hidex_log2FC))

```

So 22 genes are regulated more than additively by hidex and idel

## How many are effectors?

```
hi_syn_full_rhos <- full_rhos %>%
  filter(symbol %in% hi_syn_genes$symbol) %>%
  filter(Rho_pvalue <= 0.05)
nrow(hi_syn_full_rhos)
```

```
## [1] 2
```

One gene - *DDX39A* is a positive effector gene that is synergistically regulated by dex & idela.

```
hi_syn_cagek_rhos <- cagek_rhos %>%
  filter(symbol %in% hi_syn_genes$symbol) %>%
  filter(CAGEK_Rho_pvalue <= 0.05)
nrow(hi_syn_cagek_rhos)
```

```
## [1] 0
```

One gene, *MCM7*, is a buffering gene, meaning it is contributes to dex-induced cell death, but is synergistically downregulated by dex & idela.

```
hi_syn_genes %>%
  pivot_longer(idel_log2FC:hiboth_adjp, names_to = c("treatment", "stat"), names_pattern = "(^\\w+)_([^\\w+])") %>%
  pivot_wider(names_from = stat, values_from = value) %>%
  mutate(treatment = factor(treatment, levels = c("idel", "lodex", "loboth", "hidex", "hibot
h"))) %>%
  ggplot(aes(treatment, log2FC, fill = treatment)) +
  labs(x = "", y = "log2FoldChange") +
  geom_col(position = "dodge") +
  scale_fill_viridis(discrete = T, option = "E") +
  facet_wrap(~symbol) + theme_bw() +
  theme(legend.position="none", axis.text.x = element_text(angle = 45, hjust = 1), panel.grid.major = element_line("lightgray", 0.25),
        panel.grid.minor = element_line("lightgray", 0.1)) +
  geom_errorbar(aes(ymin=log2FC-lfcse, ymax=log2FC+lfcse), position = position_dodge(width = 0.9), width=0.4, colour="black", size = 0.4)
```

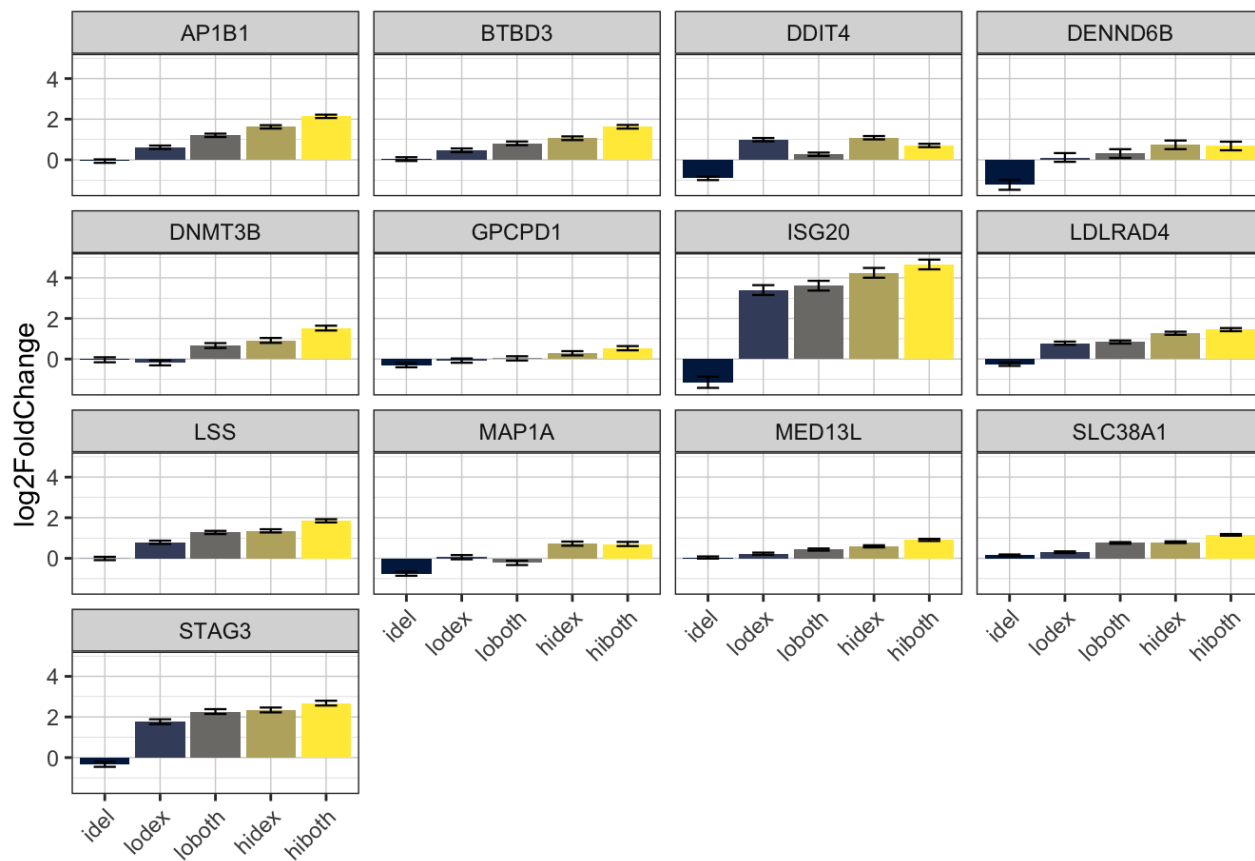

```
ggsave("hidex_syn_interacting_genes.pdf", width = 8, height = 6)
```

## Which effector genes are most strongly regulated?

The way to do this would be to take the significant rho genes, and overlap them with the significantly regulated genes. For those, we then want to look at those with the biggest fold change difference between dex and dex + idela. So let's do it:

```
#let's combine the tables of significant phenotype and significant regulation
olap_rhos_reg <- sig_rhos %>%
  inner_join(lo_and_both_reg, by = c("Symbol" = "symbol")) %>%
  mutate(diff_lo_idel = lodex_log2FC - loboth_log2FC)
n_distinct(olap_rhos_reg$Symbol)
```

```
## [1] 256
```

```
# Same w/ CAGEK screen
c_olap_rhos_reg <- c_sig_rhos %>%
  inner_join(lo_and_both_reg, by = c("Symbol" = "symbol")) %>%
  mutate(diff_lo_idel = lodex_log2FC - loboth_log2FC)
n_distinct(c_olap_rhos_reg)
```

```
## [1] 142
```

```
doub_imp_genes <- intersect(olap_rhos_reg$Symbol, c_olap_rhos_reg$Symbol)
```

Genes that consistently give a phenotype in both screens are our most confident hits. Of these, there are 37 that are significantly regulated under some condition. Perhaps the best thing to do is to make graphs for each of these and pick the ones that are most interesting to test.

```
lo_and_both_reg_longer <- lo_and_both_reg %>%
  pivot_longer(idel_log2FC:hiboth_adjp, names_to = c("treatment", "stat"), names_pattern = "(^
\\w+)_ (\\w+)$") %>%
  pivot_wider(names_from = stat, values_from = value) %>%
  mutate(treatment = factor(treatment, levels = c("idel", "lodex", "loboth", "hidex", "hibot
h")))

lo_and_both_reg_longer %>%
  dplyr::filter(symbol %in% doub_imp_genes) %>%
  ggplot(aes(treatment, log2FC, fill = treatment)) +
  labs(x = "", y = "log2FoldChange") +
  geom_col(position = "dodge") +
  scale_fill_viridis(discrete = T, option = "E") +
  facet_wrap(~symbol, scales = "free") + theme_bw() +
  theme(legend.position="none", axis.text.x = element_text(angle = 45, hjust = 1)) +
  geom_errorbar(aes(ymin=log2FC-lfcse, ymax=log2FC+lfcse), position = position_dodge(width =
0.9), width=0.5, colour="black", size = 0.5)
```

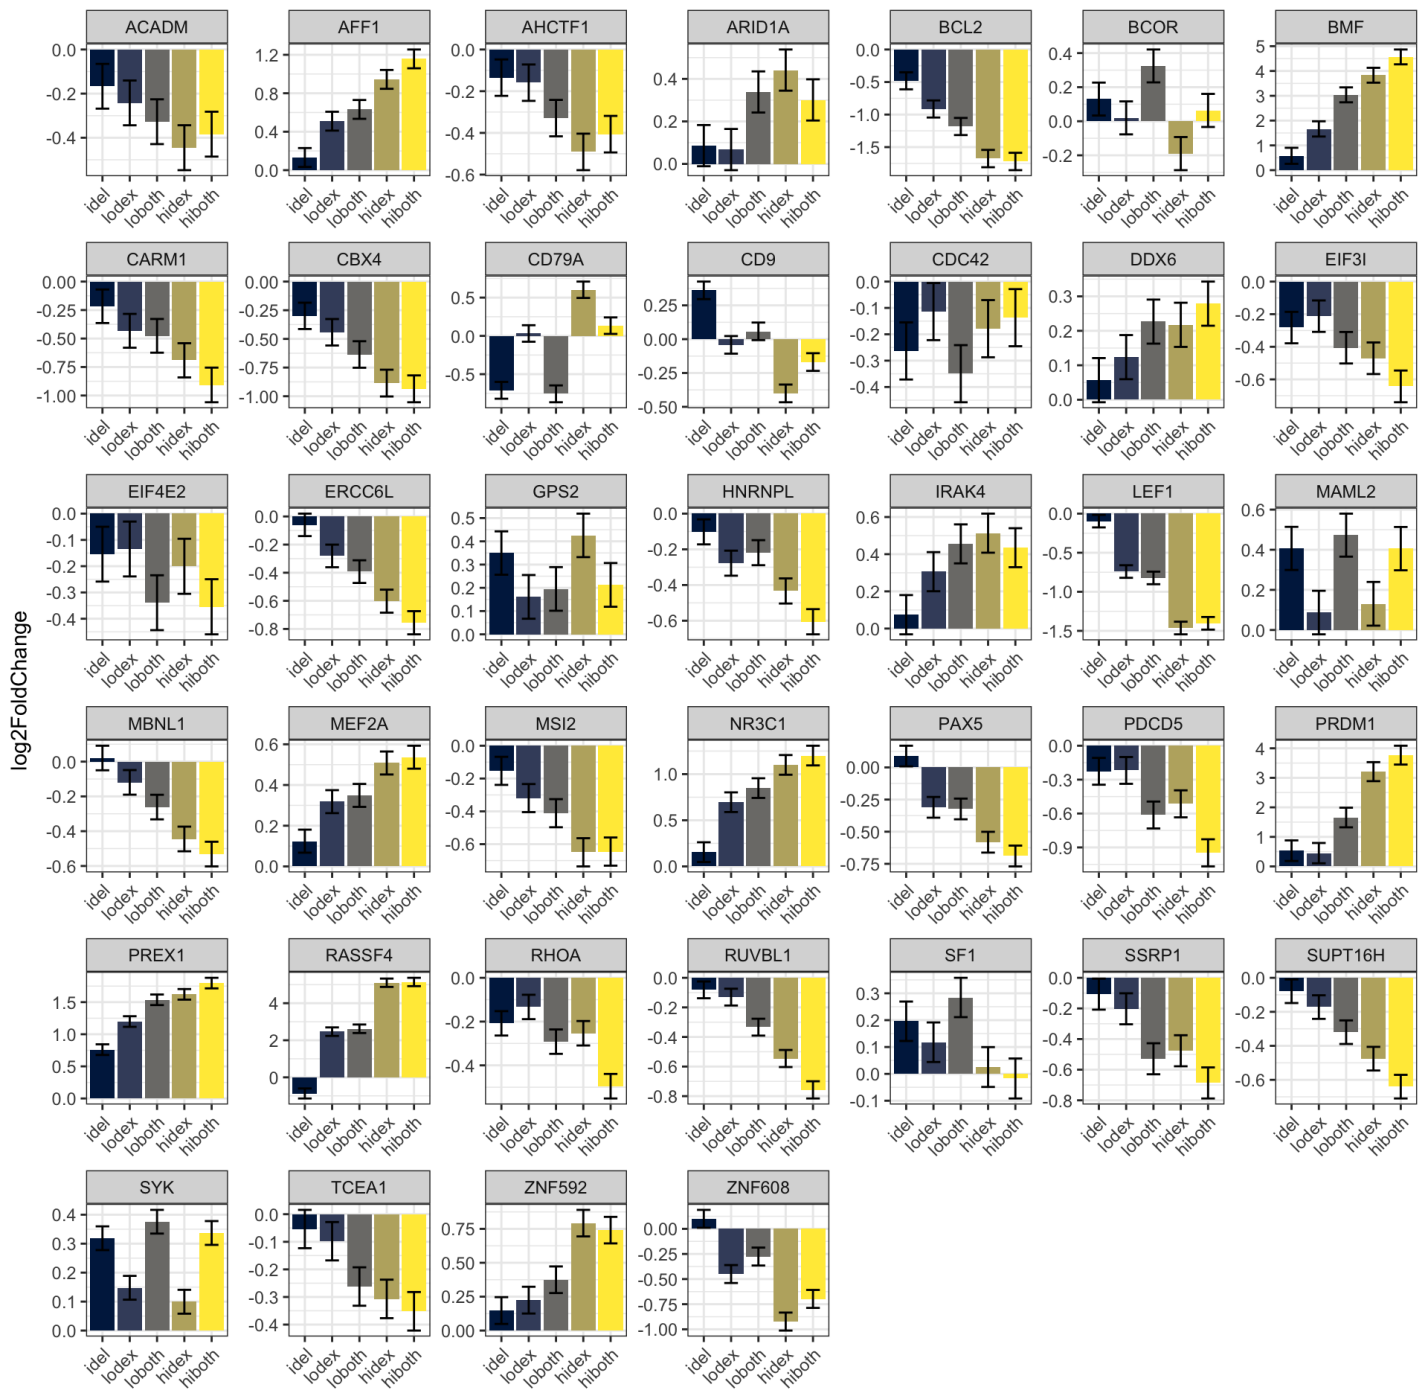

```

lo_and_both_reg_longer %>%
  dplyr::filter(symbol %in% reg_genes) %>%
  ggplot(aes(treatment, log2FC, fill = treatment)) +
  labs(x = "", y = "log2FoldChange") +
  geom_col(position = "dodge") +
  scale_fill_viridis(discrete = T, option = "E") +
  facet_wrap(~symbol, scales = "free") + theme_bw() +
  theme(legend.position="none", axis.text.x = element_text(angle = 45, hjust = 1)) +
  geom_errorbar(aes(ymin=log2FC-lfcse, ymax=log2FC+lfcse), position = position_dodge(width =
0.9), width=0.5, colour="black", size = 0.5)

```

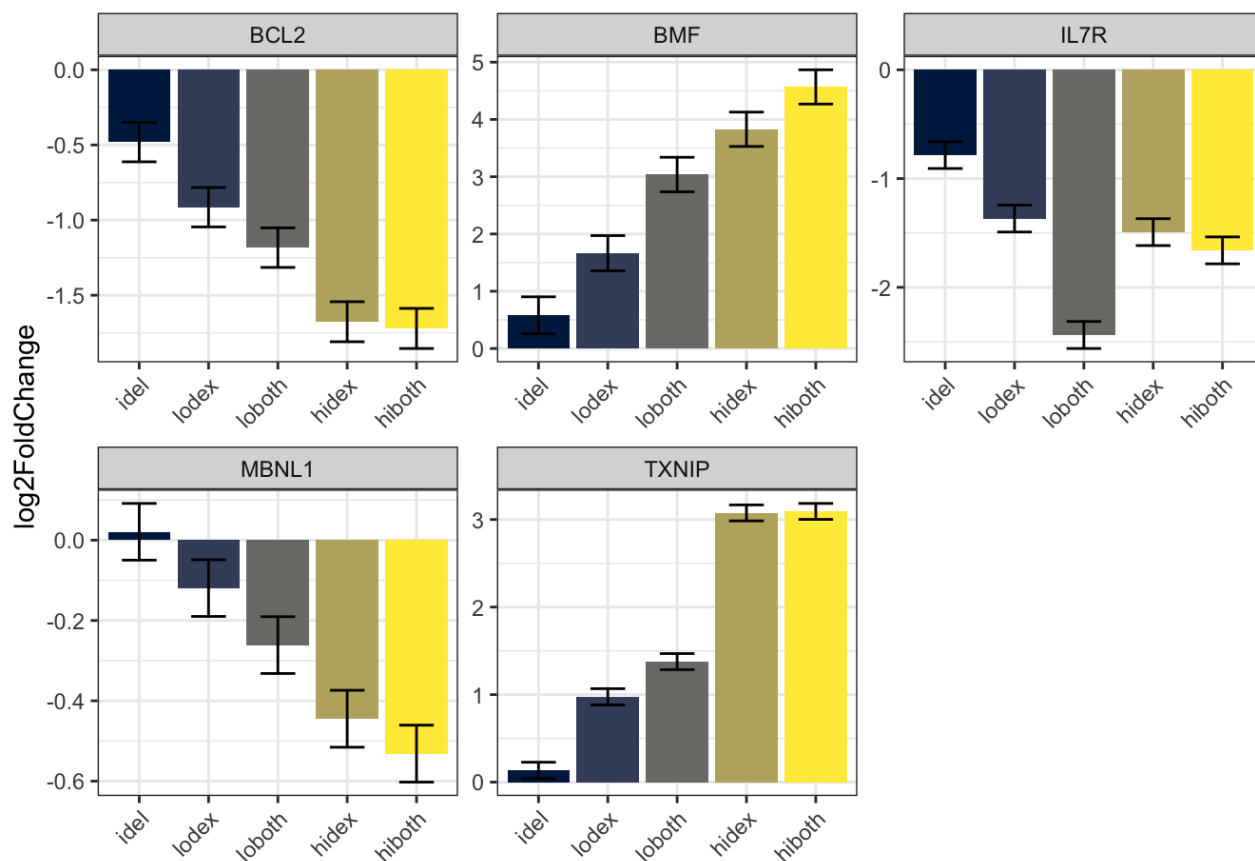

```
sum_longer <- sum_tbl_2 %>%
  pivot_longer(idel_log2FC:hiboth_adjp, names_to = c("treatment", "stat"), names_pattern = "(^
\\w+)_((\\w+)$)") %>%
  pivot_wider(names_from = stat, values_from = value) %>%
  mutate(treatment = factor(treatment, levels = c("idel", "lodox", "loboth", "hidex", "hibot
h")))

jess_genes <- c("BCL2", "BCL2L11", "IL7R", "TXNIP")

sum_longer %>%
  dplyr::filter(symbol %in% jess_genes) %>%
  ggplot(aes(treatment, log2FC, fill = treatment)) +
  labs(x = "", y = "log2FoldChange") +
  geom_col(position = "dodge") +
  scale_fill_viridis(discrete = T, option = "E") +
  facet_wrap(~symbol) + theme_bw() +
  theme(legend.position="none", axis.text.x = element_text(angle = 45, hjust = 1)) +
  geom_errorbar(aes(ymin=log2FC-lfcse, ymax=log2FC+lfcse), position = position_dodge(width =
0.9), width=0.5, colour="black", size = 0.5)
```



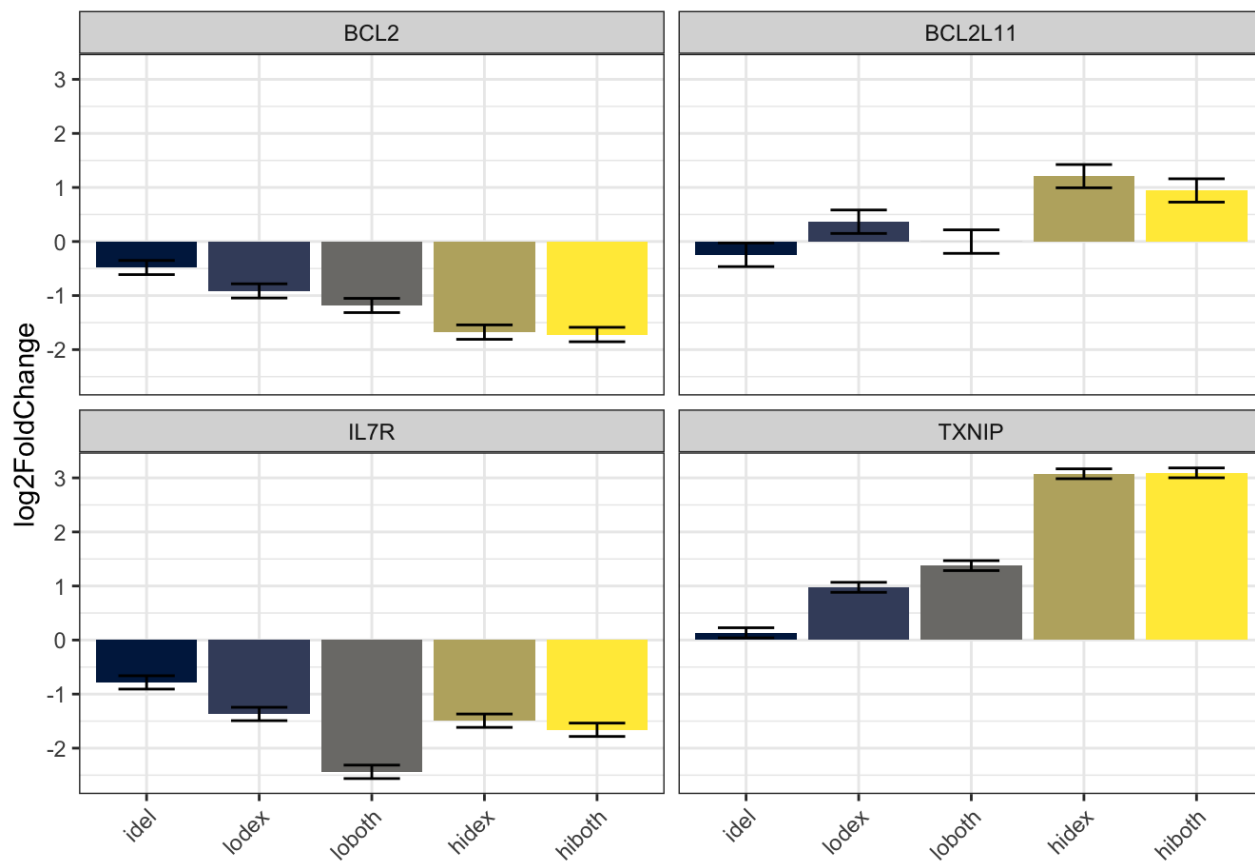

```
ggsave(filename = "eff_genes_barplot.pdf", height = 4, width = 4)
```

```
x <- c("CHD4  
MTA2  
RBBP4  
RBBP7  
GATAD2A  
GATAD2B  
HDAC1  
HDAC2  
SMARCC2  
SMARCA4  
SMARCD2  
SMARCC1  
SMARCE1  
SMARCB1  
SMARCA5  
SMARCD1  
SMARCA2  
ARID1A  
ARID1B  
ARID2  
NCOR1  
NCOR2  
Sin3A  
SUDS3  
FAM60A  
PHF12  
KDM1A  
KDM2B  
KDM3A  
KDM3B  
KDM5A  
KDM6A  
KAT5  
KMT2D  
WDR5  
ASH2L  
MED14  
MED15  
MED17  
MED22  
MED25  
MED8  
TRIM24  
TRIM28  
PELP1  
PAXIP1  
RCOR1  
RCOR3  
TCF20  
NCOA3  
NCOA6  
TADA2A  
ZBTB20  
ZBTB9  
ZBED3
```

```

HCFC1
PPM1G
PPP4R1
MCM4
MCM5
ZNF512")
cofactors <- read_table(x, col_names = FALSE)

full_rhos_min %>%
  filter(Rho_pvalue <= 0.05 & symbol %in% cofactors$X1)

```

```

## # A tibble: 14 × 3
##   symbol Rho_phenotype Rho_pvalue
##   <chr>      <dbl>      <dbl>
## 1 ARID1A      0.338    1.48e- 4
## 2 CHD4        0.392    7.50e- 9
## 3 HDAC2     -0.326    9.07e- 3
## 4 KAT5       -0.288    1.73e- 2
## 5 KDM1A     -0.281    1.65e- 2
## 6 KDM2B      0.112    2.71e- 3
## 7 KDM5A     -0.250    1.31e- 3
## 8 KMT2D     -0.400    4.50e- 9
## 9 MED14      0.325    2.59e- 5
## 10 NCOR1     0.531    4.57e- 7
## 11 NCOR2     0.400    2.10e-11
## 12 PAXIP1    0.132    3.82e- 2
## 13 SMARCD1   0.196    1.30e- 3
## 14 TADA2A   -0.298    3.51e- 2

```
