# Supplementary material for: PI3Kδ Inhibition Potentiates Glucocorticoids in B-lymphoblastic Leukemia by Decreasing Receptor Phosphorylation and Enhancing Gene Regulation
Source: Cancers (Basel). 2023 Dec 27;16(1):143. doi: 10.3390/cancers16010143 (PMC10778422; doi:10.3390/cancers16010143)
Supplement: Supplementary file 1 [file cancers-16-00143-s001.zip]

Archive with 5 entries (5 files):
- dex_idela_rnaseq_Rcode.pdf
- markdown_pt_sample_synergistic_vs_additive_20231016.pdf
- markdown_pt_samples_RUVseq_20231016.pdf
- Supplemental Materials File S1.pdf
- Supplemental Materials.pdf
